# Supplementary material for: One-Pot Synthesis and Applications of N-Heteroaryl Iodonium Salts
Source: PubMed Central journal article supplement (PMC3943608; doi:10.1002/open.201300042), 2014-01-23

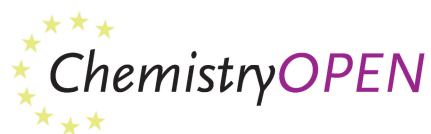

## Supporting Information

© 2014 The Authors. Published by Wiley-VCH Verlag GmbH & Co. KGaA, Weinheim

### **One-Pot Synthesis and Applications of N-Heteroaryl Iodonium Salts**

Marcin Bielawski, Joel Malmgren, Leticia M. Pardo, Ylva Wikmark, and Berit Olofsson<sup>\*[a]</sup>

[open\\_201300042\\_sm\\_miscellaneous\\_information.pdf](#)

## SUPPORTING INFORMATION

|   |                                                                   |    |
|---|-------------------------------------------------------------------|----|
| 1 | General Experimental Conditions                                   | 2  |
| 2 | NMR Analysis of Concentration Effect and Deprotonation            | 2  |
| 3 | Synthesis of <i>N</i> -Heteroaryliodonium Triflates 3' and 3      | 4  |
| 4 | Arylation of Phenols 4 to diaryl ethers 5 <sup>[4]</sup>          | 11 |
| 5 | Arylation of Diethyl methylmalonate 6 to Product 7 <sup>[6]</sup> | 12 |
| 6 | References                                                        | 12 |
| 7 | Copies of NMR spectra                                             | 12 |

## 1 General Experimental Conditions

Precautions to exclude air or moisture were not taken, except when mentioned. Commercial *m*CPBA was dried under vacuum at rt for 1 hour and subsequently the percentage of active oxidising reagent was determined by iodometric titration.<sup>[1]</sup> All other commercially available chemicals were used as received. For TLC analyses precoated silica gel 60 F<sub>254</sub> plates were used; and for column chromatography 40-60 μm, 60A silica gel was used. Melting points were measured using a STUART SMP3 and are reported uncorrected. NMR spectra were recorded using a 400 or 500 MHz Bruker AVANCE II with a BBO probe at 298 K, using MeOH-*d*<sub>4</sub> and CDCl<sub>3</sub> as solvents. Chemical shifts are given in ppm relative to the (residual) solvent peak (<sup>1</sup>H NMR: CDCl<sub>3</sub> δ 7.26, MeOH-*d*<sub>4</sub> δ 3.31; <sup>13</sup>C NMR: CDCl<sub>3</sub> δ 77.23, MeOH-*d*<sub>4</sub> δ 49.0) with multiplicity (s = singlet, d = doublet, t = triplet, q = quartet, m = multiplet, app = apparent), coupling constants (in Hz) and integration. High-resolution mass analyses were obtained using a Bruker microTOF ESI.

## 2 NMR Analysis of Concentration Effect and Deprotonation

### 2.1 Concentration effects in the NMR Analysis of 3b'

Diaryliodonium salt **3b'** was analysed by NMR together with either an excess of TfOH (Figure 1, top, green) or Et<sub>3</sub>N (Figure 1, bottom, orange) in order to obtain the spectrum for full protonation and deprotonation respectively. Different amounts of salt **3b'** in 0.5 mL of MeOH-*d*<sub>4</sub> were then run to find that their spectra fit between the two extremes of protonated and deprotonated **3b'** (Figure 1).

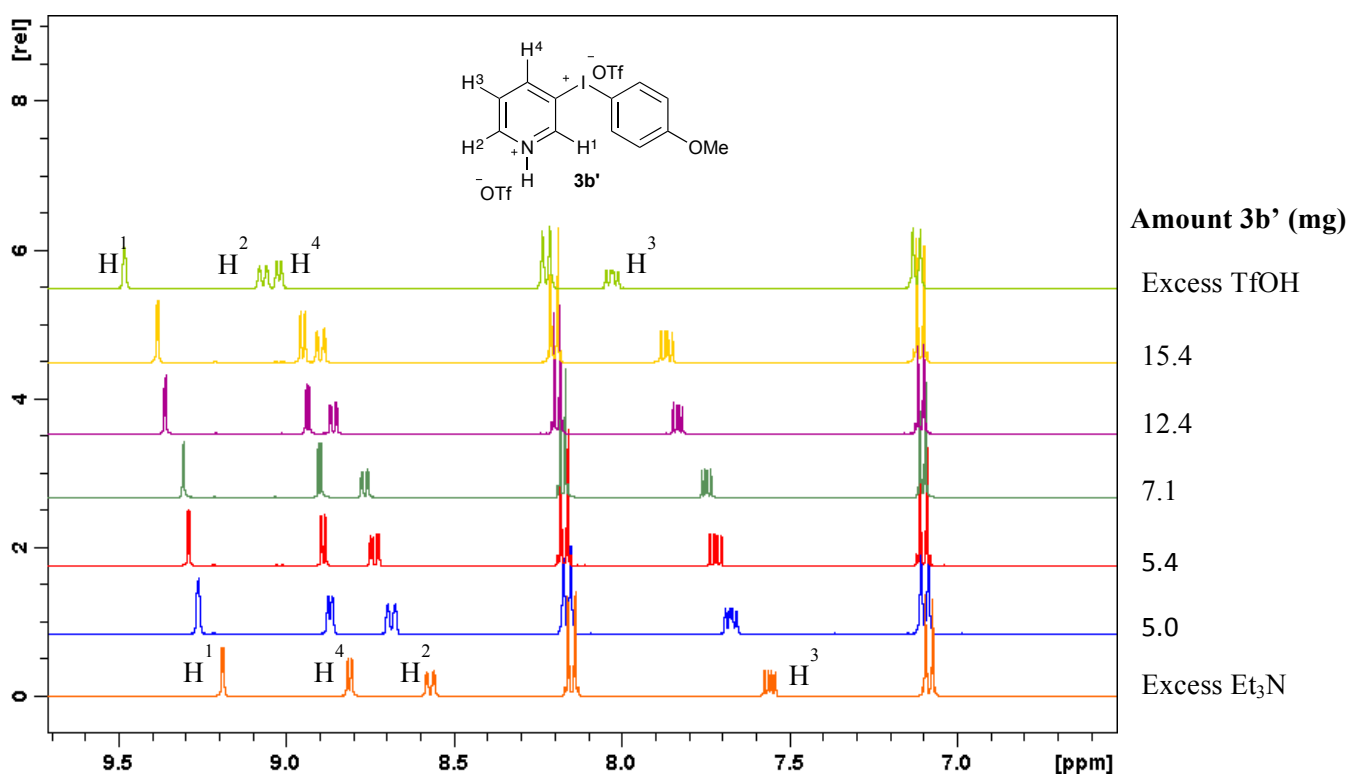

Figure S1. NMR spectra of different concentrations of **3b'** in MeOH-*d*<sub>4</sub>.

Due to the concentration effect described above, it is possible to distinguish between the two species **3'** and **3** by running two  $^1\text{H}$  NMRs with different sample concentrations. If the shifts do not differ, the salt is deprotonated. A second NMR could also be run after the addition of a small amount of  $\text{Et}_3\text{N}$ .  $^{19}\text{F}$  NMR with fluorobenzene as the internal standard can also be utilized. Compounds **3e'** and **3e** were synthesised in order to compare the  $^{19}\text{F}$ -NMR ratio with an intramolecular internal standard. As expected, the integral ratio between the two peaks were 1:6 and 1:3 respectively.

## 2.2 Deprotonation of Products **3'** to **3**

To a column ( $\varnothing = 1.5$  cm) was added cotton ( $h \approx 0.5$  cm, packed) followed by addition of sand ( $h = 0.5$  cm).  $\text{CH}_2\text{Cl}_2$  was then added to the column followed by basic  $\text{Al}_2\text{O}_3$  (1.5 g). Salt **3'** (0.24 mmol) dissolved in  $\text{CH}_2\text{Cl}_2$  (0.5 mL) and MeOH (0.1 mL) was then applied on the column. The column was eluted with a mixture of  $\text{CH}_2\text{Cl}_2$  and MeOH (20:1, 40 mL), and the eluted liquids were concentrated *in vacuo* to give the desired deprotonated salt **3**. *NB*: When scaling up, use the same height of  $\text{Al}_2\text{O}_3$  as in the described procedure by using a broader column.

### Screened Deprotonation Methods

- Addition of  $\text{NaHCO}_3$  or  $\text{NaOAc}$  as solids or in solution to the crude material was inefficient.
- Purification by silica with a  $\text{NH}_3$  (aq. 25%) in the eluent worked, but  $\text{NH}_4\text{OTf}$  eluted together with product **3b**.
- Addition of  $\text{Et}_3\text{N}$  to **3b'** in  $\text{CH}_2\text{Cl}_2$  followed by evaporation *in vacuo* and precipitation with  $\text{Et}_2\text{O}$  gave the deprotonated product **3b** in 67% yield, which was difficult to reproduce.

## 3 Synthesis of *N*-Heteroaryliodonium Triflates **3'** and **3**

### 3.1 Method A

To a solution of heteroaryl iodide **1** (0.24 mmol) in CH<sub>2</sub>Cl<sub>2</sub> (1 mL) was added TfOH (4 equiv) and the resulting mixture was stirred at rt for 5 min. *m*CPBA (1.5 equiv) followed by the appropriate arene (1.1 equiv) was then added. The reaction vessel was sealed and submitted to a 60 °C oilbath with stirring for 30 min. The reaction mixture was then allowed to reach rt after which it was concentrated *in vacuo*. Et<sub>2</sub>O (1 mL) was added and the mixture was stirred at 0 °C for 30 min. The resulting precipitate was filtered through a glass-sintered funnel and washed with additional Et<sub>2</sub>O (3 x 1 mL) to give the protonated *N*-heteroaryliodonium bistriflate **3'**.

### 3.2 Method B (for **3b'**, **3g'**, **3j'**)

To a solution of heteroaryl iodide **1** (1.51 mmol) in CH<sub>2</sub>Cl<sub>2</sub> (10 mL) was added TfOH (4 equiv) and the resulting mixture was stirred at rt for 5 min. *m*CPBA (1.75 equiv) was then added. The reaction vessel was sealed and submitted to a 60 °C oilbath with stirring for 30 min after which it was cooled down to 0 °C. H<sub>2</sub>O (2 equiv) was added, followed by the dropwise addition of the appropriate arene **2** (1.2 equiv) dissolved in CH<sub>2</sub>Cl<sub>2</sub> (2 mL) *via* syringe. The reaction mixture was stirred for 15 min at 0 °C before it was concentrated *in vacuo*. Et<sub>2</sub>O (1-3 mL) was added and the mixture was cooled to 0 °C and stirred for 30 min. The resulting precipitate was filtered through a glass sintered funnel and washed with additional Et<sub>2</sub>O (3 x 3 mL) to give the protonated *N*-heteroaryliodonium bistriflate **3'**.

### 3.3 Analytical Data

#### Phenyl(3-pyridinium)iodonium bistriflate **3a'**

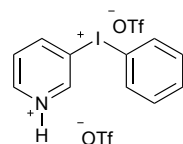

Synthesized according to Method A from **1a** and benzene (**2a**) to give **3a'** in 69% yield as a light grey solid; mp 127-130 °C; <sup>1</sup>H NMR (400 MHz, 5 mg in MeOH-*d*<sub>4</sub>, (0.5 mL)) δ 9.29 (d, *J* = 1.6, 1H), 8.87 (dd, *J* = 4.9, 1.3, 1H), 8.71 (ddd, *J* = 8.3, 2.2, 1.3, 1H), 8.26 (appd, *J* = 8.5, 2H), 7.72 (appt, *J* = 7.5, 1H), 7.65 (ddd, *J* = 8.4, 5.0, 0.7, 1H), 7.57 (appt, *J* = 8.0, 2H); <sup>13</sup>C NMR (100 MHz, 20 mg in MeOH-*d*<sub>4</sub> (0.5 mL)): δ 152.3, 151.1, 147.2, 136.9, 134.2, 133.5, 129.2, 121.8 (q, *J*<sub>C-F</sub> = 316), 116.3, 115.4; HRMS (ESI): *m/z* calculated for C<sub>11</sub>H<sub>9</sub>NI ([M-HOTf-OTf]<sup>+</sup>): 281.9774, found: 281.9759.

#### 4-Methoxyphenyl(3-pyridinium)iodonium bistriflate **3b'**

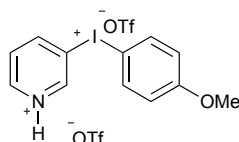

Synthesized according to Method B from **1a** and anisole (**2b**) to give **3b'** in 81% yield as an off-white solid; mp 181-183 °C; <sup>1</sup>H NMR (500 MHz, 12.4 mg in MeOH-*d*<sub>4</sub> (0.5 mL)) δ 9.36-9.35 (m, 1H), 8.94 (dd, *J* = 5.2, 1.3, 1H), 8.86 (ddd, *J* = 8.3, 2.2, 1.3, 1H), 8.19 (appd, *J* = 9.2, 2H), 7.83 (ddd, *J* = 8.3, 5.2, 0.7, 1H), 7.11 (appd, *J* = 9.2, 2H), 3.87 (s, 3H); <sup>13</sup>C NMR (125 MHz, 11.5 mg in MeOH-*d*<sub>4</sub> (0.5 mL)): δ 165.0,

151.4, 150.3, 147.6, 139.0, 129.3, 121.8 (q,  $J_{C-F} = 317$ ), 119.2, 115.7, 104.5, 101.4, 56.4; HRMS (ESI):  $m/z$  calculated for  $C_{12}H_{11}NOI$  ( $[M-HOTf-OTf]^+$ ): 311.9880, found: 311.9887.

#### 4-Methoxyphenyl(3-pyridyl)iodonium triflate **3b**

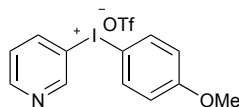

Isolated from **3b'** *via* deprotonation as an oily residue in 97% yield;  $^1H$  NMR (400 MHz, MeOH- $d_4$ )  $\delta$  9.19 (dd,  $J = 2.3, 0.5$ , 1H), 8.82 (dd,  $J = 4.8, 1.4$ , 1H), 8.56 (ddd,  $J = 8.4, 2.4, 1.4$ , 1H), 8.14 (appd,  $J = 9.2, 2H$ ), 7.56 (ddd,  $J = 8.3, 4.8, 0.7$ , 1H), 7.09 (appd,  $J = 9.2, 2H$ ), 3.86 (s, 3H);  $^{13}C$  NMR (100 MHz, MeOH- $d_4$ )  $\delta$  164.8, 154.3, 153.4, 143.6, 138.8, 128.2, 121.8 (q,  $J_{C-F} = 316$ ), 119.1, 116.1, 104.4, 56.4; HRMS (ESI):  $m/z$  calculated for  $C_{12}H_{11}NOI$  ( $[M-OTf]^+$ ): 311.9880, found: 311.9891.

#### Mesityl(3-pyridinium)iodonium bistriflate **3c'**

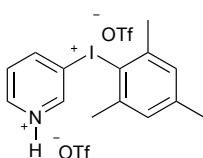

Synthesized according to Method A from **1b** and mesitylene in 70% yield as a beige solid; mp 153-155 °C;  $^1H$  NMR (400 MHz, 10.2 mg in MeOH- $d_4$  (0.5 mL))  $\delta$  9.12 (d,  $J = 1.9$ , 1H), 8.88 (dd,  $J = 5.0, 1.1$ , 1H), 8.55-8.50 (m, 1H), 7.75 (dd,  $J = 8.3, 5$ , 1H), 7.28 (s, 2H), 2.69 (s, 6H), 2.38 (s, 3H);  $^{13}C$  NMR (100 MHz, 20.0 mg in MeOH- $d_4$  (0.5 mL))  $\delta$  150.6, 150.0, 147.1, 146.6, 143.8, 131.7, 129.7, 122.4, 121.7 (q,  $J_{C-F} = 317$ ), 113.4, 27.1, 21.1; HRMS (ESI):  $m/z$  calculated for  $C_{14}H_{15}NI$  ( $[M-HOTf-OTf]^+$ ): 324.0244, found: 324.0252.

#### Mesityl(3-pyridyl)iodonium triflate **3c**

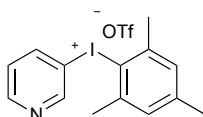

Isolated from **3c'** *via* deprotonation as a white solid in 92% yield; mp 173-175 °C;  $^1H$  NMR (400 MHz, MeOH- $d_4$ )  $\delta$  8.99 (d,  $J = 2$ , 1H), 8.79 (dd,  $J = 4.4, 1.2$ , 1H), 8.34 (ddd,  $J = 8.4, 2.4, 1.2$ , 1H), 7.54 (ddd,  $J = 8.4, 4.8, 0.8$ , 1H), 7.26 (s, 2H), 2.68 (s, 6H), 2.37 (s, 3H);  $^{13}C$  NMR (100 MHz, MeOH- $d_4$ )  $\delta$  153.7, 153.3, 146.2, 143.5, 143.1, 131.5, 128.6, 122.3, 121.8 (q,  $J_{C-F} = 316$ ), 113.8, 27.1, 21.0; HRMS (ESI):  $m/z$  calculated for  $C_{14}H_{15}NI$  ( $[M-OTf]^+$ ): 324.0244, found: 324.0231.

#### 2,4,6-Triisopropylphenyl(3-pyridinium)iodonium bistriflate **3d'**

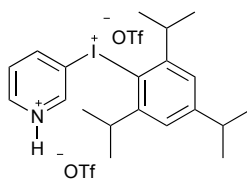

Synthesized according to Method A from **1a** and 1,3,5-triisopropylbenzene in 59% yield as a white solid; mp 149-150 °C;  $^1\text{H}$  NMR (400 MHz, 5.0 mg in MeOH- $d_4$  (0.5 mL))  $\delta$  9.0 (d,  $J$  = 0.4, 1H), 8.82 (dd,  $J$  = 4.8, 1.3, 1H), 8.34 (ddd,  $J$  = 8.3, 2.3, 1.3, 1H), 7.64 (ddd,  $J$  = 8.4, 4.8, 0.8, 1H), 7.37 (s, 2H), 3.46-3.40 (m, 2H), 3.06-2.99 (m, 1H), 1.31 (d,  $J$  = 6.8, 12H), 1.27, (d,  $J$  = 7.0, 6H);  $^{13}\text{C}$  NMR (100 MHz, 20.0 mg in MeOH- $d_4$  (0.5 mL))  $\delta$  157.6, 153.6, 151.0, 150.6, 145.9, 129.5, 126.8, 123.3, 121.8 (q,  $J_{\text{C-F}}$  = 316), 114.1, 40.8, 35.4, 24.5, 24.0; HRMS (ESI):  $m/z$  calculated for  $\text{C}_{20}\text{H}_{17}\text{NI}$  ( $[\text{M-HOTf-OTf}]^+$ ): 408.1183, found: 408.1192.

#### 4-Fluorophenyl(3-pyridinium)iodonium bistriflate **3e'**

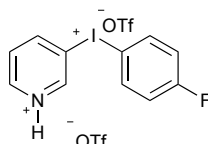

Synthesized according to Method A from **1a** and fluorobenzene in 84% yield as an off-white solid; mp 196-200 °C;  $^1\text{H}$  NMR (400 MHz, 10.0 mg in MeOH- $d_4$  (0.5 mL))  $\delta$  9.37 (d,  $J$  = 2.0, 1H), 8.93 (dd, 5.1, 1.3, 1H), 8.87-8.83 (m, 1H), 8.36-8.30 (m, 2H), 7.78 (dd,  $J$  = 8.4, 5.1, 1H), 7.38-7.30 (m, 2H);  $^{19}\text{F}$  NMR (376 MHz, 12.8 mg in MeOH- $d_4$  (0.5 mL))  $\delta$  -80.09 (s, 6F), -106.18 (s, 1F);  $^{13}\text{C}$  NMR (125 MHz, 23.7 mg in MeOH- $d_4$  (0.5 mL))  $\delta$  166.8 (d,  $J$  = 254), 151.0, 149.7, 149.0, 140.0 (d,  $J$  = 10), 129.7, 121.8 (q,  $J_{\text{C-F}}(^{\text{-OTf}})$  = 317), 120.9 (appd,  $J_{\text{C-F}}$  = 23), 115.5, 110.1, (d,  $J_{\text{C-F}}$  = 3); HRMS (ESI):  $m/z$  calculated for  $\text{C}_{11}\text{H}_8\text{NFI}$  ( $[\text{M-HOTf-OTf}]^+$ ): 299.9680, found: 299.9684.

#### 4-fluorophenyl(3-pyridyl)iodonium triflate **3e**

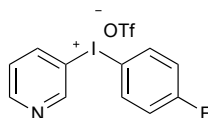

Isolated from **3e'** *via* deprotonation as a white solid in 85% yield; mp 140-141 °C;  $^1\text{H}$  NMR (400 MHz, MeOH- $d_4$ )  $\delta$  9.24 (d,  $J$  = 1.9, 1H), 8.84 (dd,  $J$  = 4.8, 1.8, 1H), 8.63 (ddd,  $J$  = 8.4, 2.3, 1.4, 1H), 8.35-8.25 (m, 2H), 7.58 (ddd,  $J$  = 8.3, 4.7, 0.6, 1H), 7.38-7.28 (m, 2H);  $^{19}\text{F}$  NMR (376 MHz, MeOH- $d_4$ )  $\delta$  -80.08 (s, 3F), -106.60 (s, 1F);  $^{13}\text{C}$  NMR (100 MHz, MeOH- $d_4$ )  $\delta$  166.6 (d,  $J$  = 253), 154.5, 153.7, 144.0, 139.6 (d,  $J_{\text{C-F}}$  = 9), 128.3, 121.8 (q,  $J_{\text{C-F}}(^{\text{-OTf}})$  = 317), 120.8 (d,  $J_{\text{C-F}}$  = 23), 116.1, 109.9 (d,  $J_{\text{C-F}}$  = 3); HRMS (ESI):  $m/z$  calculated for  $\text{C}_{11}\text{H}_8\text{NFI}$  ( $[\text{M-OTf}]^+$ ): 299.9680, found: 299.9692.

#### Mesityl(6-chloro-3-pyridyl)iodonium triflate **3f**

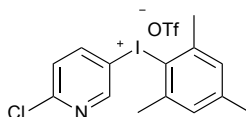

Synthesized according to Method A from **1b** and mesitylene in 73% yield as a brown solid; mp 161-163 °C;  $^1\text{H}$  NMR (400 MHz, MeOH- $d_4$ )  $\delta$  8.82 (dd,  $J$  = 2.5, 0.5, 1H), 8.28 (dd,  $J$  = 8.6, 2.5, 1H), 7.58 (dd,  $J$  = 8.5, 0.6, 1H), 7.26 (s, 2H), 2.68 (s, 6H), 2.37 (s, 3H);  $^{13}\text{C}$  NMR (125 MHz, MeOH- $d_4$ )  $\delta$  155.9, 154.3, 146.3, 145.5, 143.5, 131.5, 129.2, 122.4, 121.8 (q,  $J_{\text{C-F}}$  = 317), 111.4, 27.1, 21.0; HRMS (ESI):  $m/z$  calculated for  $\text{C}_{14}\text{H}_{14}\text{ClNI}$  ( $[\text{M-OTf}]^+$ ): 357.9854, found: 357.9843.

#### 4-Methoxyphenyl(3-quinolinium)iodonium bistriflate **3g'**

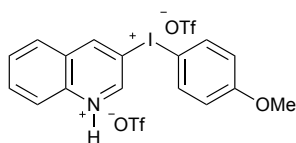

Synthesized according Method B from **1c**<sup>[2]</sup> and anisole (**2b**) in 90% yield as a white solid; mp 193-196 °C; <sup>1</sup>H NMR (400 MHz, 7.2 mg in MeOH-*d*<sub>4</sub> (0.5 mL)) δ 9.51 (appd, *J* = 2.0, 1H), 9.47 (appd, *J* = 2.0, 2H), 8.22 (appd, *J* = 9, 2H), 8.19-8.14 (m, 2H), 8.09-8.04 (m, 1H), 7.92-7.85 (m, 1H), 7.09 (appd, *J* = 9.2, 2H), 3.84 (s, 3H); <sup>13</sup>C NMR (100 MHz, MeOH-*d*<sub>4</sub>) δ 164.9, 150.8, 150.3, 139.1, 136.8, 131.5, 130.9, 130.6, 125.9, 121.8, (q, *J*<sub>C-F</sub> = 316), 119.2, 109.6, 104.9, 101.4, 56.4; HRMS (ESI): *m/z* calculated for C<sub>16</sub>H<sub>13</sub>NOI ([M-HOTf-OTf])<sup>+</sup>: 362.0036, found: 362.0041.

#### 4-Methoxyphenyl(3-quinolinyl)iodonium triflate **3g**

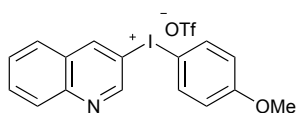

Isolated from **13g'** *via* deprotonation in 87% yield as a white solid; mp 143-144 °C; <sup>1</sup>H NMR (400 MHz, MeOH-*d*<sub>4</sub>) δ 9.35 (d, *J* = 2.4, 1H), 9.27 (d, *J* = 2, 2H), 8.20 (appd, *J* = 9.2, 1H), 8.11 (d, *J* = 8.8, 1H), 8.04 (d, *J* = 8.4, 1H), 7.98-7.92 (m, 1H), 7.81-7.75 (m, 1H), 7.08 (appd, *J* = 9.2, 2H), 3.84 (s, 3H); <sup>13</sup>C NMR (100 MHz, MeOH-*d*<sub>4</sub>) δ 164.7, 152.5, 149.1, 145.2, 138.7, 134.2, 130.6, 130.1, 130.0, 129.8, 121.8 (q, *J*<sub>C-F</sub> = 317), 119.1, 111.5, 104.7, 56.4; HRMS (ESI): *m/z* calculated for C<sub>16</sub>H<sub>13</sub>NOI ([M-OTf])<sup>+</sup>: 362.0036, found: 362.0031.

#### Mesityl(3-quinolinium)iodonium bistriflate **3h'**

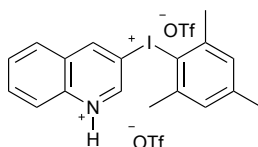

Synthesized according to Method A from **1c**<sup>[2]</sup> and mesitylene in 77% yield as a light brown solid; mp 155-156 °C; <sup>1</sup>H NMR (400 MHz, 5.7 mg in MeOH-*d*<sub>4</sub> (0.5 mL)) δ 9.22 (d, *J* = 2.0, 1H), 9.15 (d, *J* = 2.0, 1H), 8.15 (d, *J* = 8.8, 1H), 8.09 (d, *J* = 8.4, 1H), 8.04-7.99 (m, 1H), 7.85-7.79 (m, 1H), 7.27 (s, 2H), 2.74 (s, 6H), 2.36 (s, 3H); <sup>13</sup>C NMR (100 MHz, MeOH-*d*<sub>4</sub>) δ 150.2, 149.5, 146.5, 144.2, 143.8, 136.7, 131.6, 131.4, 131.2, 130.5, 125.8, 122.7, 121.7 (q, *J*<sub>C-F</sub> = 316), 107.3, 27.2, 21.0; HRMS (ESI): *m/z* calculated for C<sub>18</sub>H<sub>17</sub>NI ([M-HOTf-OTf])<sup>+</sup>: 374.0400, found: 374.0399.

#### 2,4,6-Triisopropylphenyl(3-quinolinium)iodonium bistriflate **3i'**

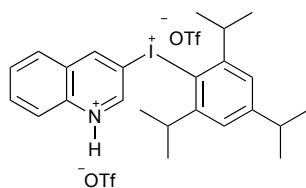



Synthesized according to Method A from **1c**<sup>[2]</sup> and 1,3,5-triisopropylbenzene in 82% as an off-white solid; mp 135-138 °C; <sup>1</sup>H NMR (400 MHz, 10.4 mg in MeOH-*d*<sub>4</sub> (0.5 mL)) δ 9.18 (s, 1H), 9.16 (s, 1H), 8.15 (appd, *J* = 8.4, 1H), 8.10 (appd, *J* = 8, 1H), 8.06-8.00 (m, 1H), 7.87-7.81 (m, 1H), 7.37 (s, 2H), 3.61-3.51 (m, 2H), 3.06-2.97 (m, 1H), 1.33 (d, *J* = 6.8, 12H), 1.26 (d, *J* = 6.8, 6H); <sup>13</sup>C NMR (100 MHz, MeOH-*d*<sub>4</sub>) δ 157.6, 153.7, 150.4, 148.1, 145.5, 136.2, 131.3, 131.0, 130.3, 127.1, 126.8, 123.9, 121.9 (q, *J*<sub>C-F</sub> = 316), 108.4, 40.9, 35.5, 24.7, 24.1; HRMS (ESI): *m/z* calculated for C<sub>24</sub>H<sub>29</sub>NI ([M-HOTf-OTf])<sup>+</sup>: 458.1339, found: 458.1314.

#### 4-Methoxyphenyl(3-pyrazolium)iodonium bistriflate **3j'**

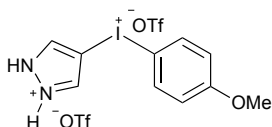

Synthesized according to Method B from **1d**<sup>[3]</sup> and anisole (**2b**) in 83% yield; mp 183-185 °C; <sup>1</sup>H NMR (400 MHz, 12.3 mg in MeOH-*d*<sub>4</sub> (0.5 mL)) δ 8.29 (s, 2H), 8.03 (appd, *J* = 9.2, 2H), 7.03 (d, *J* = 9.2, 2H), 3.84 (s, 3H); <sup>13</sup>C NMR (100 MHz, MeOH-*d*<sub>4</sub>) δ 164.3, 140.5, 137.7, 121.8 (q, *J*<sub>C-F</sub> = 316), 118.6, 106.2, 81.5, 56.3; HRMS (ESI): *m/z* calculated for C<sub>10</sub>H<sub>10</sub>N<sub>2</sub>OI ([M-HOTf-OTf])<sup>+</sup>: 300.9832, found: 300.9826.

#### 4-Methoxyphenyl(3-pyrazolyl)iodonium triflate **3j**

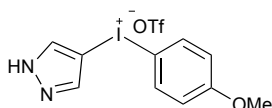

Isolated from **3j'** via deprotonation in 78% yield; mp 109-111 °C; <sup>1</sup>H NMR (400 MHz, MeOH-*d*<sub>4</sub>) δ 8.28 (s, 2H), 8.01 (d, *J* = 8.8, 2H), 7.03 (d, *J* = 9.2, 2H), 3.84 (s, 3H); <sup>13</sup>C NMR (100 MHz, MeOH-*d*<sub>4</sub>) δ 164.3, 140.6, 137.7, 121.8 (q, *J*<sub>C-F</sub> = 317), 118.6, 106.2, 81.2, 56.3; HRMS (ESI): *m/z* calculated for C<sub>10</sub>H<sub>10</sub>N<sub>2</sub>OI ([M-OTf])<sup>+</sup>: 300.9832, found: 300.9843.

#### Mesityl(3-pyrazolium)iodonium bistriflate **3k'**

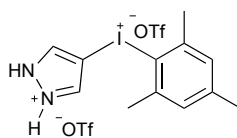

Synthesized according to Method A from **1d**<sup>[3]</sup> and mesitylene in 75% yield as a brown solid; 169-171 °C; <sup>1</sup>H NMR (400 MHz, 5.8 mg in MeOH-*d*<sub>4</sub> (0.5 mL)) δ 8.23 (s, 2H), 7.19 (s, 2H), 2.72 (s, 6H), 2.34 (s, 3H); <sup>13</sup>C NMR (100 MHz, MeOH-*d*<sub>4</sub>) δ 145.5, 142.6, 140.3, 131.0, 124.2, 121.8 (q, *J*<sub>C-F</sub> = 316), 79.0, 27.0, 21.0; HRMS (ESI): *m/z* calculated for C<sub>12</sub>H<sub>14</sub>N<sub>2</sub>I ([M-OTf])<sup>+</sup>: 313.0196, found: 313.0192.

#### Mesityl(3-pyrazolyl)iodonium triflate **3k**

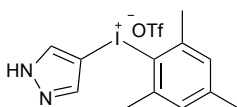

Isolated from **3k'** via deprotonation in 72% yield as a brown solid; mp 186-189 °C; <sup>1</sup>H NMR (400 MHz, MeOH-*d*<sub>4</sub>) δ 8.20 (s, 2H), 7.18 (s, 2H), 2.72 (s, 6H), 2.33 (s, 3H); <sup>13</sup>C NMR (100 MHz, MeOH-*d*<sub>4</sub>) δ 145.5,

142.6, 140.4, 131.0, 124.2, 121.8 (q,  $J_{C-F} = 316$ ), 78.7, 27.0, 21.0; HRMS (ESI):  $m/z$  calculated for  $C_{12}H_{14}N_2I$  ( $[M-OTf]^+$ ): 313.0196, found: 313.0196.

### 2,4,6-Triisopropylphenyl(3-pyrazolium)iodonium bistriflate 3I'

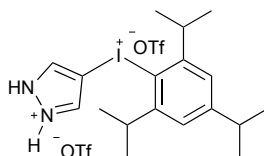

Synthesized according to Method A from **1d**<sup>[3]</sup> and 1,3,5-triisopropylbenzene in 75% yield as a white solid; mp 175-179 °C;  $^1H$  NMR (400 MHz, 4.7 mg in MeOH- $d_4$  (0.5 mL))  $\delta$  8.16 (s, 2H), 7.28 (s, 2H), 3.57-3.47 (m, 2H), 3.02-2.94 (m, 1H), 1.34 (d,  $J = 6.8$ , 12H), 1.25 (d,  $J = 6.8$ , 6H);  $^{13}C$  NMR (100 MHz, MeOH- $d_4$ )  $\delta$  156.5, 152.5, 140.1, 126.0, 125.7, 121.8 (q,  $J_{C-F} = 317$ ), 79.8, 40.4, 35.4, 24.4, 24.0; HRMS (ESI):  $m/z$  calculated for  $C_{18}H_{26}N_2I$  ( $[M-HOTf-OTf]^+$ ): 397.1135, found: 397.1142.

### 2,4,6-triisopropylphenyl(3-pyrazolyl)iodonium triflate 3I

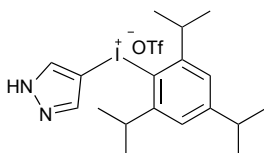

Isolated from **3I'** via deprotonation in 90% yield as a white solid; mp 166-168 °C;  $^1H$  NMR (400 MHz, MeOH- $d_4$ )  $\delta$  8.11 (s, 2H), 7.27 (s, 2H), 3.60-3.48 (m, 2H), 3.04-2.90 (m, 1H), 1.34 (d,  $J = 6.8$ , 12H), 1.25 (d,  $J = 6.8$ , 6H);  $^{13}C$  NMR (100 MHz, MeOH- $d_4$ )  $\delta$  156.4, 152.5, 140.5, 125.9, 125.8, 121.8 (q,  $J_{C-F} = 316$ ), 79.0, 40.4, 35.4, 24.4, 24.0; HRMS (ESI):  $m/z$  calculated for  $C_{18}H_{26}N_2I$  ( $[M-OTf]^+$ ): 397.1135, found: 397.1127.

### Mesityl(2,5-dimethyl-3-pyrazolium)iodonium bistriflate 3m'

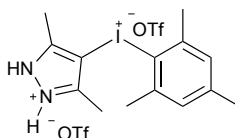

Synthesized according to Method A from **1e** and mesitylene in 67% yield as a slightly brown solid; mp 148-152 °C;  $^1H$  NMR (400 MHz, 5.9 mg in MeOH- $d_4$  (0.5 mL))  $\delta$  7.20 (s, 2H), 2.64 (s, 6H), 2.35 (s, 9H);  $^{13}C$  NMR (100 MHz, 28.2 mg in MeOH- $d_4$  (0.5 mL))  $\delta$  150.0, 145.4, 142.9, 131.4, 121.3, 121.8 (q,  $J_{C-F} = 316$ ), 81.7, 26.7, 20.9, 12.2; HRMS (ESI):  $m/z$  calculated for  $C_{14}H_{18}N_2I$  ( $[M-HOTf-OTf]^+$ ): 341.0509, found: 341.0515.

### Mesityl(2,5-dimethyl-3-pyrazolyl)iodonium triflate 3m

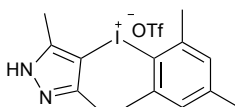

Isolated from **3m'** via deprotonation as a light brown solid in 92% yield; mp 178-180 °C;  $^1H$  NMR (400 MHz, MeOH- $d_4$ )  $\delta$  7.20 (s, 2H), 2.64 (s, 6H), 2.35 (s, 9H);  $^{13}C$  NMR (100 MHz, MeOH- $d_4$ )  $\delta$  145.3, 142.9,

131.3, 121.3, 121.8 (q,  $J_{C-F} = 317$ ), 80.9, 26.6, 20.9, 12.3; HRMS (ESI):  $m/z$  calculated for  $C_{14}H_{18}N_2I$  ([M-OTf])<sup>+</sup>: 341.0509, found: 341.0513.

### 2,4,6-Triisopropylphenyl(2,5-dimethyl-3-pyrazolium)iodonium bistriflate 3n'

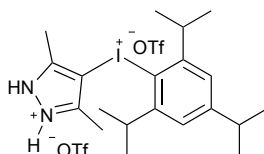

Synthesized according to Method A from **1e** and 1,3,5-triisopropylbenzene in 70% yield as an off-white solid; mp 141-142 °C; <sup>1</sup>H NMR (400 MHz, 25.3 mg in MeOH-*d*<sub>4</sub> (0.5 mL)) δ 7.30 (s, 2H), 3.41-3.34 (m, 2H), 3.03-2.96 (m, 1H), 2.38 (s, 6H), 1.29 (d,  $J = 6.8$ , 12H), 1.25 (d,  $J = 6.8$ , 6H); <sup>13</sup>C NMR (100 MHz, MeOH-*d*<sub>4</sub>) δ 156.5, 153.0, 149.7, 126.3, 122.9, 121.8 (q,  $J_{C-F} = 316$ ), 82.0, 40.5, 35.3, 24.4, 24.0, 12.3; HRMS (ESI):  $m/z$  calculated for  $C_{20}H_{30}N_2I$  ([M-HOTf-OTf])<sup>+</sup>: 425.1448, found: 425.1451.

### 2,4,6-Triisopropylphenyl(2,5-dimethyl-3-pyrazolyl)iodonium triflate 3n

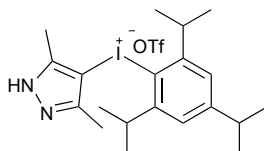

Isolated from **3n'** *via* deprotonation in 97% as a white solid; mp 162-164 °C; <sup>1</sup>H NMR (400 MHz, MeOH-*d*<sub>4</sub>) δ 7.30 (s, 2H), 3.42-3.34 (m, 2H), 3.03-2.95 (m, 1H), 2.37 (s, 6H), 1.29 (d,  $J = 6.4$ , 1H), 1.26 (d,  $J = 7.2$ , 6H); <sup>13</sup>C NMR (100 MHz, MeOH-*d*<sub>4</sub>) δ 156.5, 153.0, 149.6, 126.3, 122.9, 121.8 (q,  $J_{C-F} = 316$ ), 81.5, 40.4, 35.3, 24.4, 24.0, 12.4; HRMS (ESI):  $m/z$  calculated for  $C_{20}H_{30}N_2I$  ([M-OTf])<sup>+</sup>: 425.1448, found: 425.1438.

### 5-(1,3-Dimethyluracilyl)(3-pyridinium)iodonium bistriflate 3o'

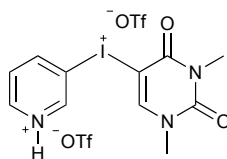

Synthesized according to Method A from **1a** and *N,N*-dimethyluracil in 86% yield as a white solid; mp 172-173 °C; <sup>1</sup>H NMR (400 MHz, MeOH-*d*<sub>4</sub>) δ 9.37 (s, 1H), 8.97-8.88 (m, 3H), 7.84 (dd,  $J = 8.3, 5.2$ , 1H), 3.50 (s, 3H), 3.34 (s, 3H); <sup>13</sup>C-NMR (100 MHz, MeOH-*d*<sub>4</sub>) δ 160.9, 156.4, 152.3, 150.7, 148.1, 129.2, 121.8 (q,  $J = 317$ ), 115.3, 89.4, 38.5, 29.8; HRMS (ESI):  $m/z$  calculated for  $C_{11}H_{11}N_3O_2I$  ([M-HOTf-OTf])<sup>+</sup>: 343.9890, found: 343.9898.

### 5-(1,3-Dimethyluracilyl)(3-pyridyl)iodonium triflate 13o

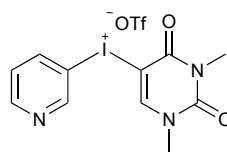

Isolated from **3o'** *via* deprotonation in 81% yield as a white solid; mp 133 °C (decomposed); <sup>1</sup>H NMR (400 MHz, MeOH-*d*<sub>4</sub>) δ 9.20 (appd, *J* = 2, 1H), 8.94 (s, 1H), 8.83 (dd, *J* = 4.7, 1.1, 1H), 8.60 (ddd, *J* = 8.3, 2.2, 1.5, 1H), 7.58 (ddd, 8.3, 4.8, 0.4, 1H), 3.49 (s, 3H), 3.34 (s, 3H); <sup>13</sup>C NMR (100 MHz, MeOH-*d*<sub>4</sub>) δ 160.9, 156.1, 154.7, 153.6, 152.3, 144.2, 128.2, 121.8 (q, *J*<sub>C-F</sub> = 317), 115.8, 89.1, 38.4, 29.8; HRMS (ESI): *m/z* calculated for C<sub>11</sub>H<sub>11</sub>N<sub>3</sub>O<sub>2</sub>I ([M-OTf])<sup>+</sup>: 343.9890, found: 343.9902.

## 4 Arylation of Phenols **4** to Diaryl Ethers **5**<sup>[4]</sup>

### Phenylpyridyl ether **5a**

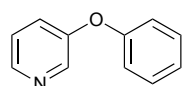

To a suspension of <sup>t</sup>BuOK (1.2 equiv, 0.6 mmol, 67 mg) in THF (1.5 mL) was added phenol **4a** (0.5 mmol, 47 mg) at 0 °C and the reaction was left to stir at this temperature for 15 min. Diaryliodonium salt **3b** (1.2 equiv, 0.6 mmol, 278 mg) was added in one portion and the reaction was stirred in an oil bath preheated to 40 °C and until TLC indicated complete consumption of **4a**. The reaction was then quenched with H<sub>2</sub>O at 0 °C, the organic phase separated and the water phase extracted with dichloromethane (3 × 10 mL). The combined organic phases were dried (Na<sub>2</sub>SO<sub>4</sub>), filtered, and concentrated *in vacuo*. The crude material was purified by flash chromatography (pentane:Et<sub>2</sub>O, 100:1 → pentane:Et<sub>2</sub>O, 25:1) to give diaryl ether **5a** in 88% yield as a transparent oil. Analytical data were in accordance with those previously reported.<sup>[5]</sup>

Product **5a** was also prepared according to the same protocol using the protonated salt **3b'** and 2.2 equiv of <sup>t</sup>BuOK, giving **5a** in 59% yield.

### 2,4-dimethylphenylpyridyl ether **5b**

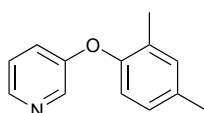

Compound **5b** was synthesized according to the experimental procedure described for product **5a** using 2,4-dimethylphenol **4b**, diaryliodonium salt **13b** and 1.1 equiv <sup>t</sup>BuOK. Isolated after column chromatography (pentane:Et<sub>2</sub>O, 100:1 → pentane:Et<sub>2</sub>O, 25:1) in 65% yield as a transparent oil. Analytical data were in accordance with those previously reported.<sup>[4]</sup>

Product **5b** was also prepared from the same protocol using the protonated salt **3b'** and 2.2 equiv of <sup>t</sup>BuOK, giving **5b** in 52% yield.

## 5 Arylation of Diethyl Methylmalonate **6** to Product **7**<sup>[6]</sup>

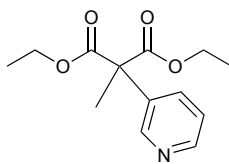

NaH (60% dispersed in mineral oil, 1.3 equiv, 0.65 mmol, 26 mg) was suspended in DMF (1 mL) and diethyl methylmalonate (**6**) (0.5 mmol, 88 mg) was added dropwise at 0 °C. The reaction was allowed to stir at rt for 10 min. A solution of diaryliodonium salt **3c** (1.3 equiv, 0.33 mmol, 308 mg) in DMF (1 mL) was added *via* cannula to the reaction mixture at 0 °C. The reaction mixture was then stirred at rt until TLC indicated complete consumption of **6**. The reaction was quenched with H<sub>2</sub>O at 0 °C, extracted with EtOAc (3 × 10 mL) and washed with H<sub>2</sub>O (1 × 20 mL) and brine (2 × 20 mL). The combined organic phases were dried (MgSO<sub>4</sub>) and concentrated *in vacuo*. The crude material was purified with flash chromatography (Pentane:EtOAc, 100:1 → Pentane:EtOAc, 6:1, the EtOAc contained 3% Et<sub>3</sub>N) to give **7** in 72% yield as a transparent oil; <sup>1</sup>H NMR (400 MHz, CDCl<sub>3</sub>) δ 8.63 (d, *J* = 2.4, 1H), 8.54 (d, *J* = 4.8, 1H), 7.72 (appd, *J* = 8.1, 1H), 7.31-7.25 (m, 1H), 4.32-4.16 (m, 4H), 1.89 (s, 3H), 1.26 (t, *J* = 7.1, 6H); <sup>13</sup>C NMR (100 MHz, CDCl<sub>3</sub>) δ 170.9, 149.1, 148.9, 135.5, 134.2, 123.0, 62.2, 57.4, 22.0, 14.1; HRMS (ESI): *m/z* calculated for C<sub>13</sub>H<sub>18</sub>NO<sub>4</sub> ([M+H])<sup>+</sup>: 252.1246, found: 252.1236.

Product **7** was also prepared from the same protocol using the protonated salt **3c'** and 2.3 equiv of NaH, giving **7** in 23% yield.

## 6 References

- [1] A. I. Vogel, B. S. Furniss, A. J. Hannaford, V. Rogers, P. W. G. Smith, A. R. Tatchell, *Vogel's Textbook of Practical Organic Chemistry*, **1978**.
- [2] A. Klapars, S. L. Buchwald, *J. Am. Chem. Soc.* **2002**, *124*, 14844-14845.
- [3] R. E. Sammelson, J. E. Casida, *J. Org. Chem.* **2003**, *68*, 8075-8079.
- [4] N. Jalalian, T. B. Petersen, B. Olofsson, *Chem. Eur. J.* **2012**, *18*, 14140-14149.
- [5] N. Jalalian, E. E. Ishikawa, L. F. Silva, B. Olofsson, *Org. Lett.* **2011**, *13*, 1552-1555.
- [6] C. H. Oh, J. S. Kim, H. H. Jung, *J. Org. Chem.* **1999**, *64*, 1338-1340.

## 7 Copies of NMR spectra

400 MHz  
MeOD

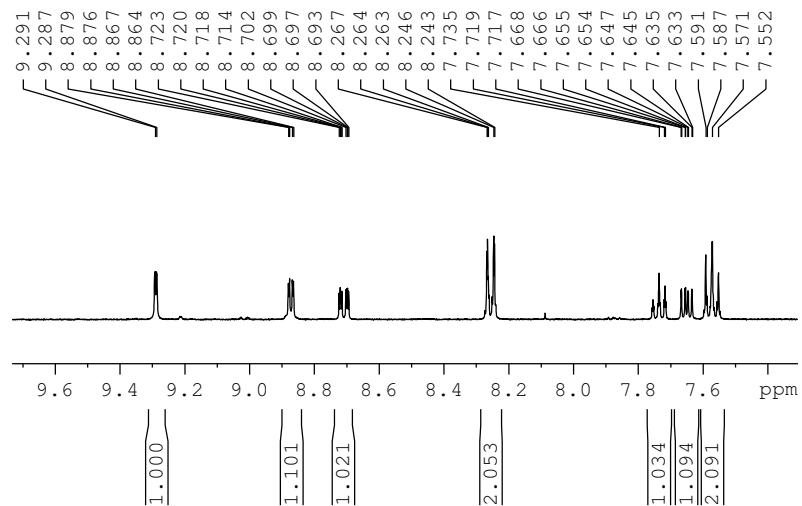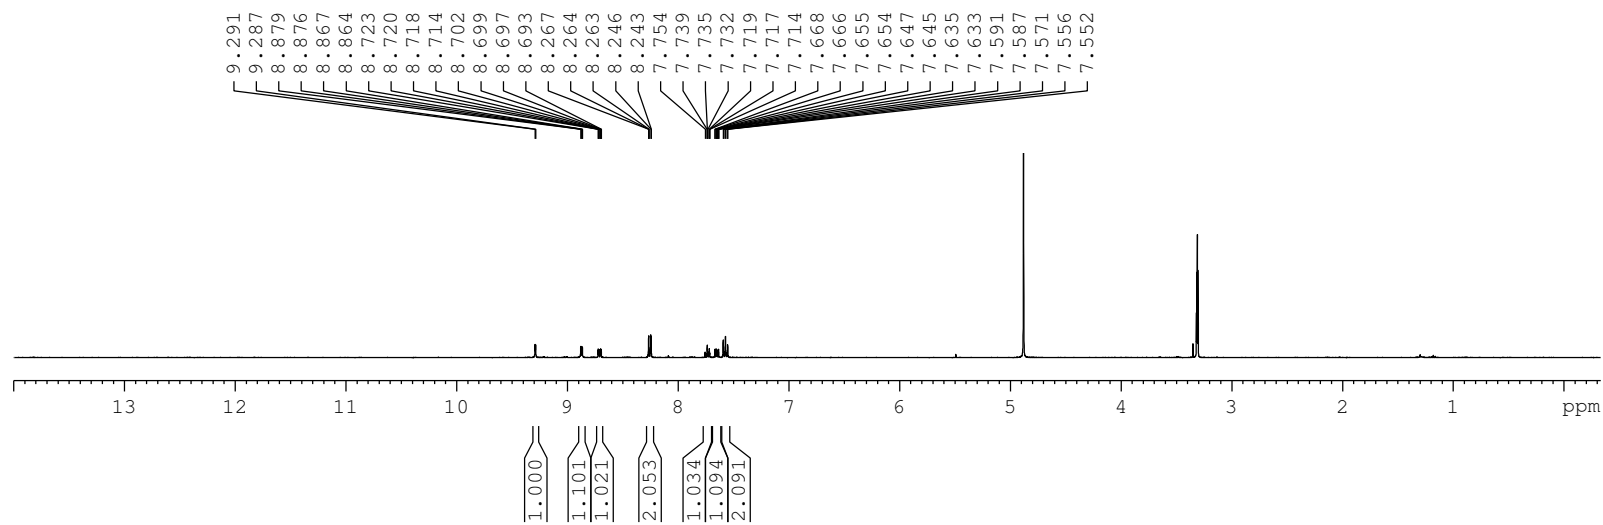

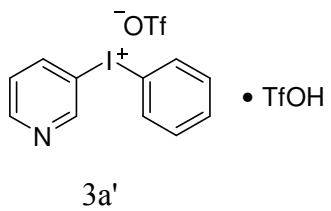

100 MHz  
MeOD

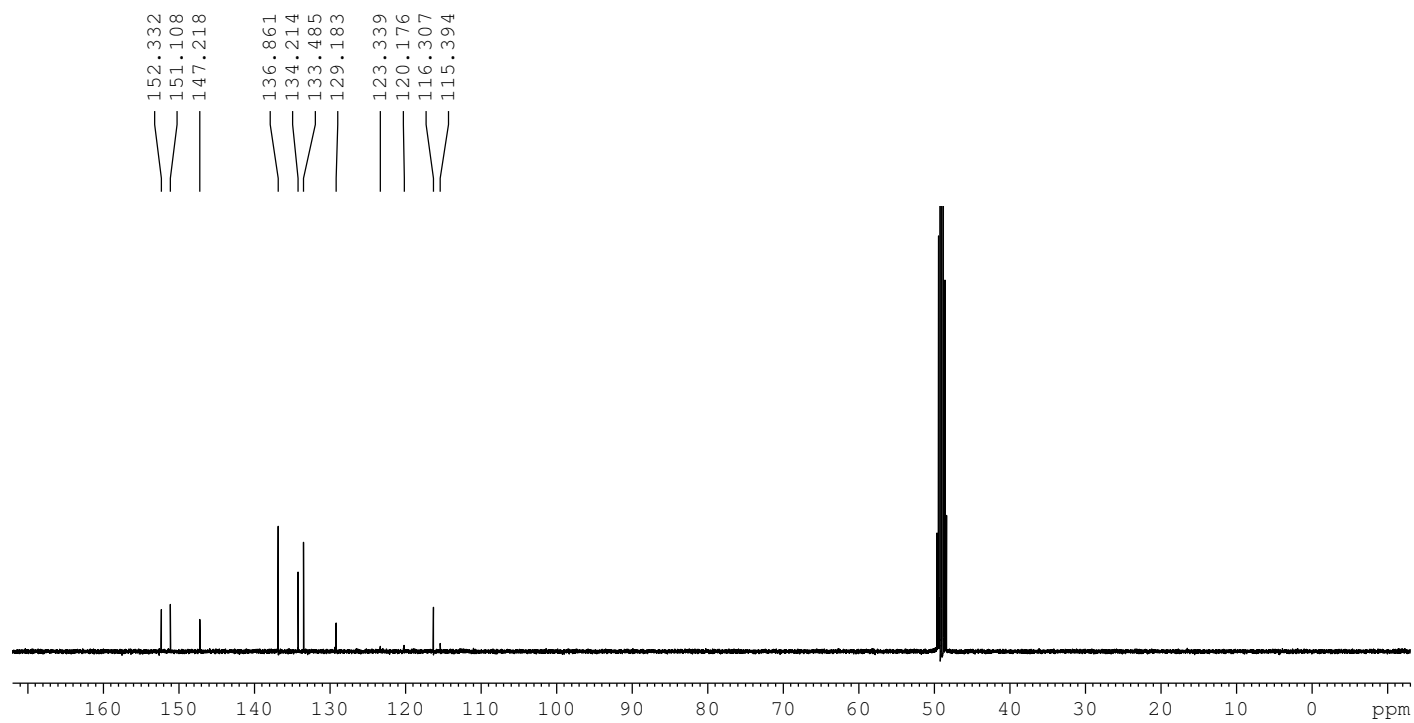

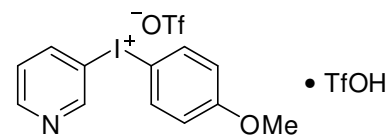

500 MHz  
MeOD

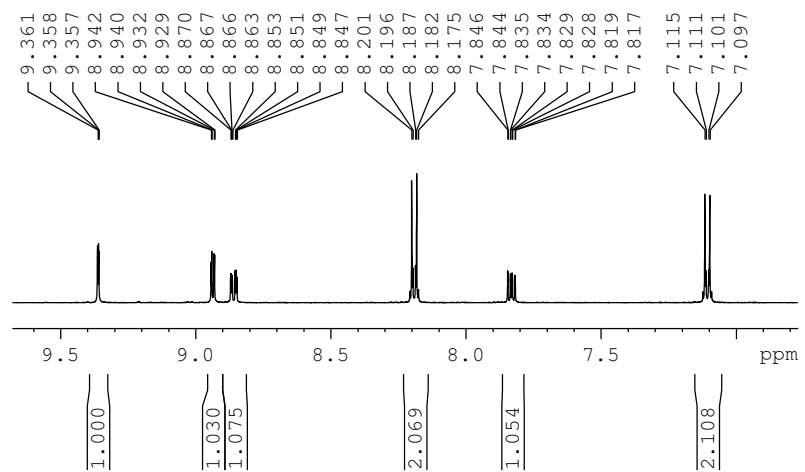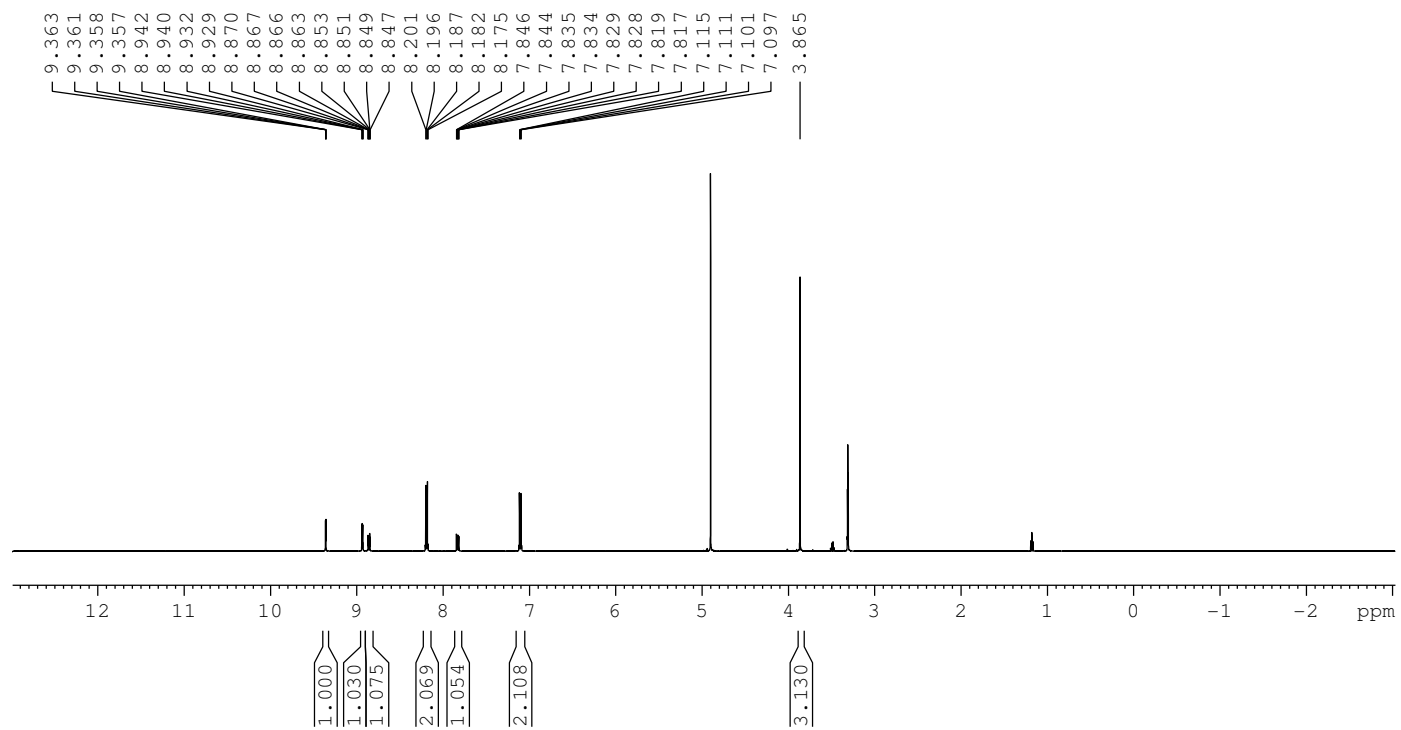



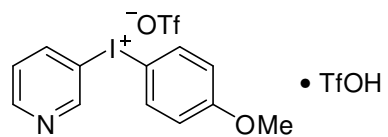

125 MHz  
MeOD

3b'

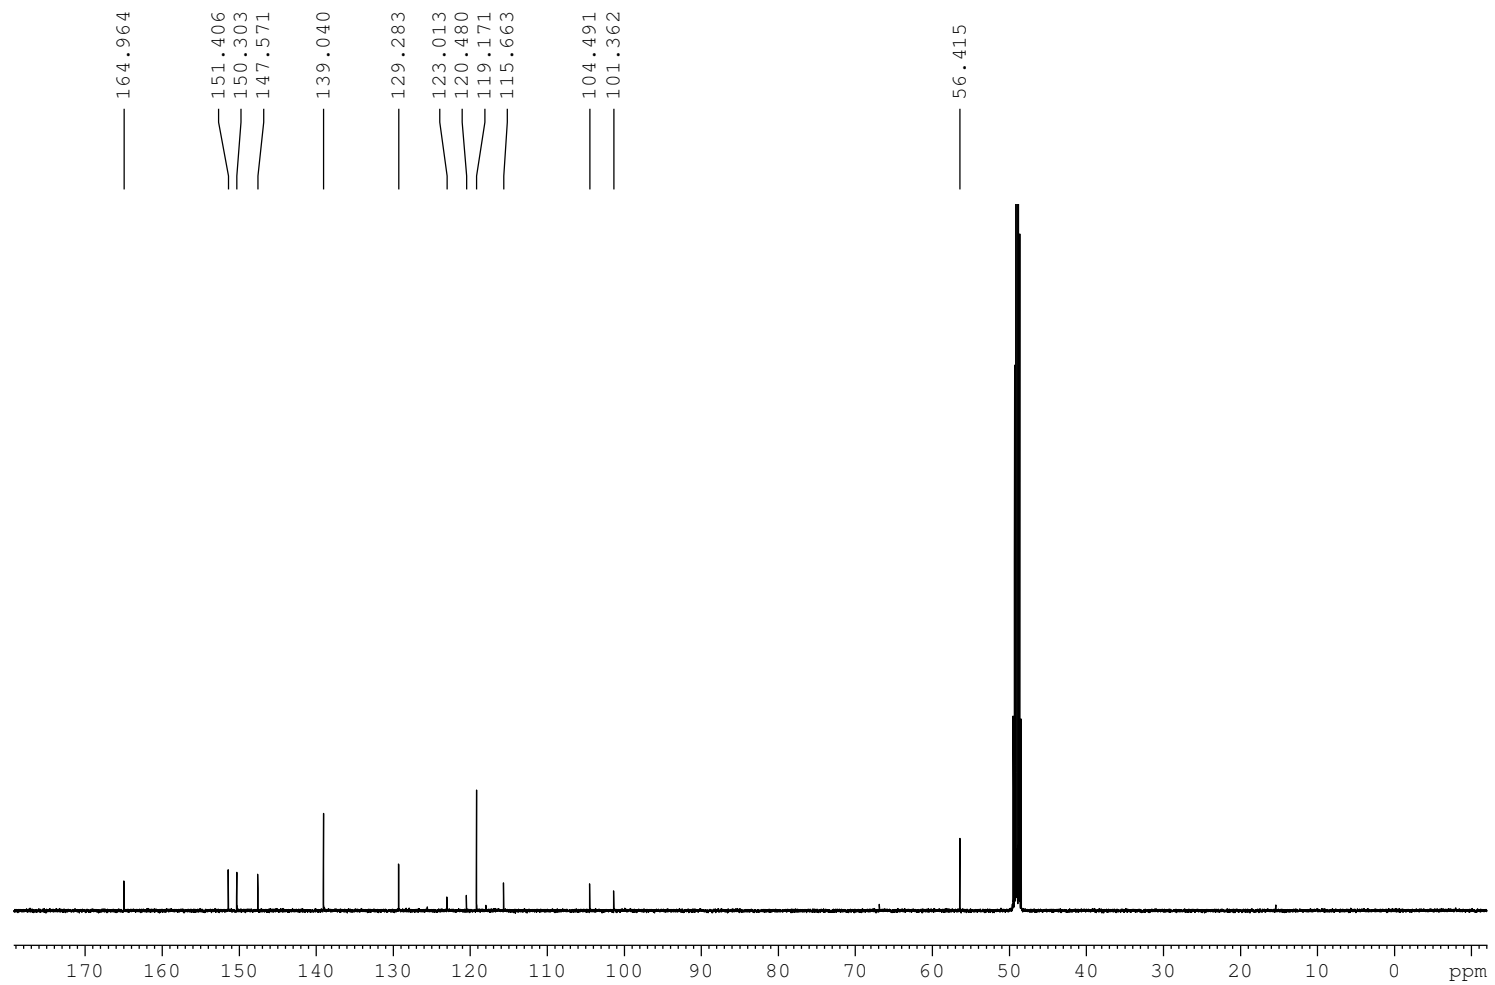

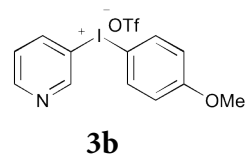

400 MHz  
MeOD

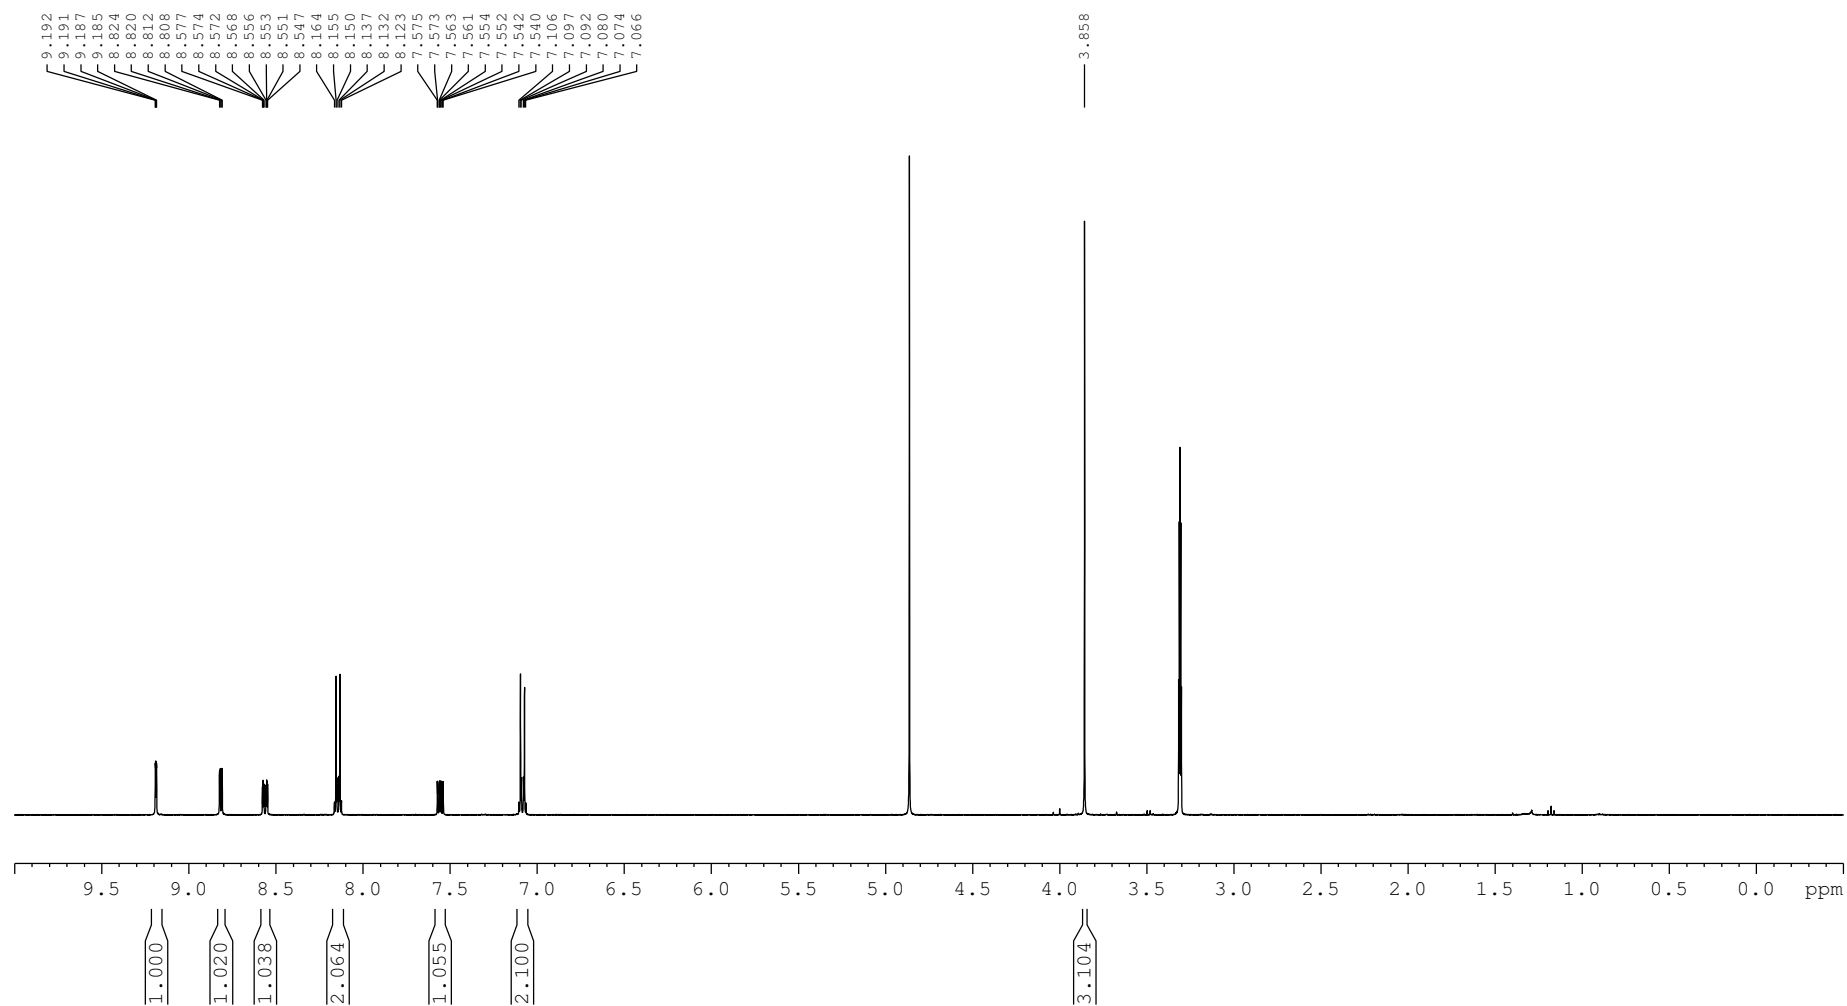

100 MHz  
MeOD

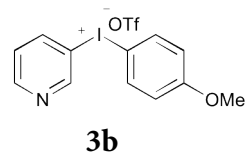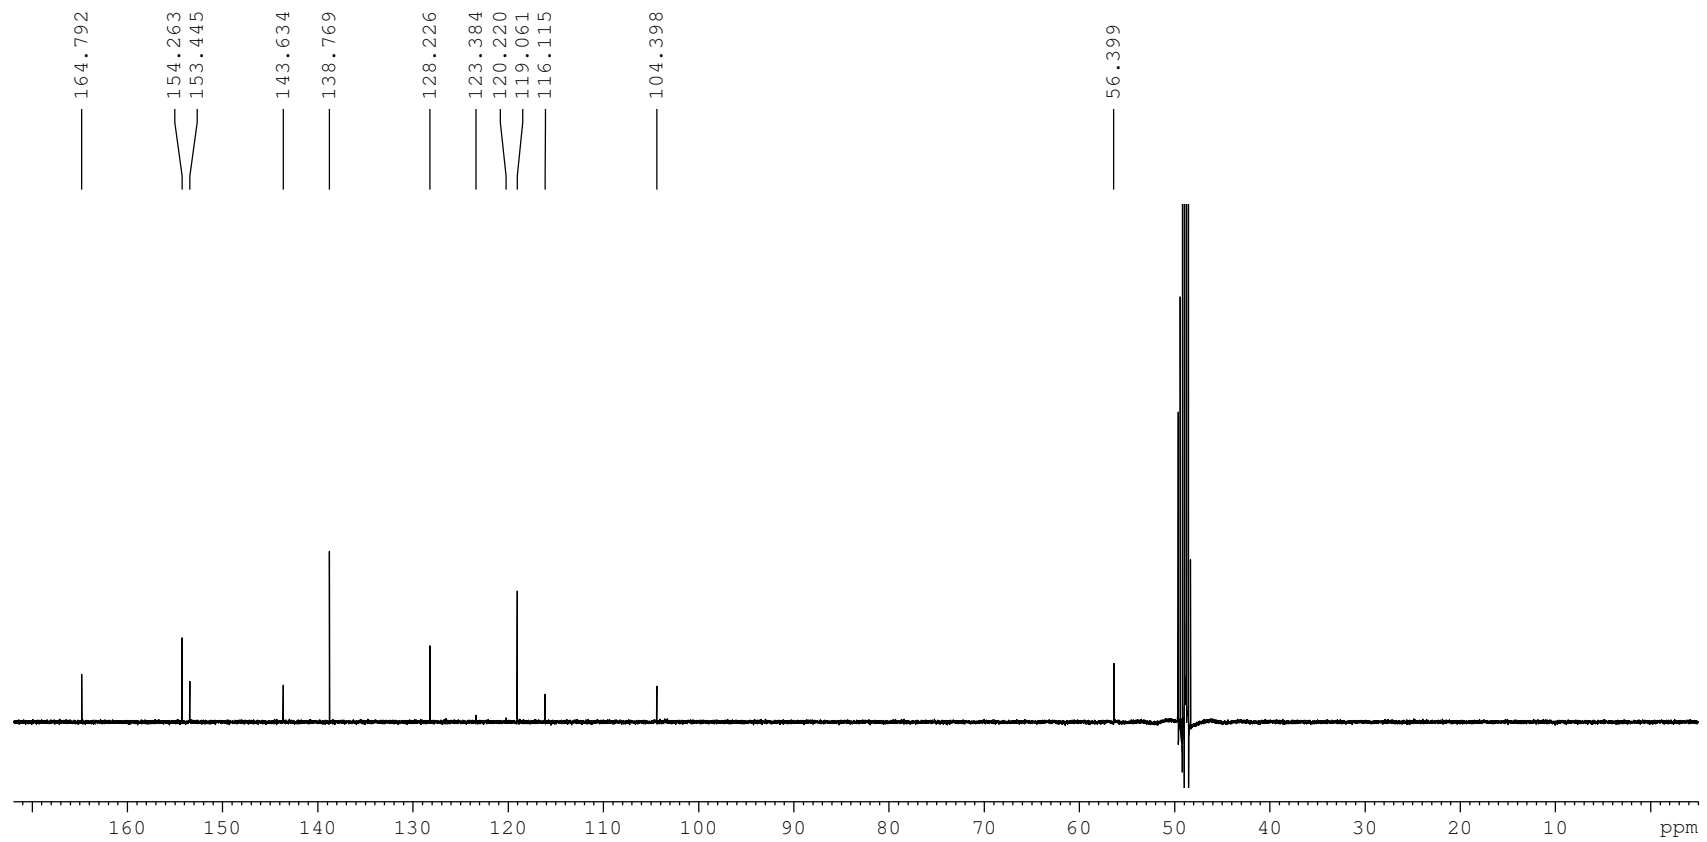

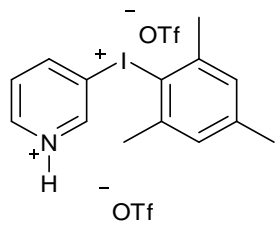

3c'

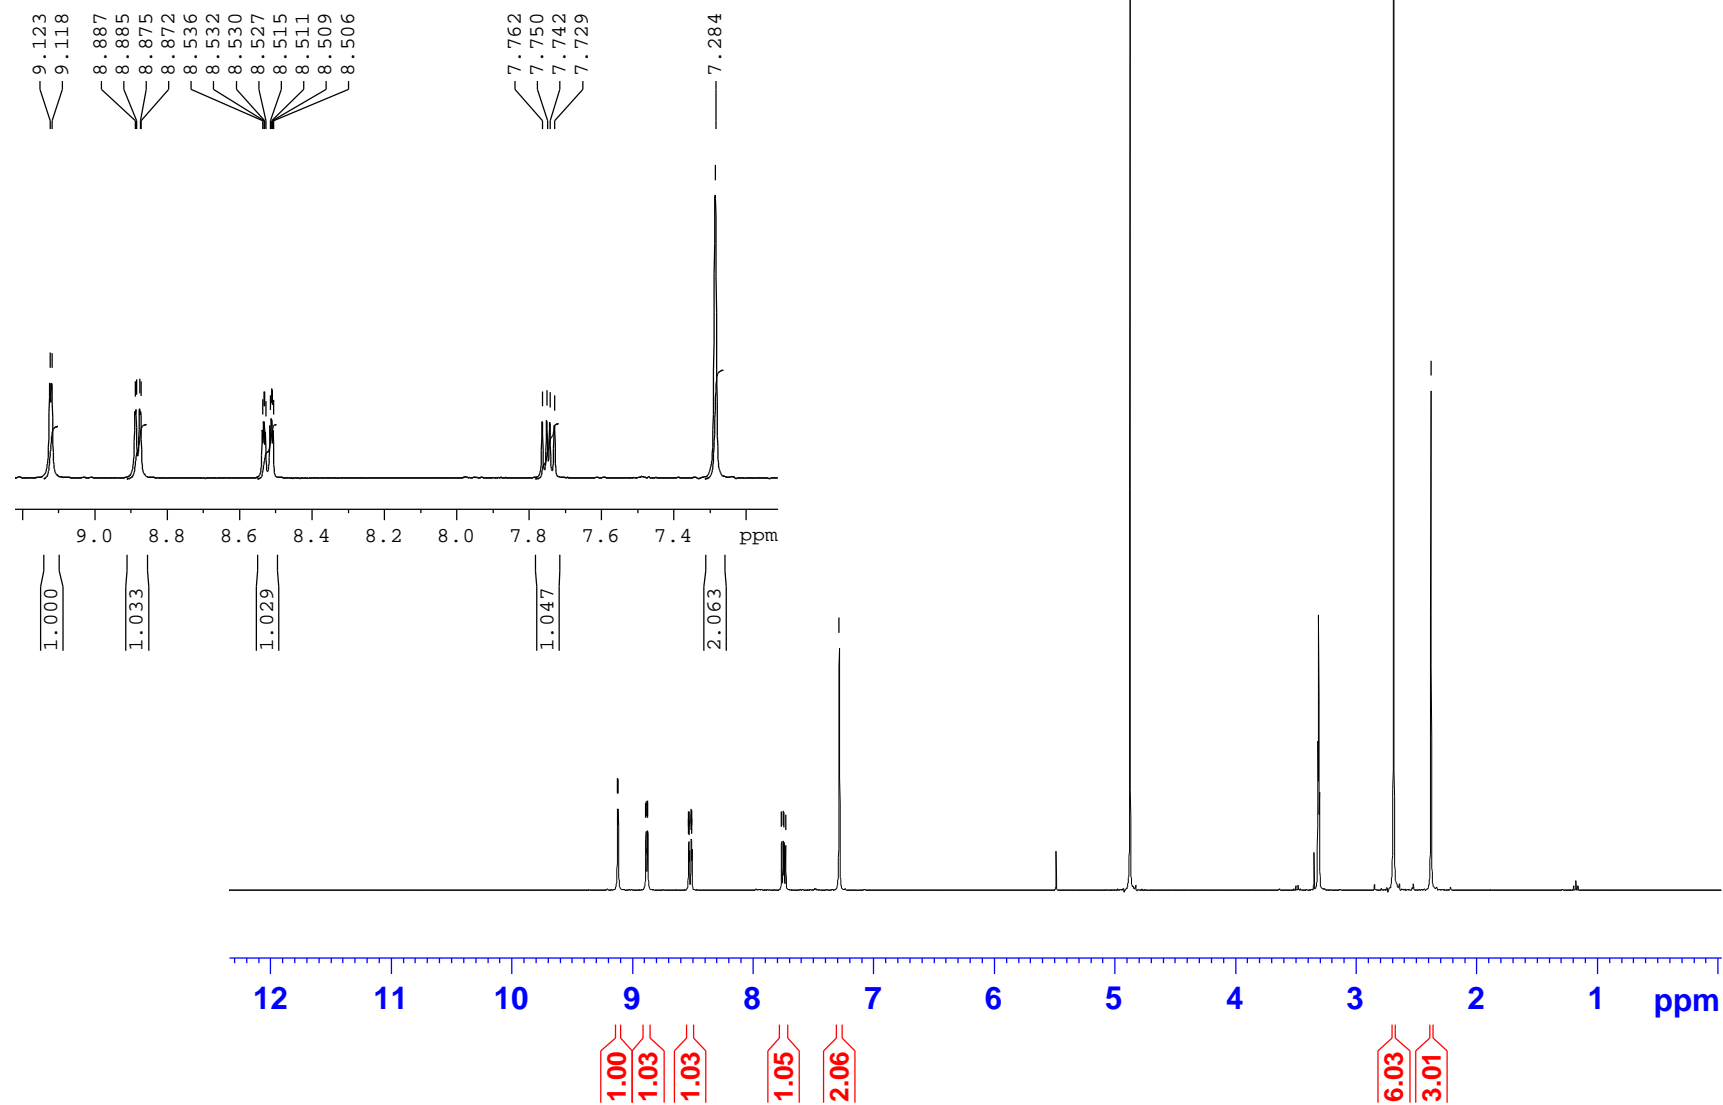

400 MHz  
MeOD

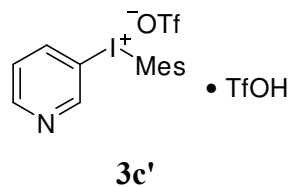

100 MHz  
MeOD

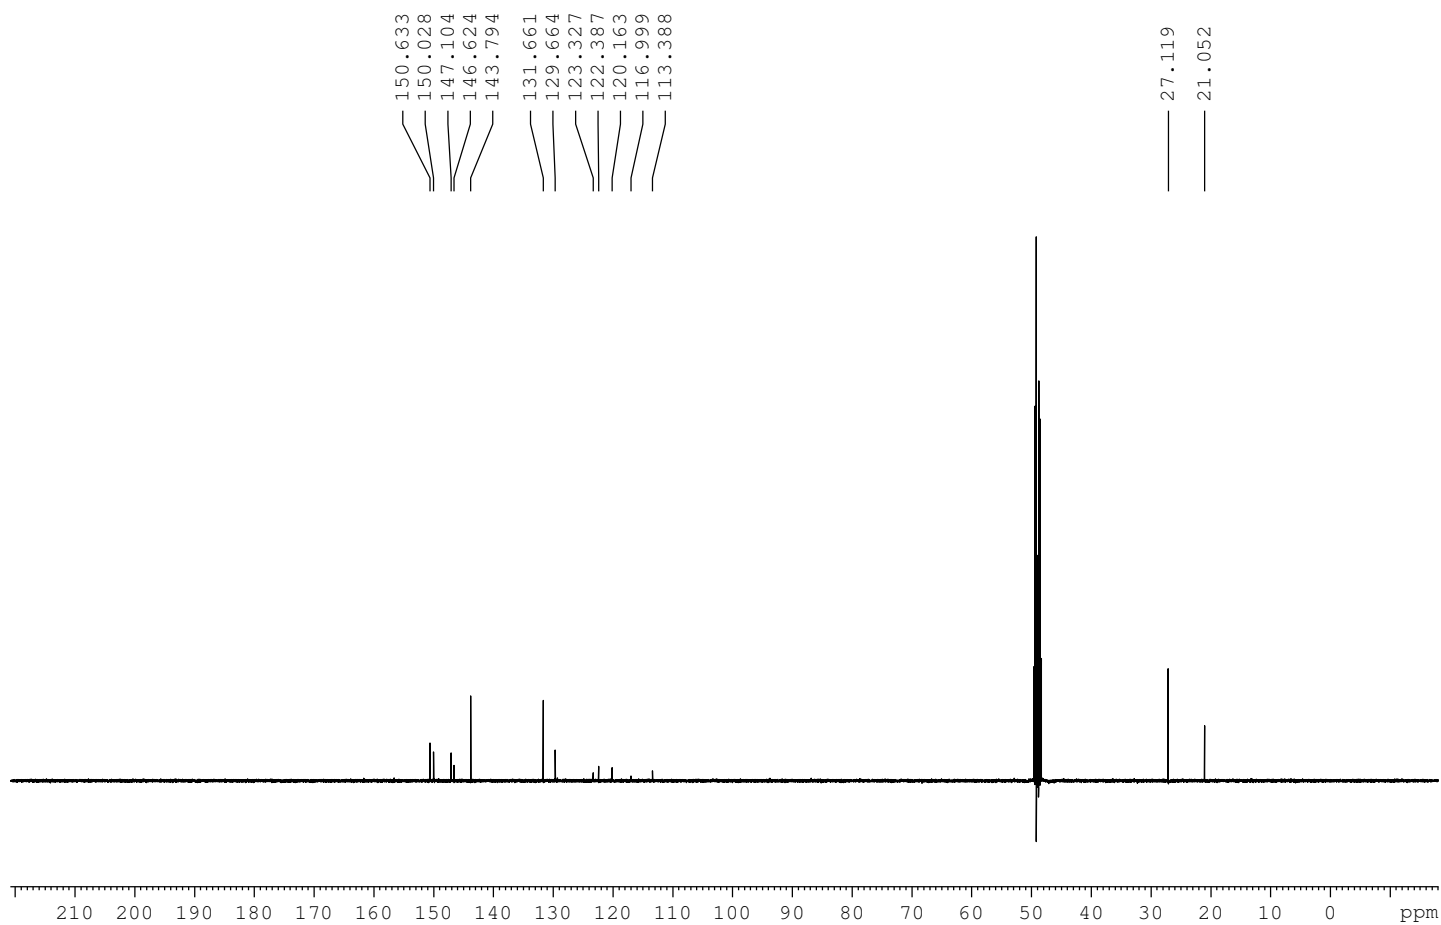

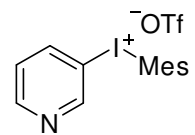

3c

400 MHz  
MeOD

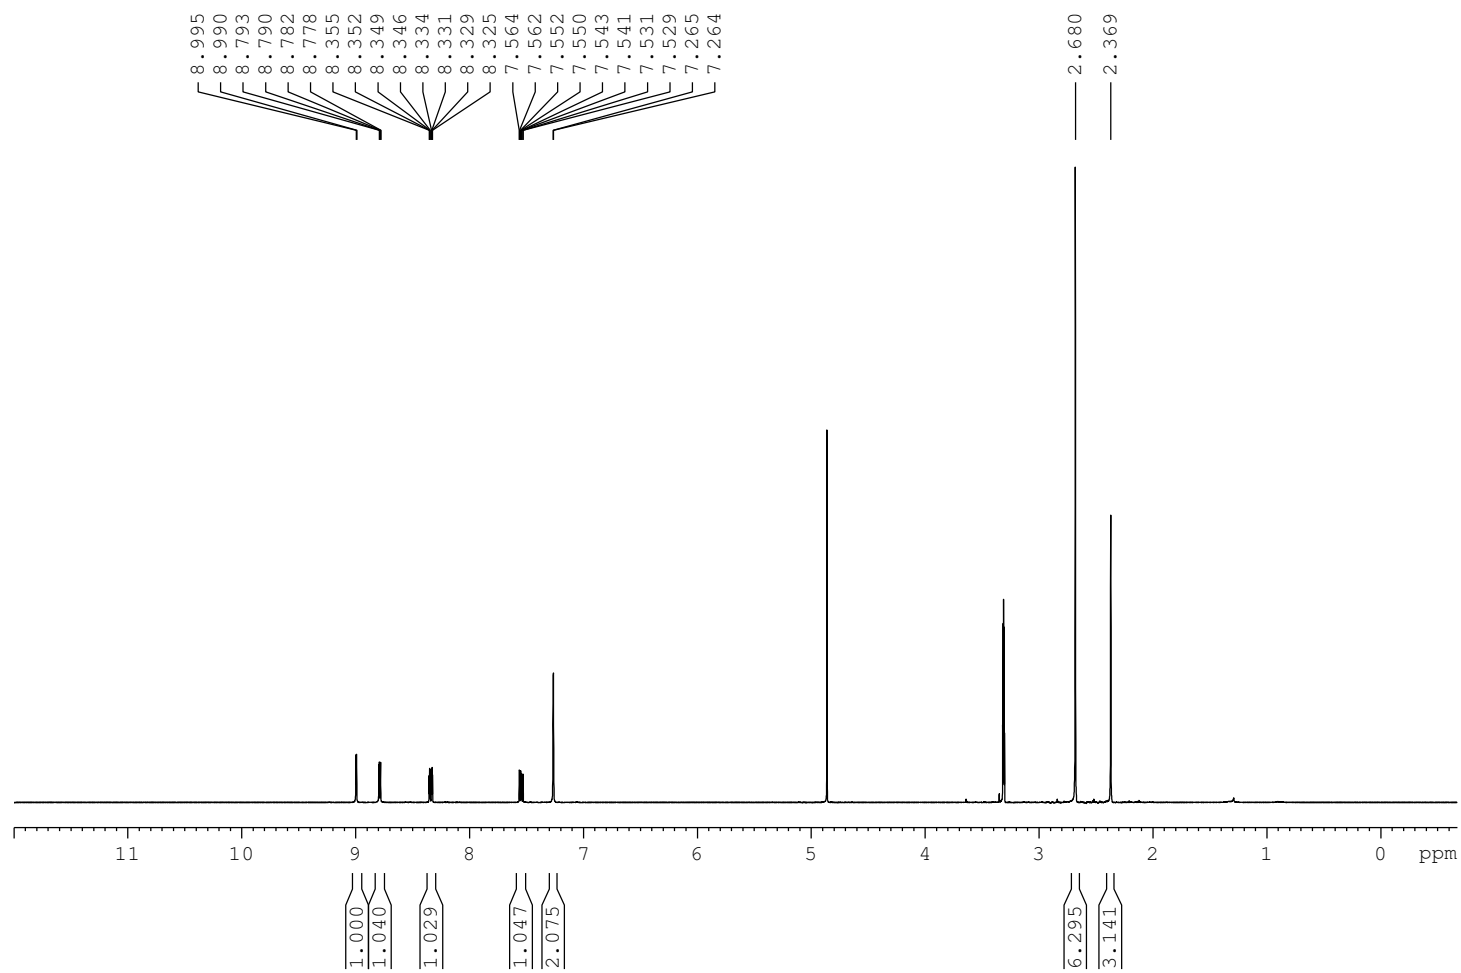

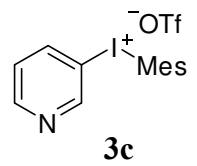

100 MHz  
MeOD

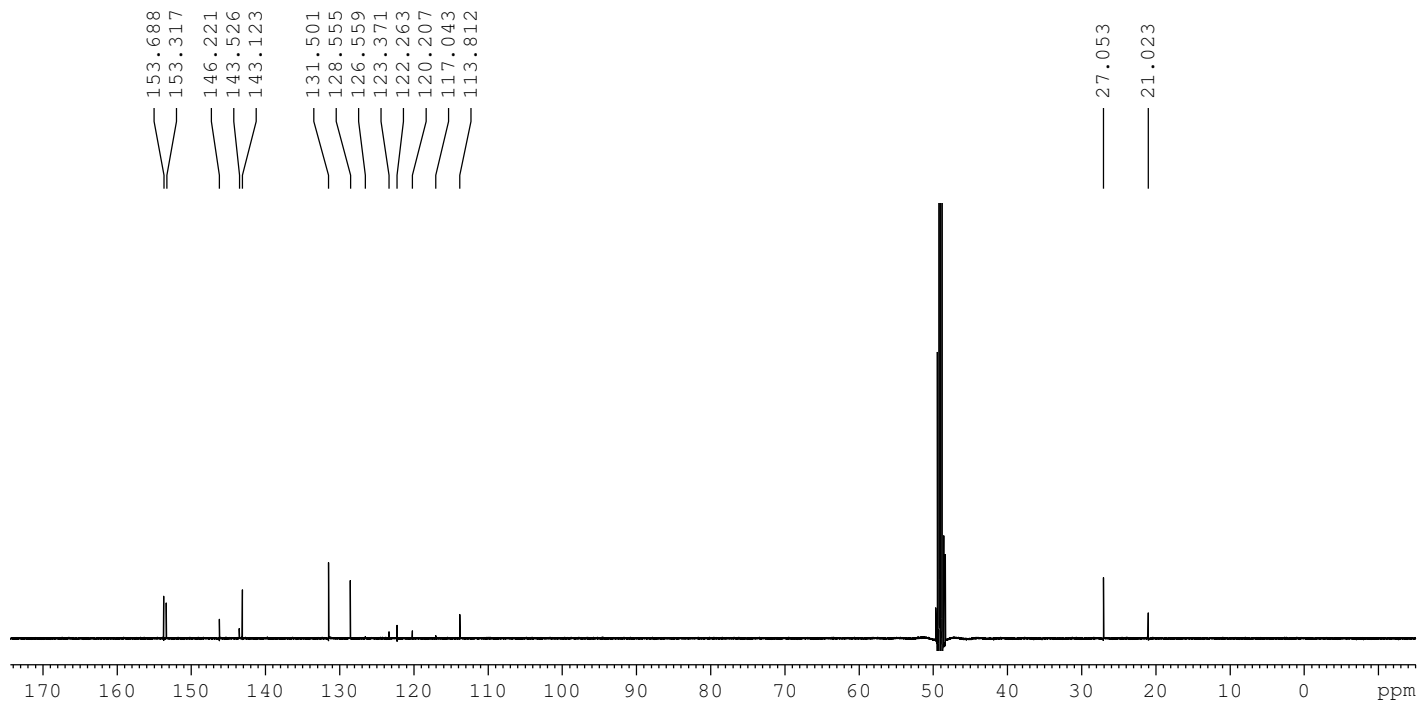

400 MHz  
MeOD

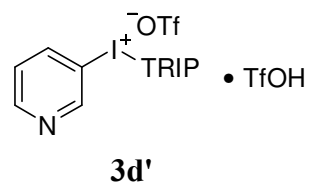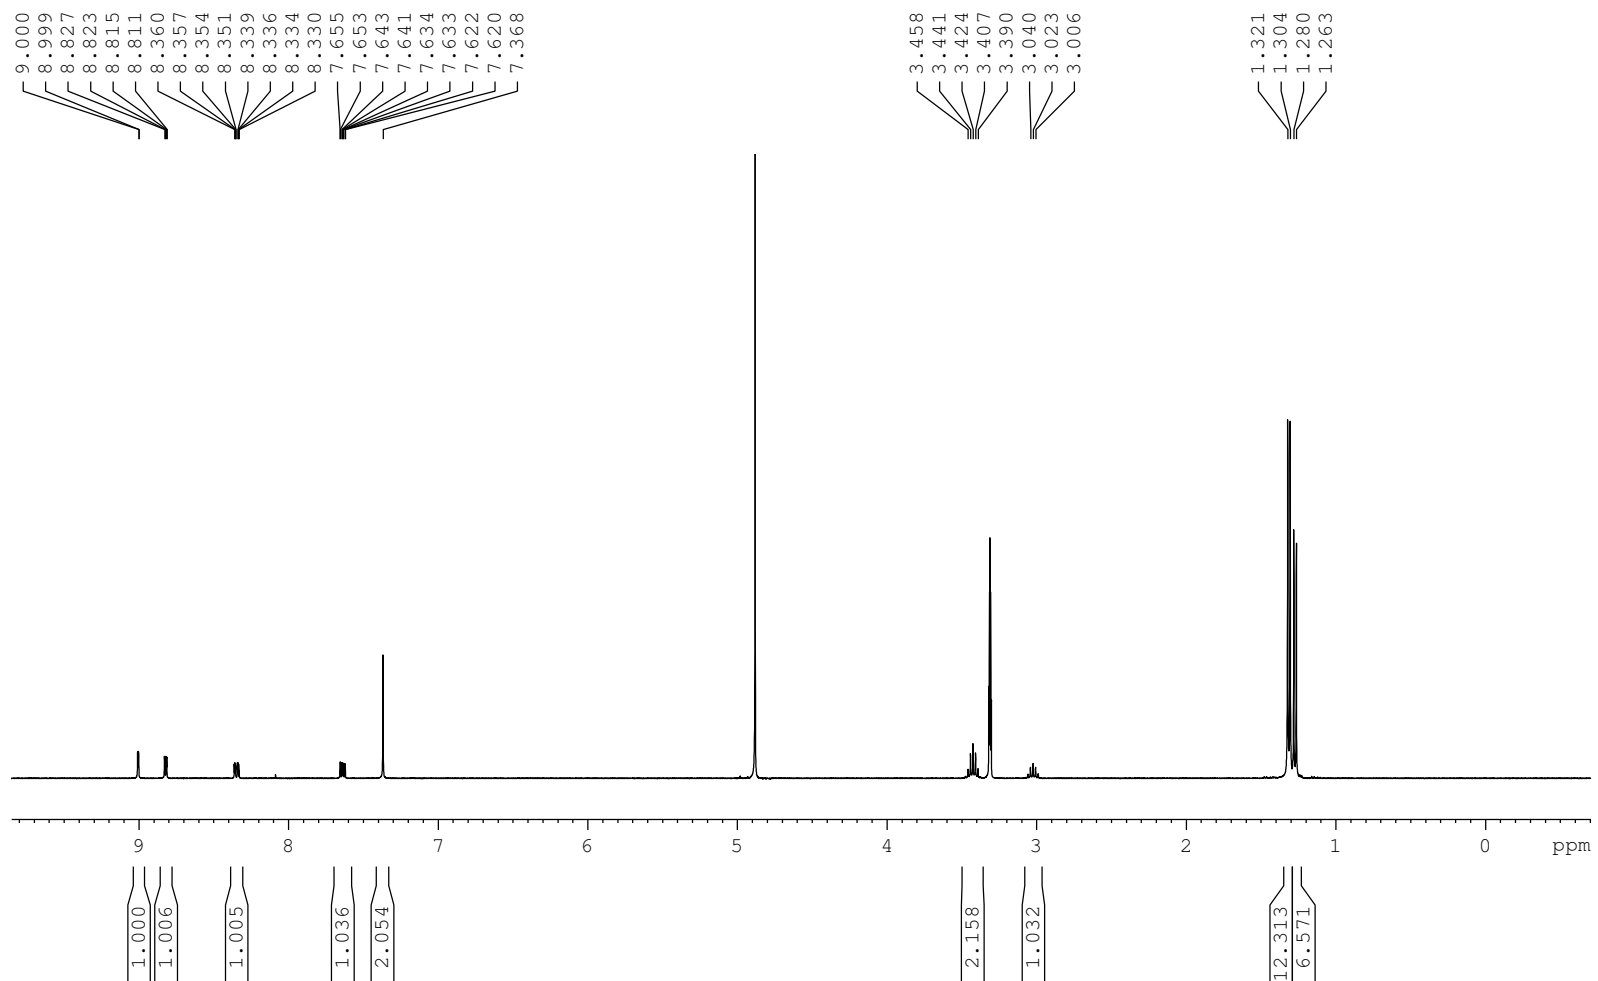



100 MHz  
MeOD

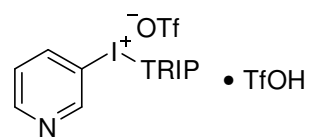

3d'

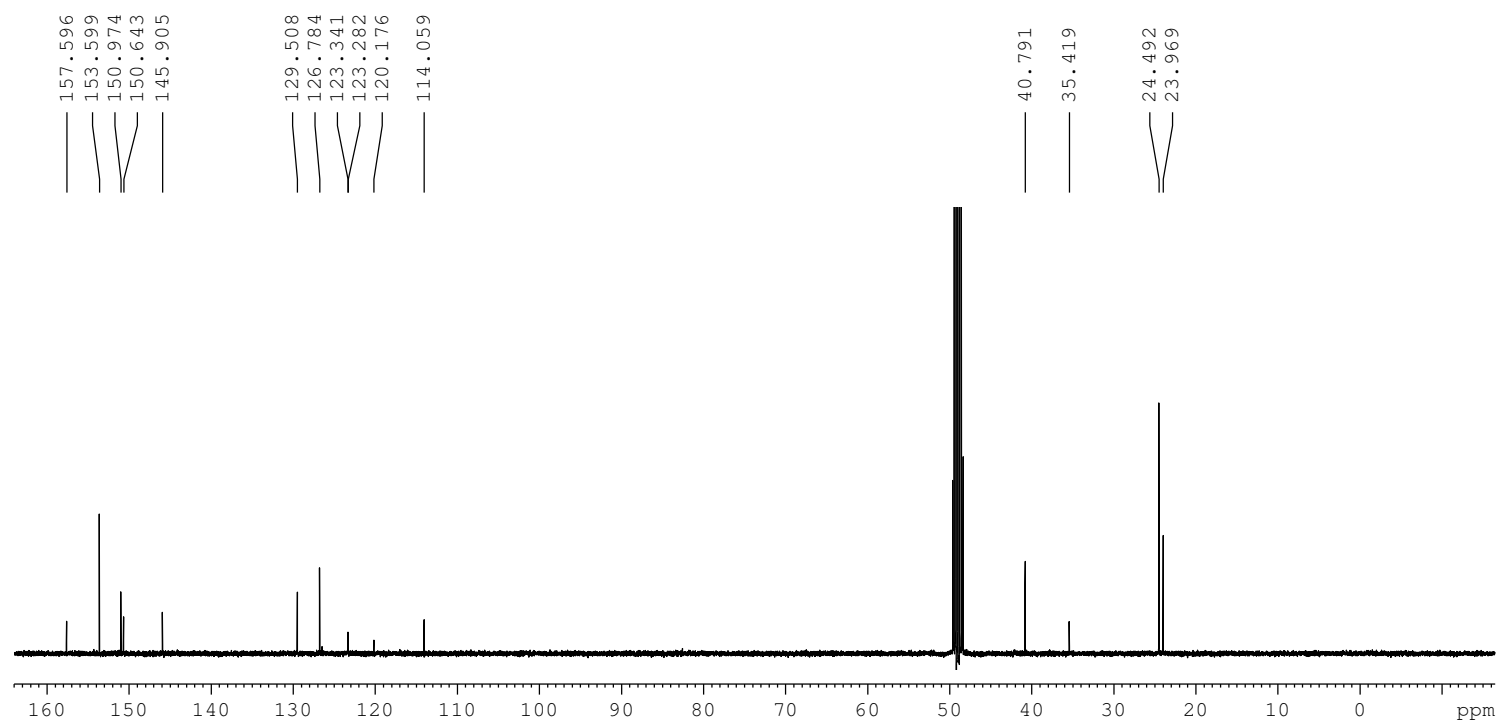

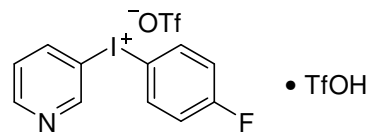

400 MHz  
MeOD

3e'

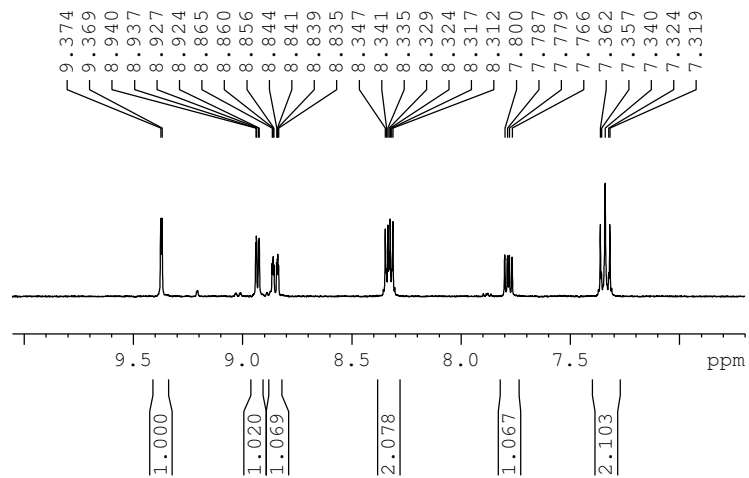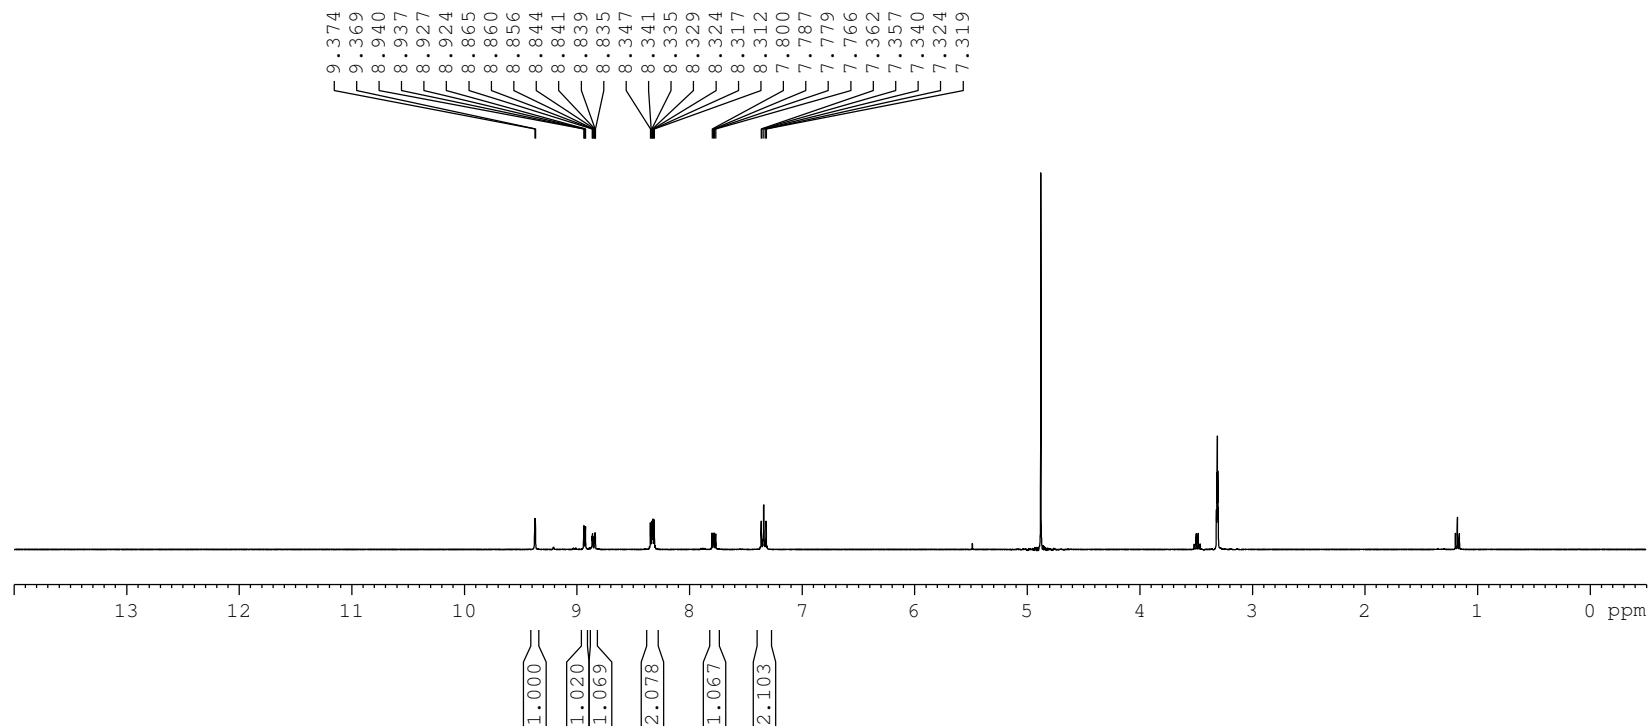

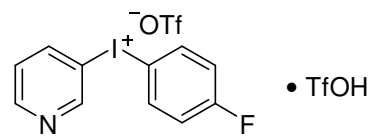

3e'

125 MHz  
MeOD

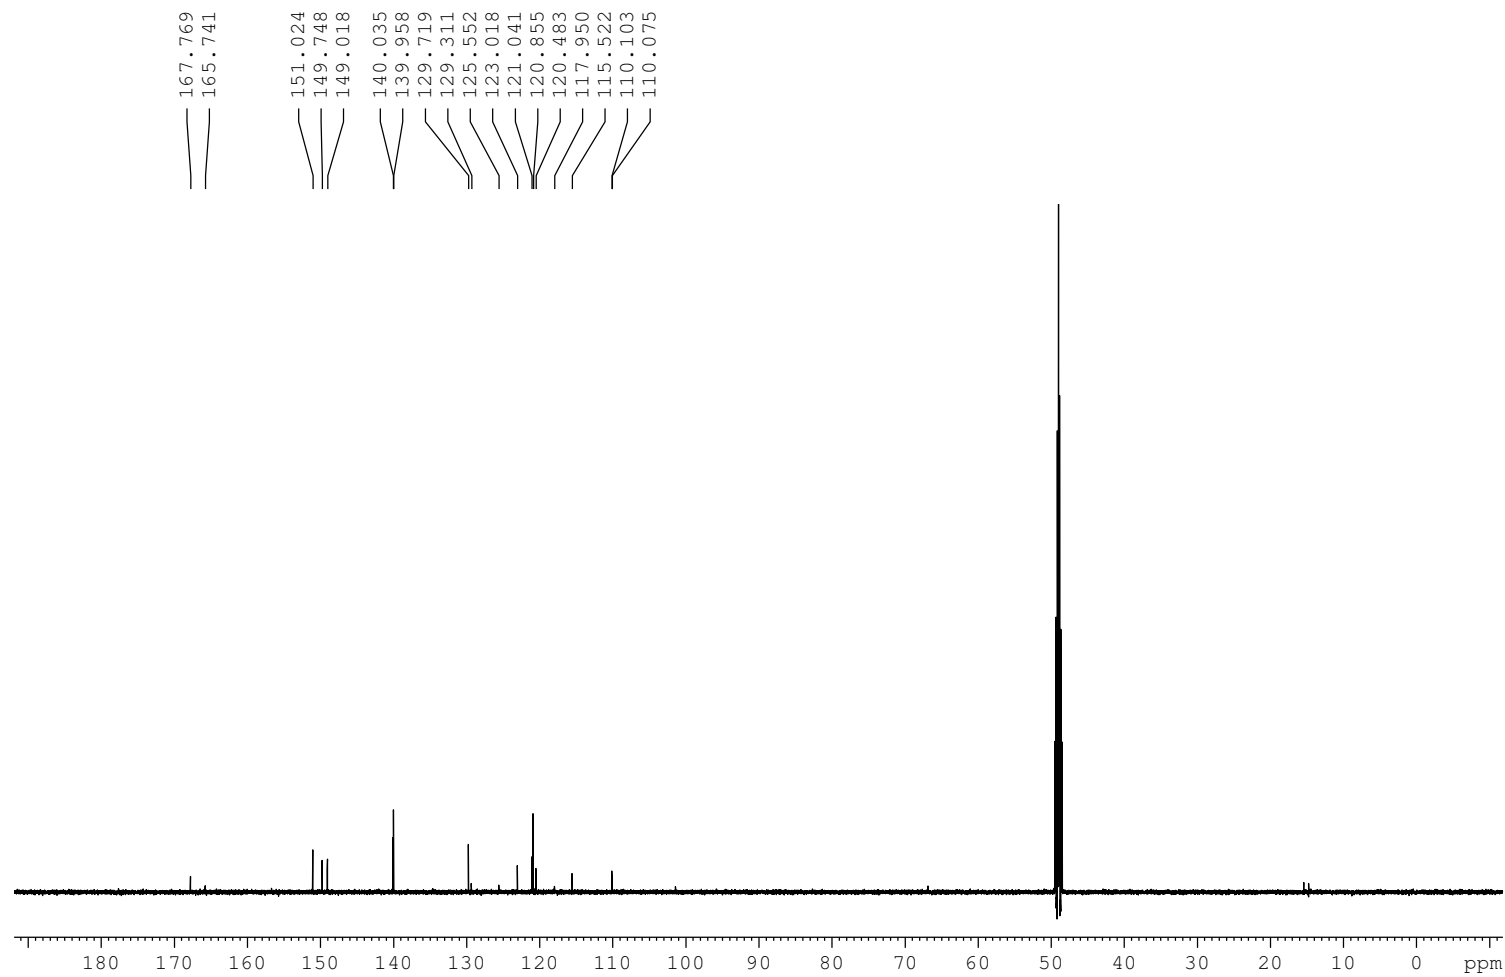

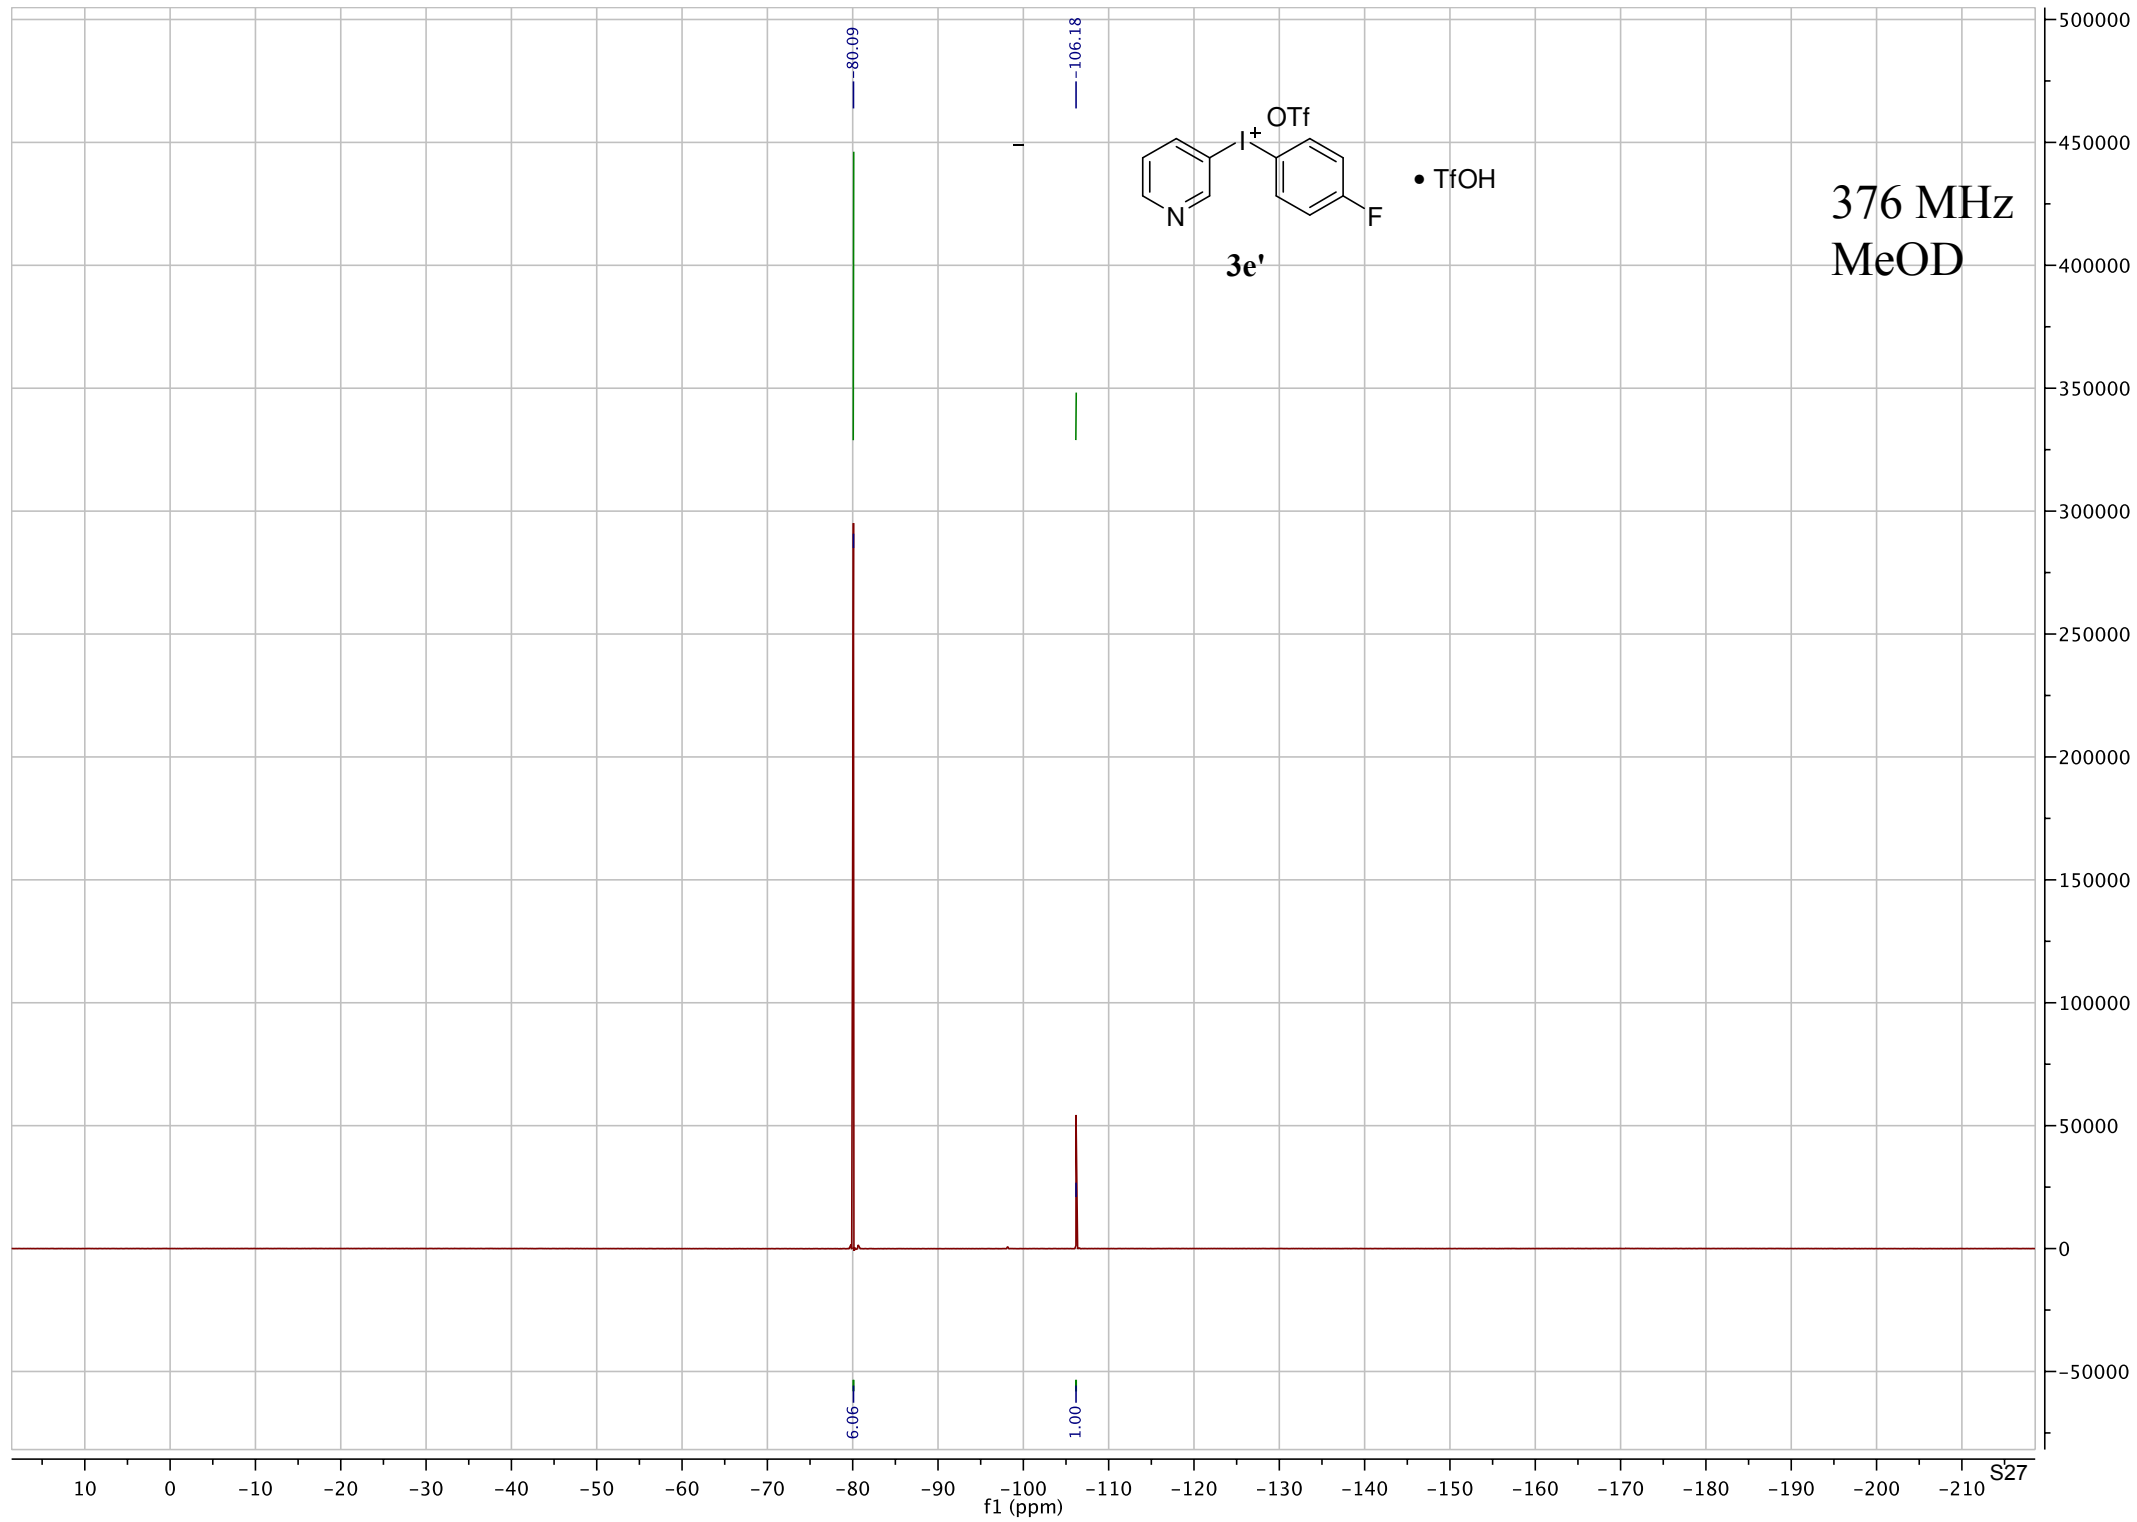

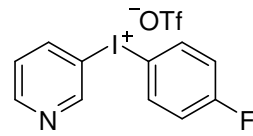

3e

400 MHz  
MeOD

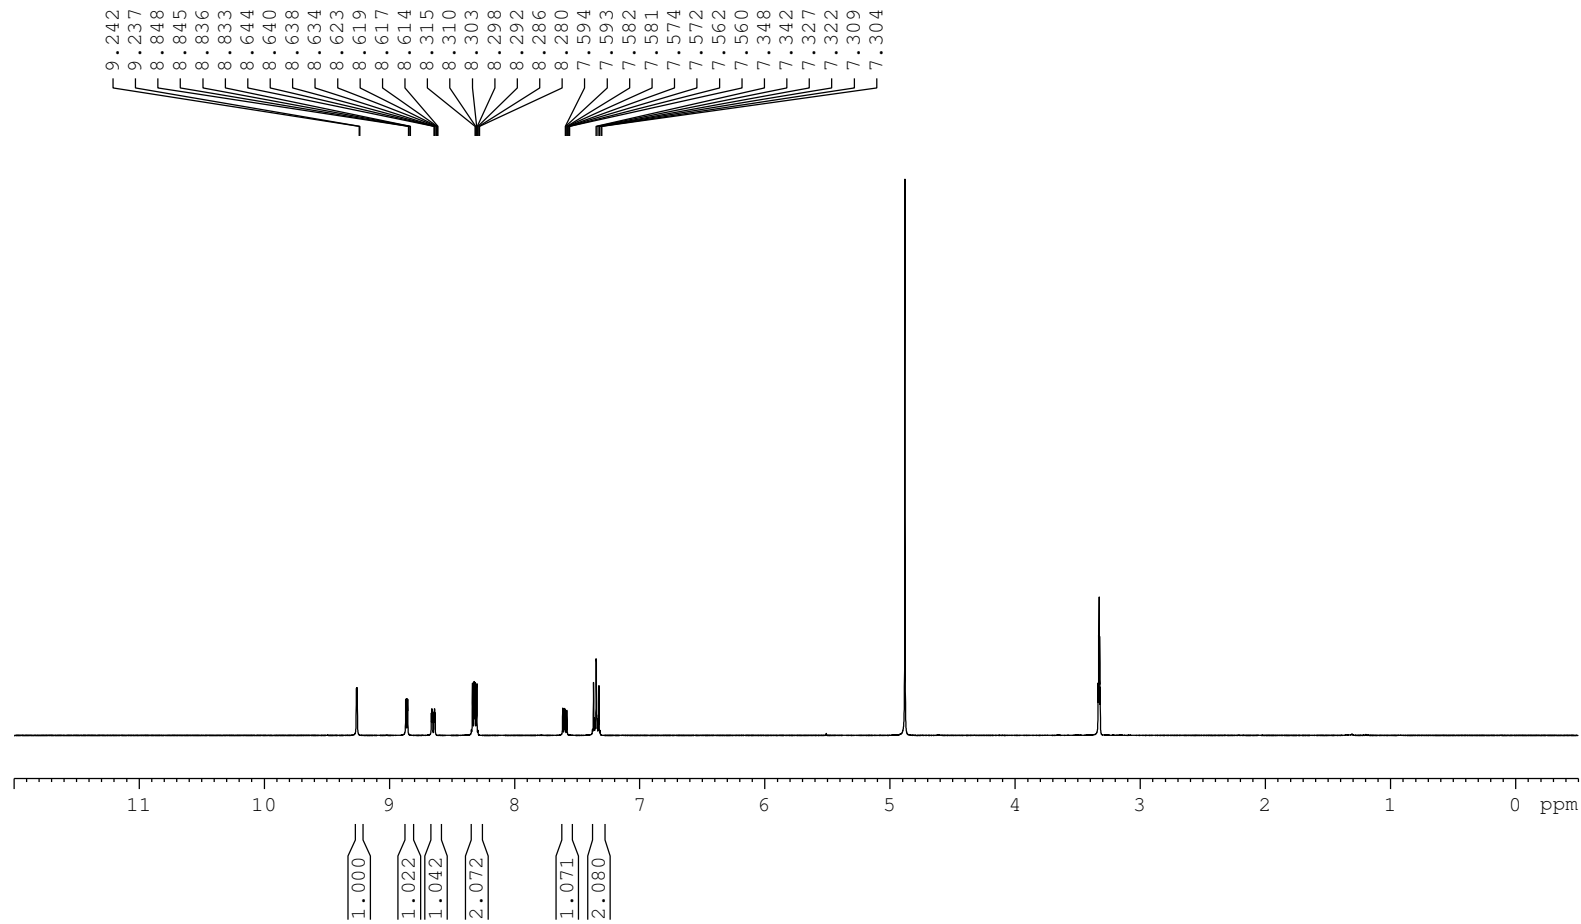

100 MHz  
MeOD

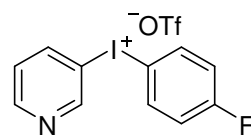

**3e**

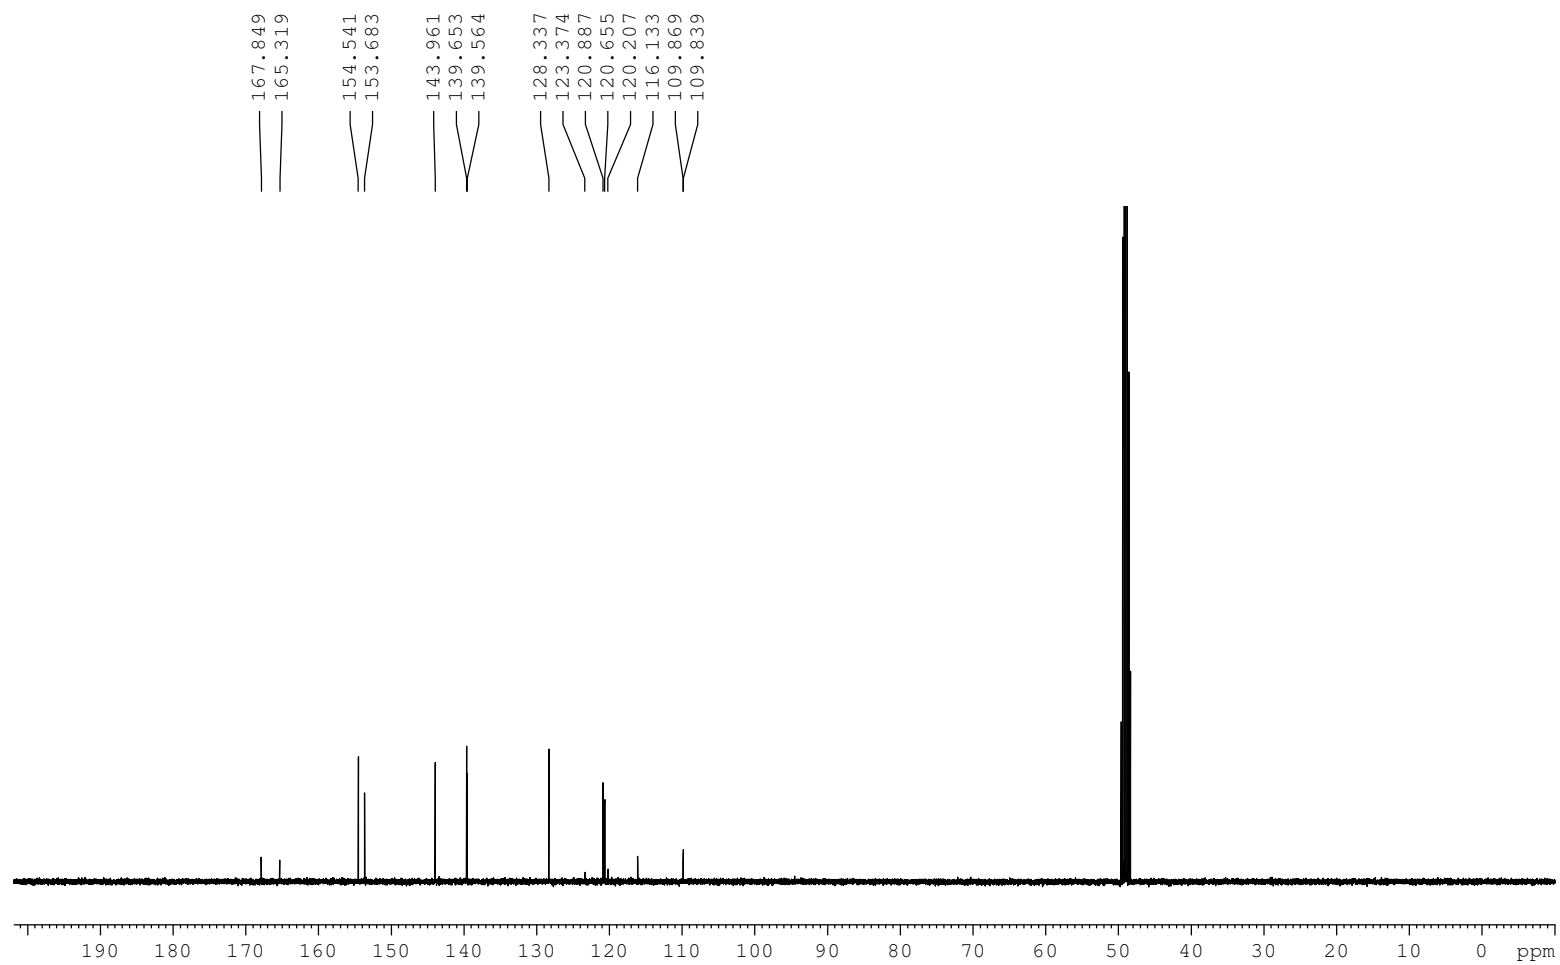

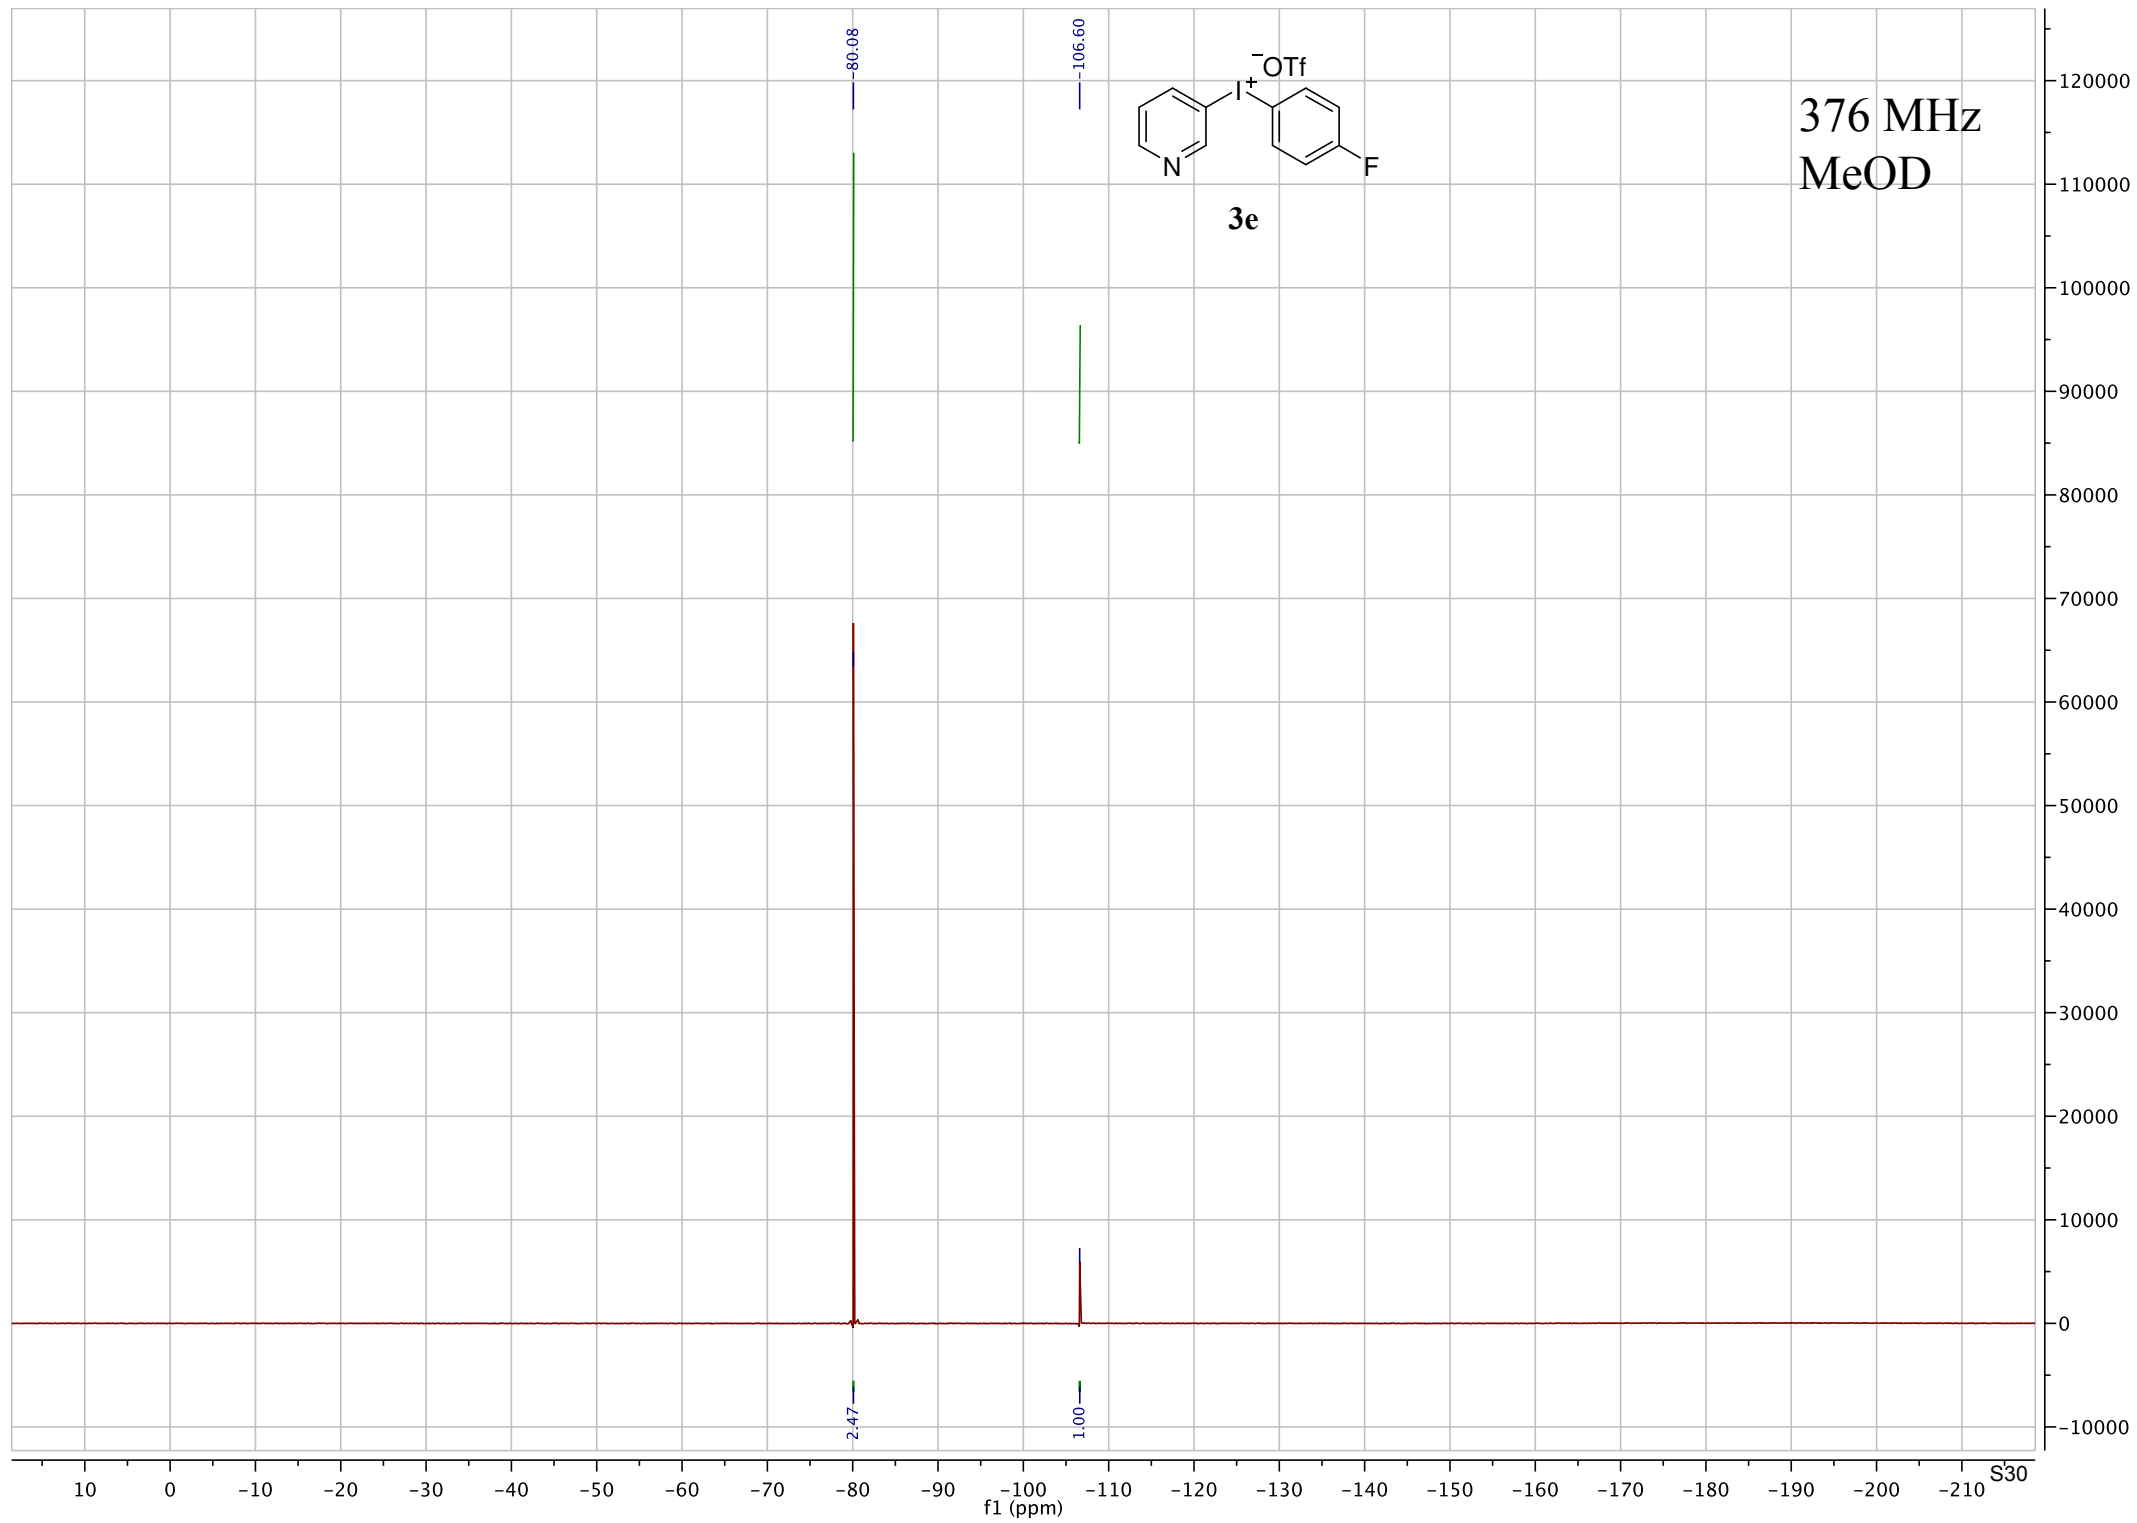

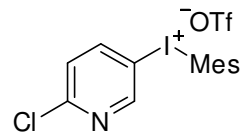

**3f**

400 MHz  
MeOD

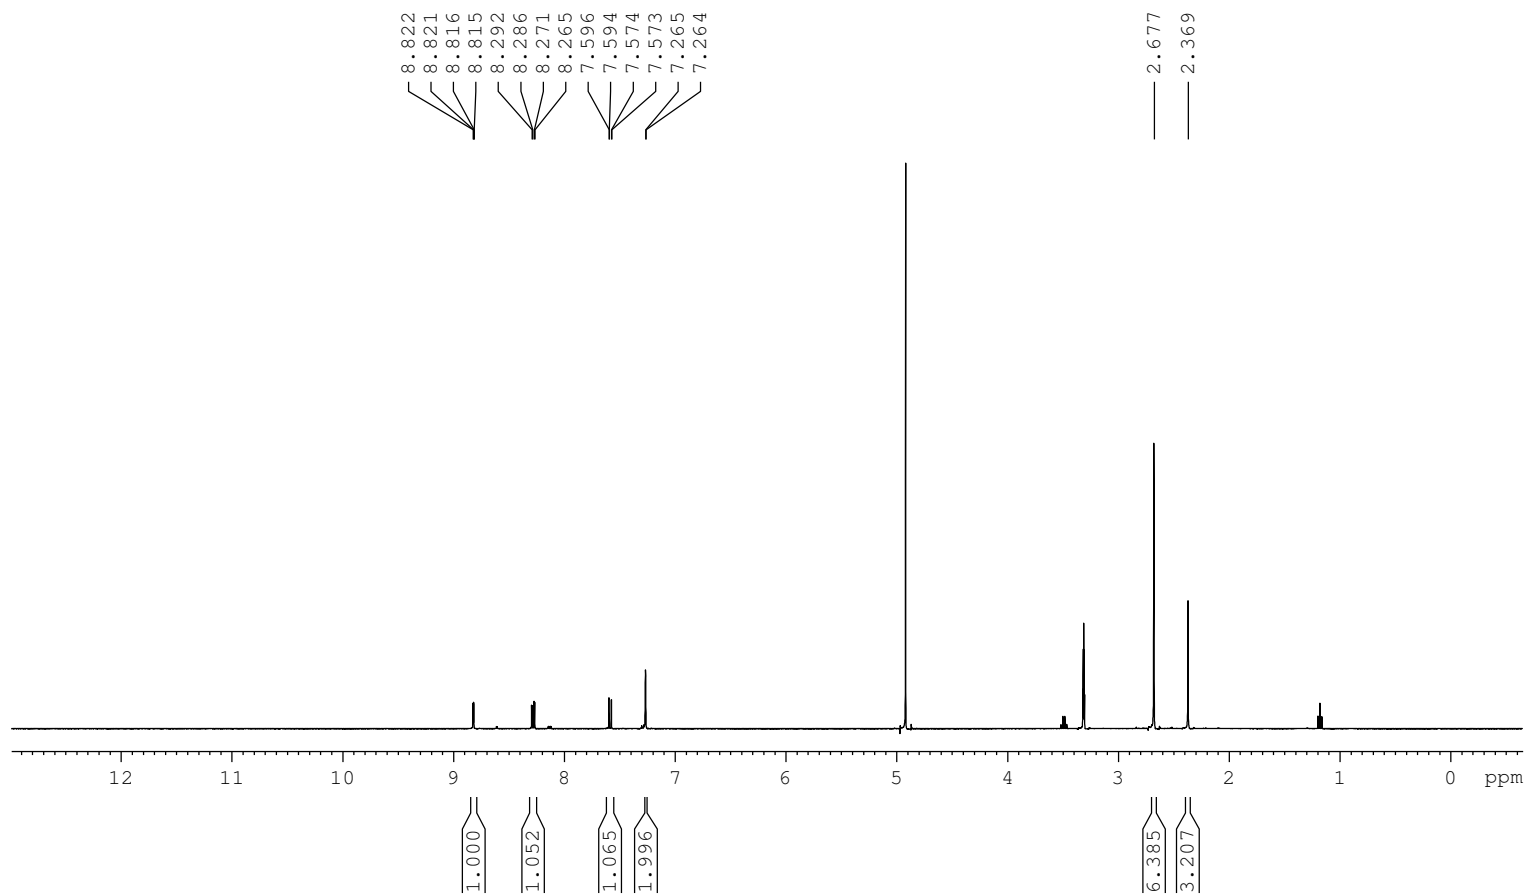



125 MHz  
MeOD

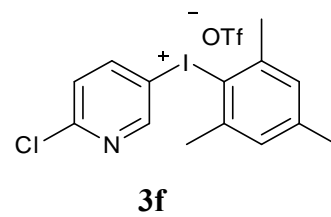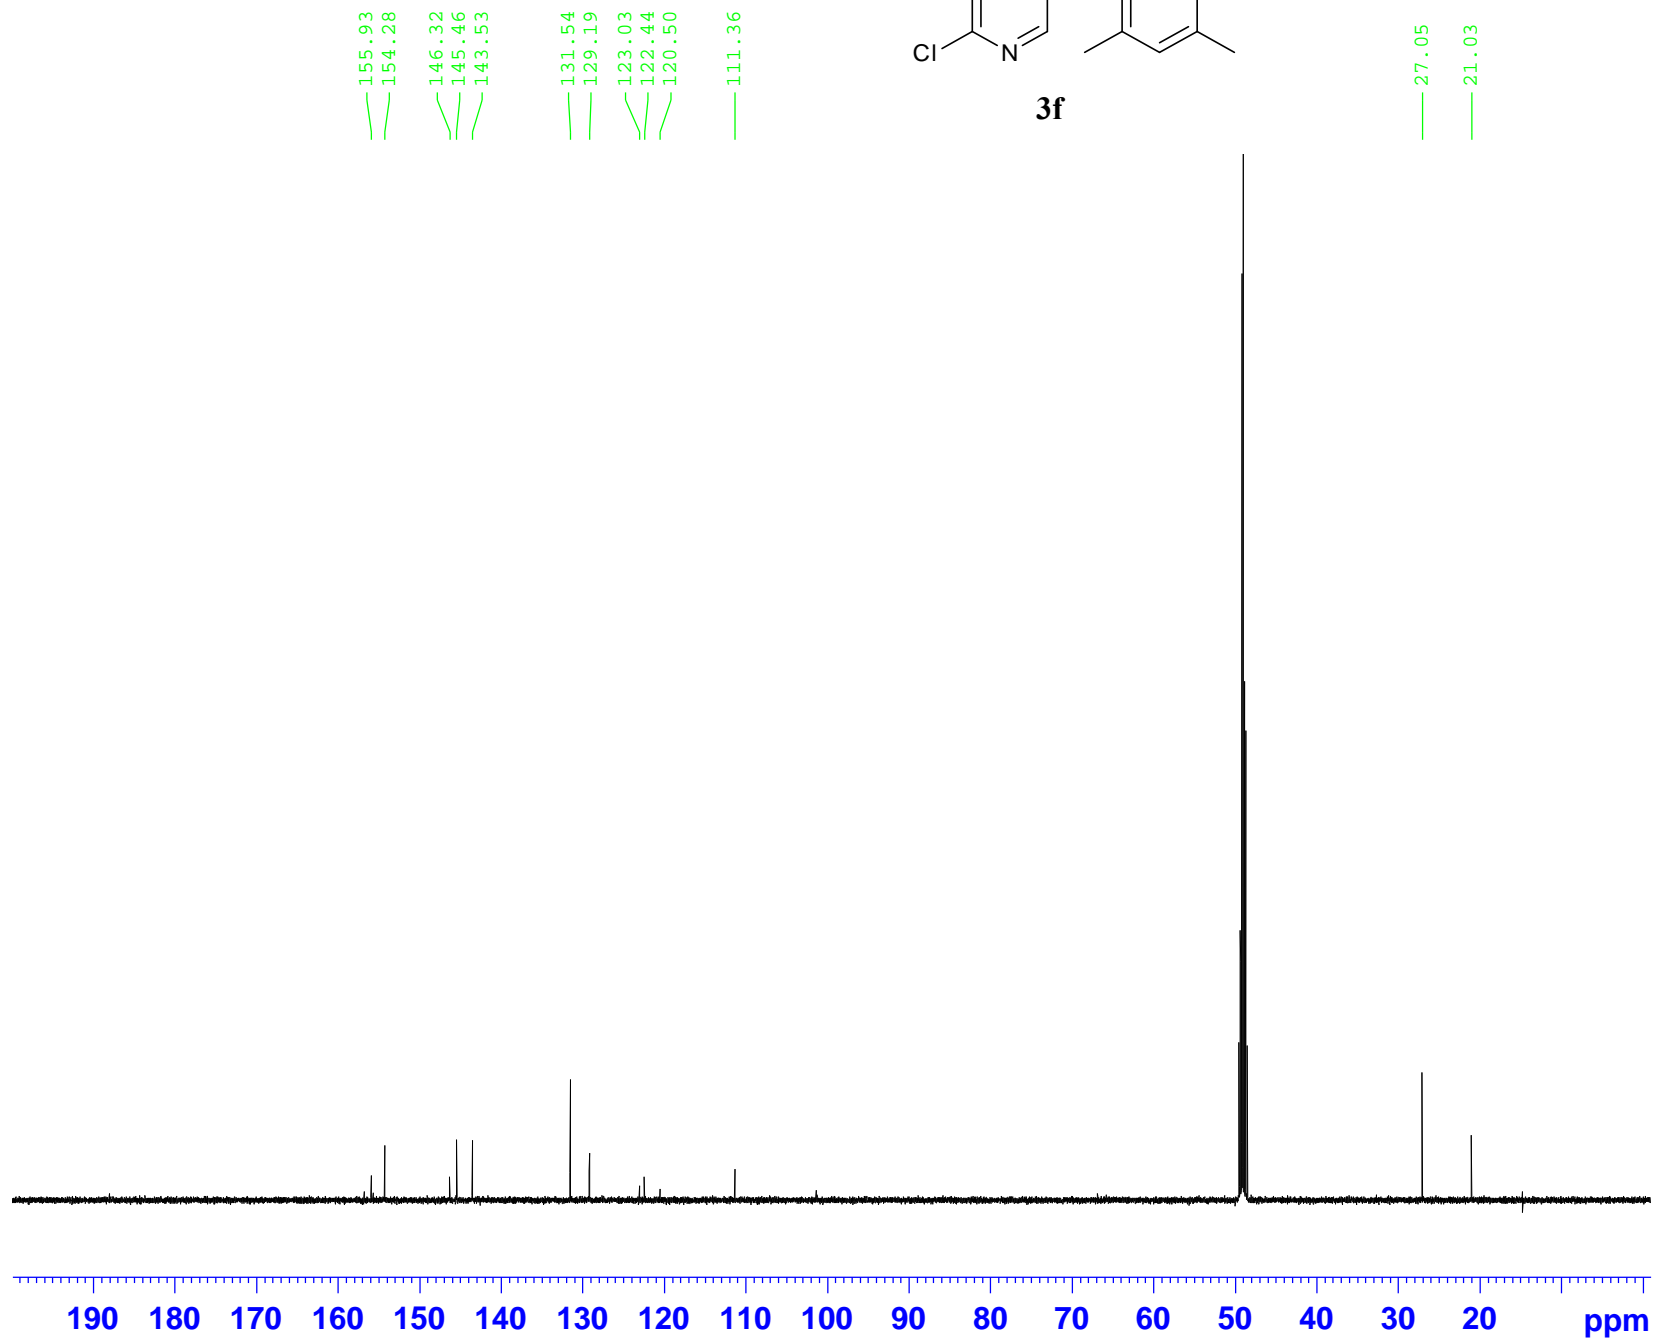

400 MHz  
MeOD

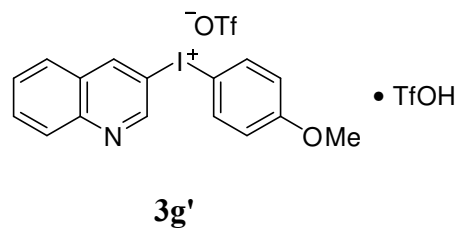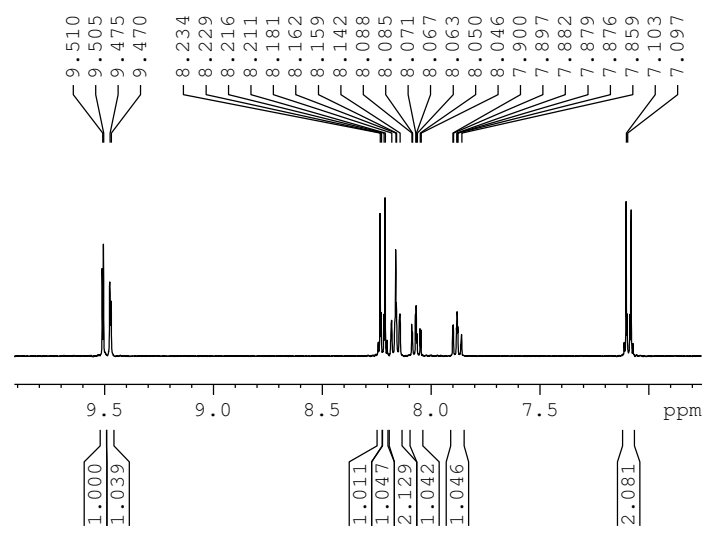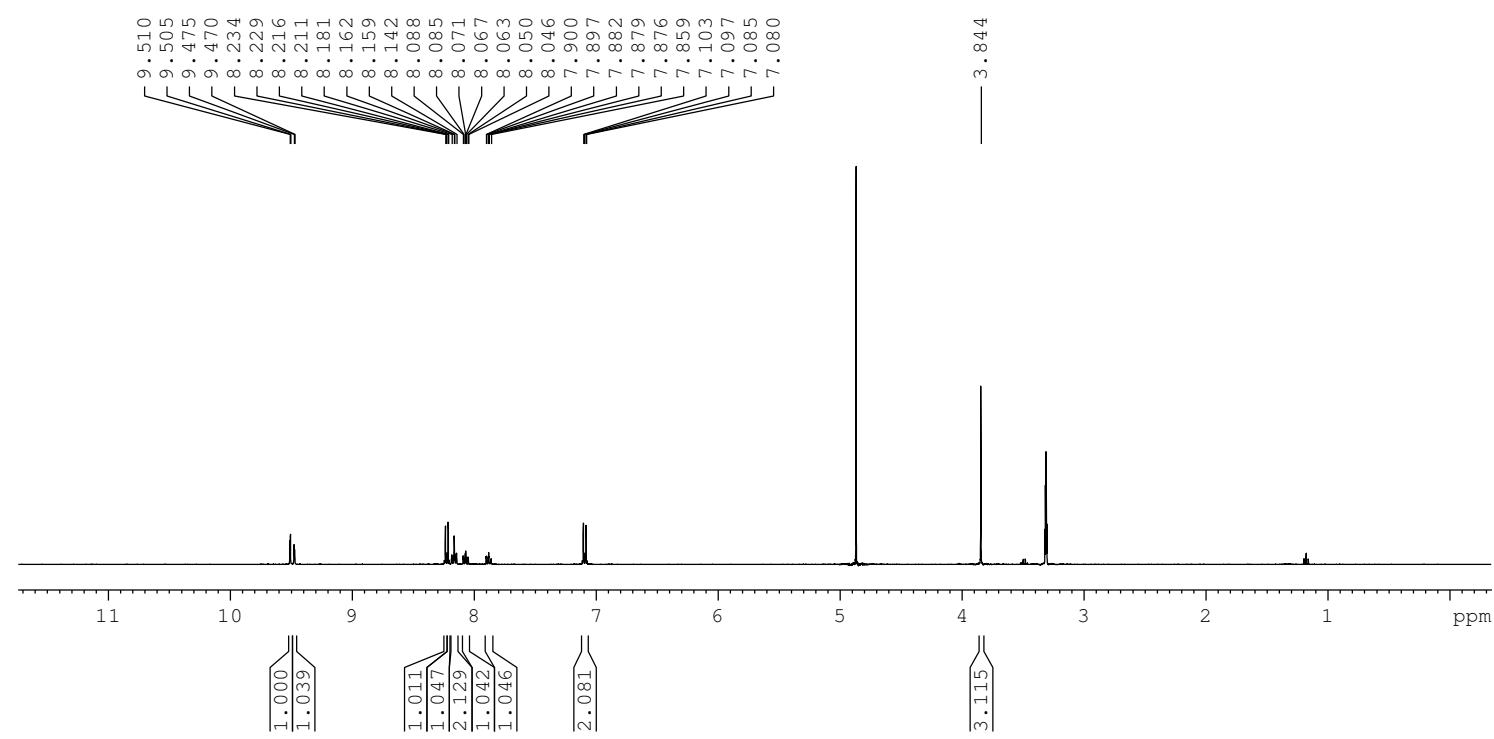

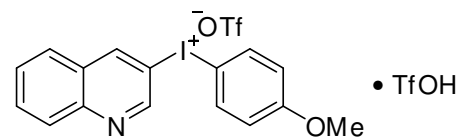

**3g'**

125 MHz  
MeOD

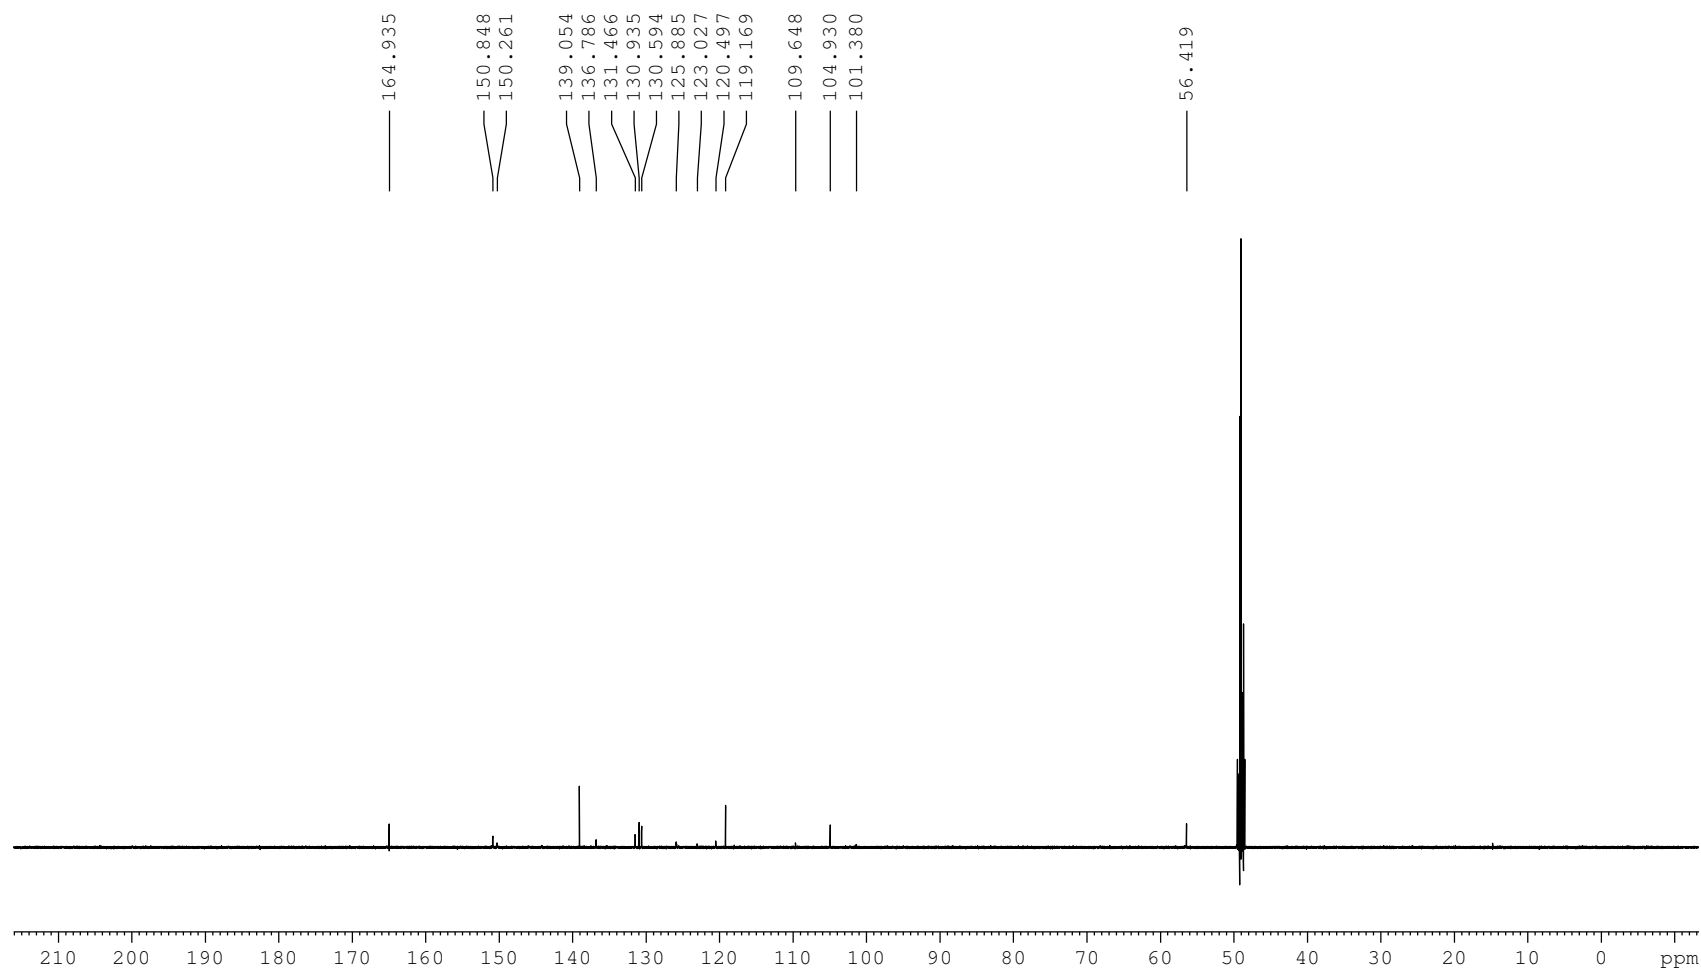

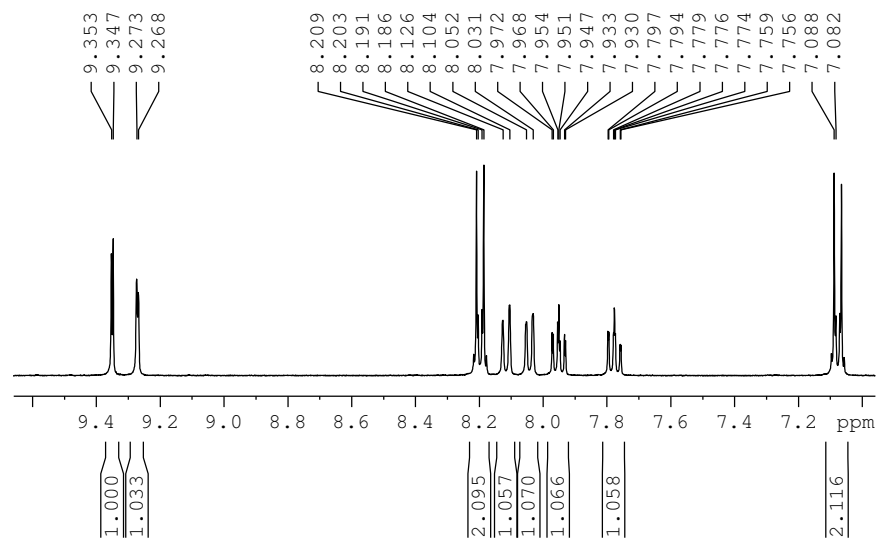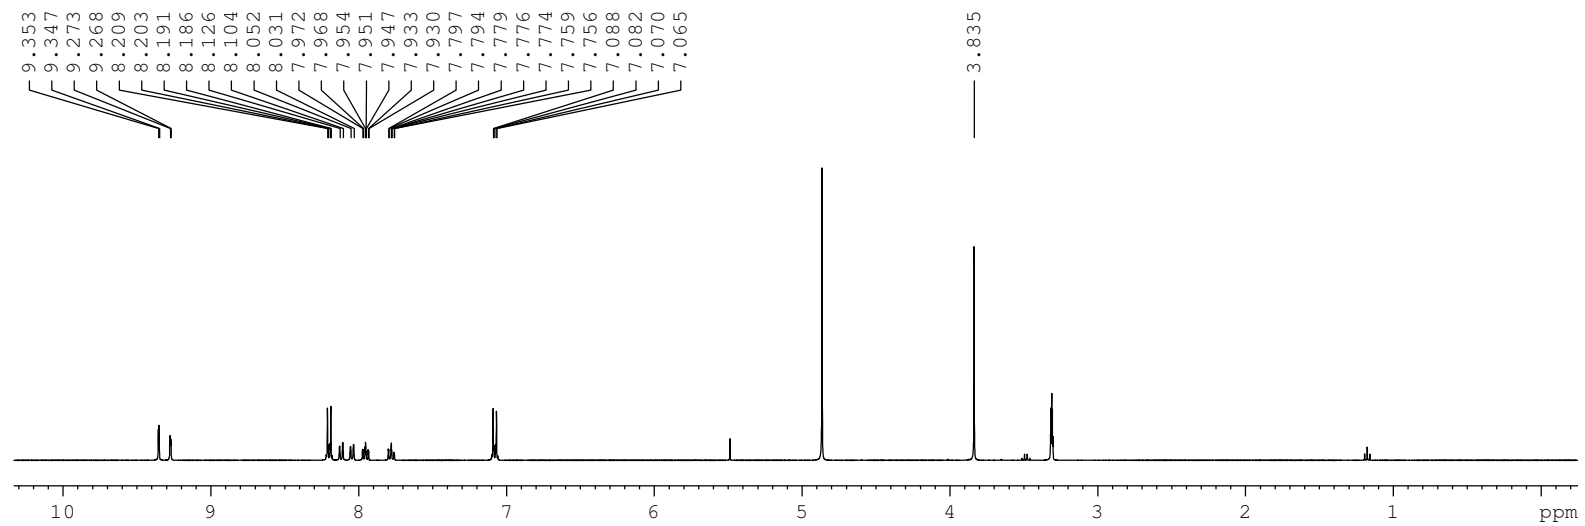

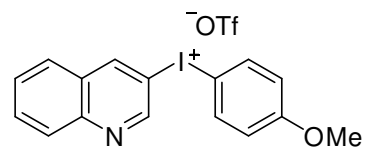

**3g**

100 MHz  
MeOD

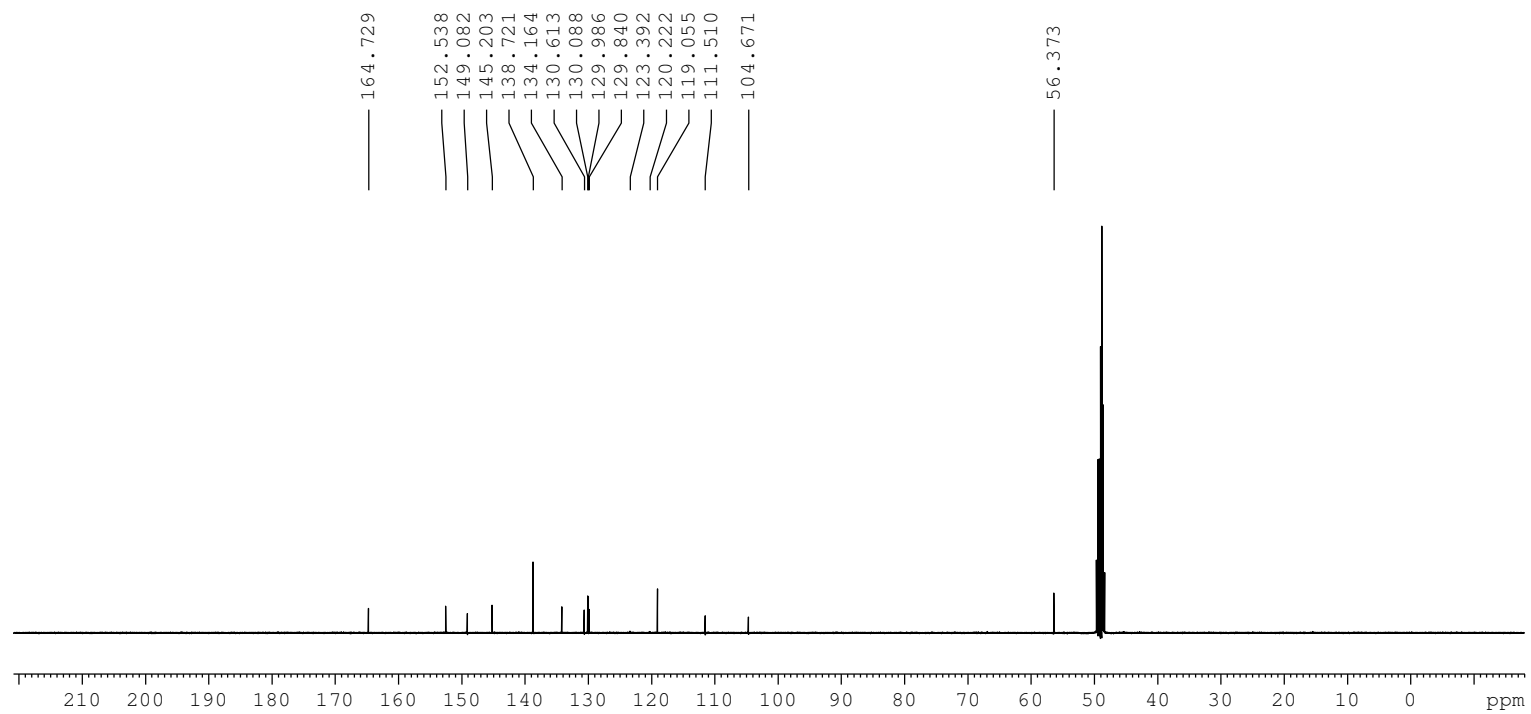

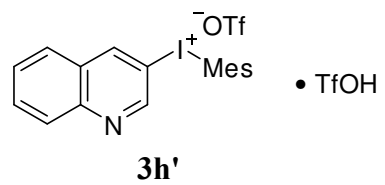

400 MHz  
MeOD

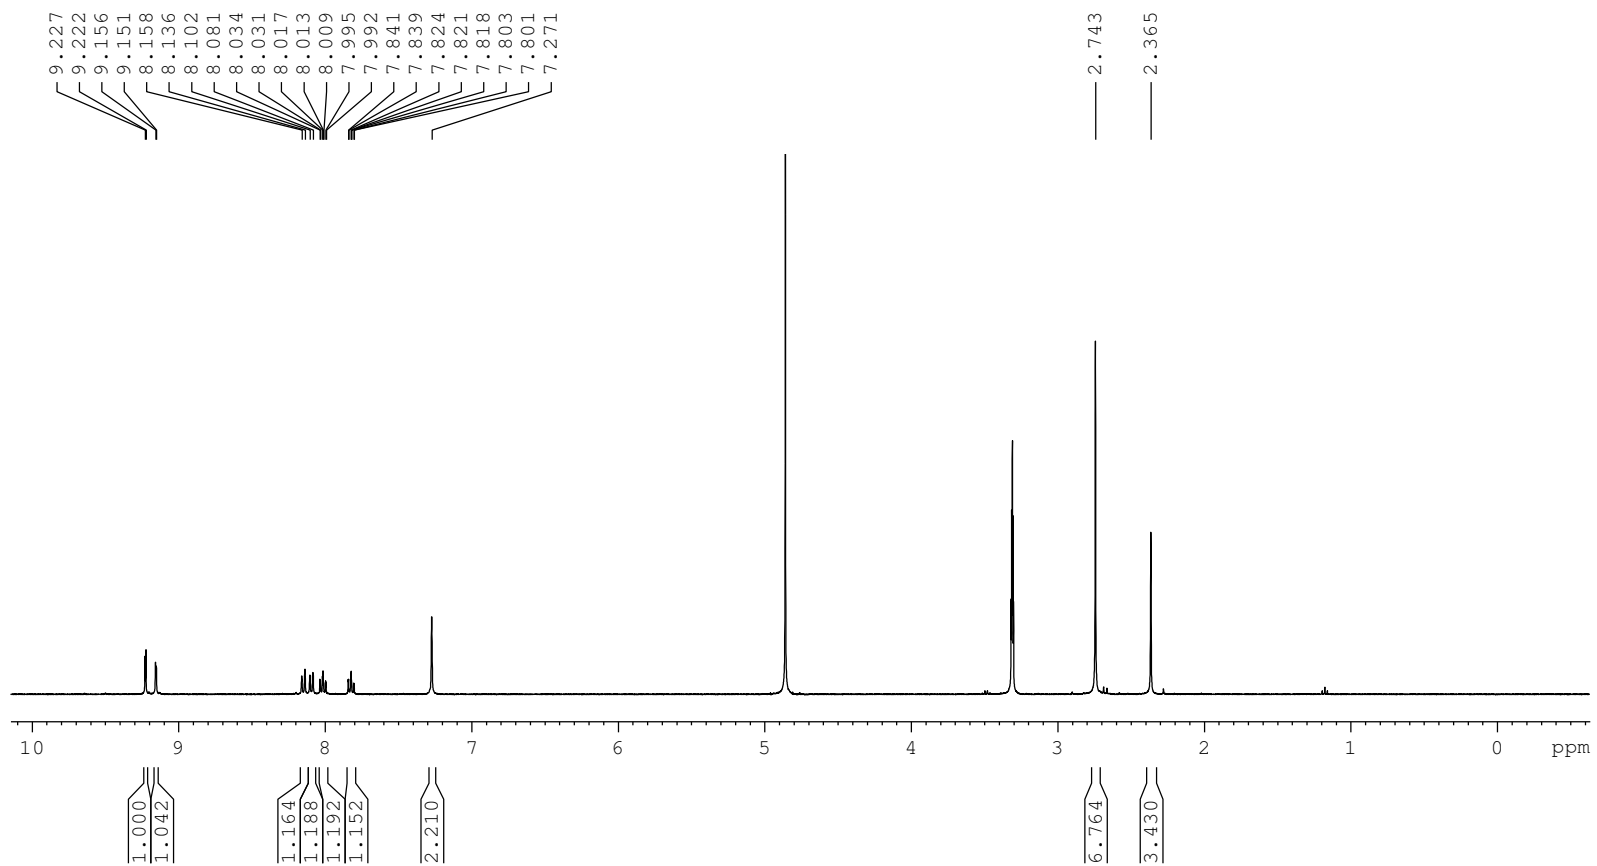

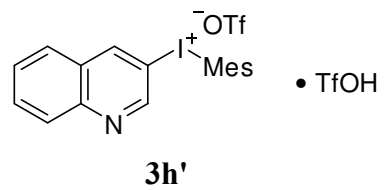

100 MHz  
MeOD

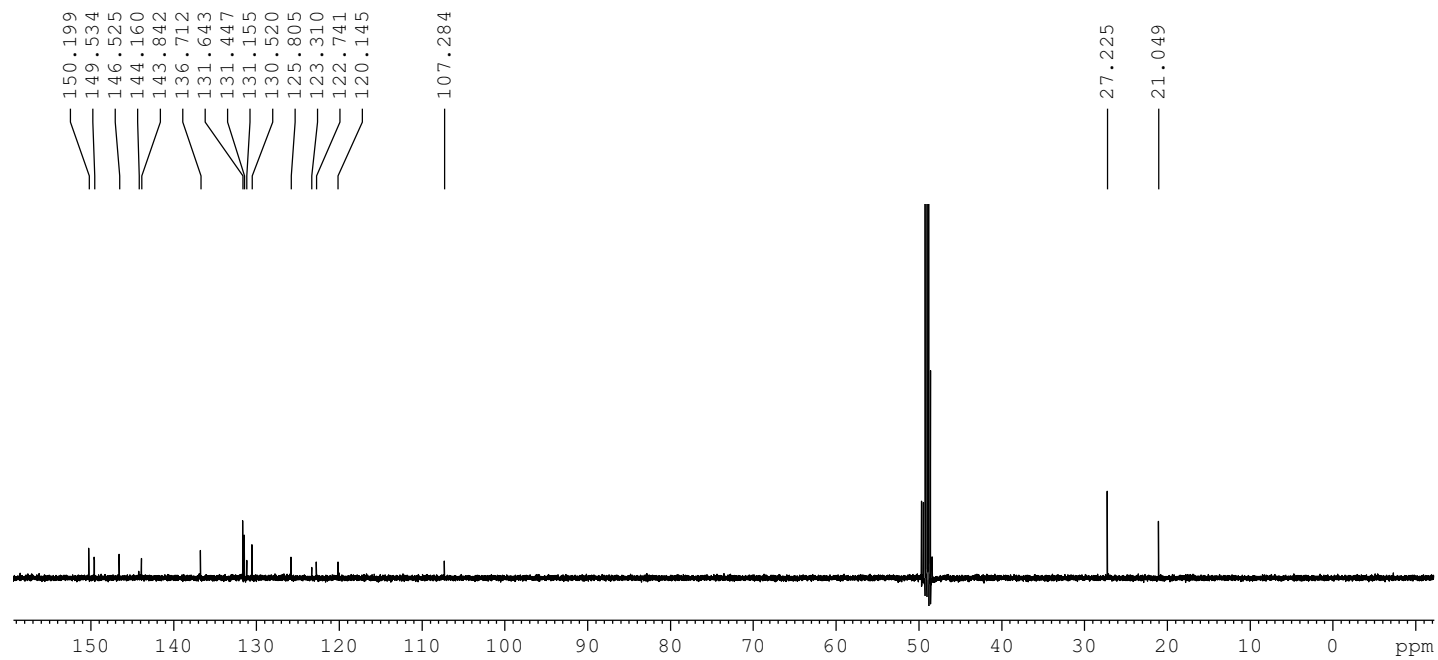

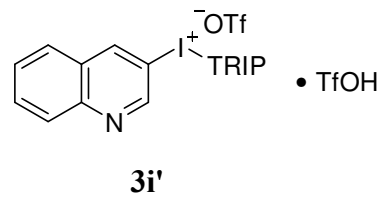

400 MHz  
MeOD

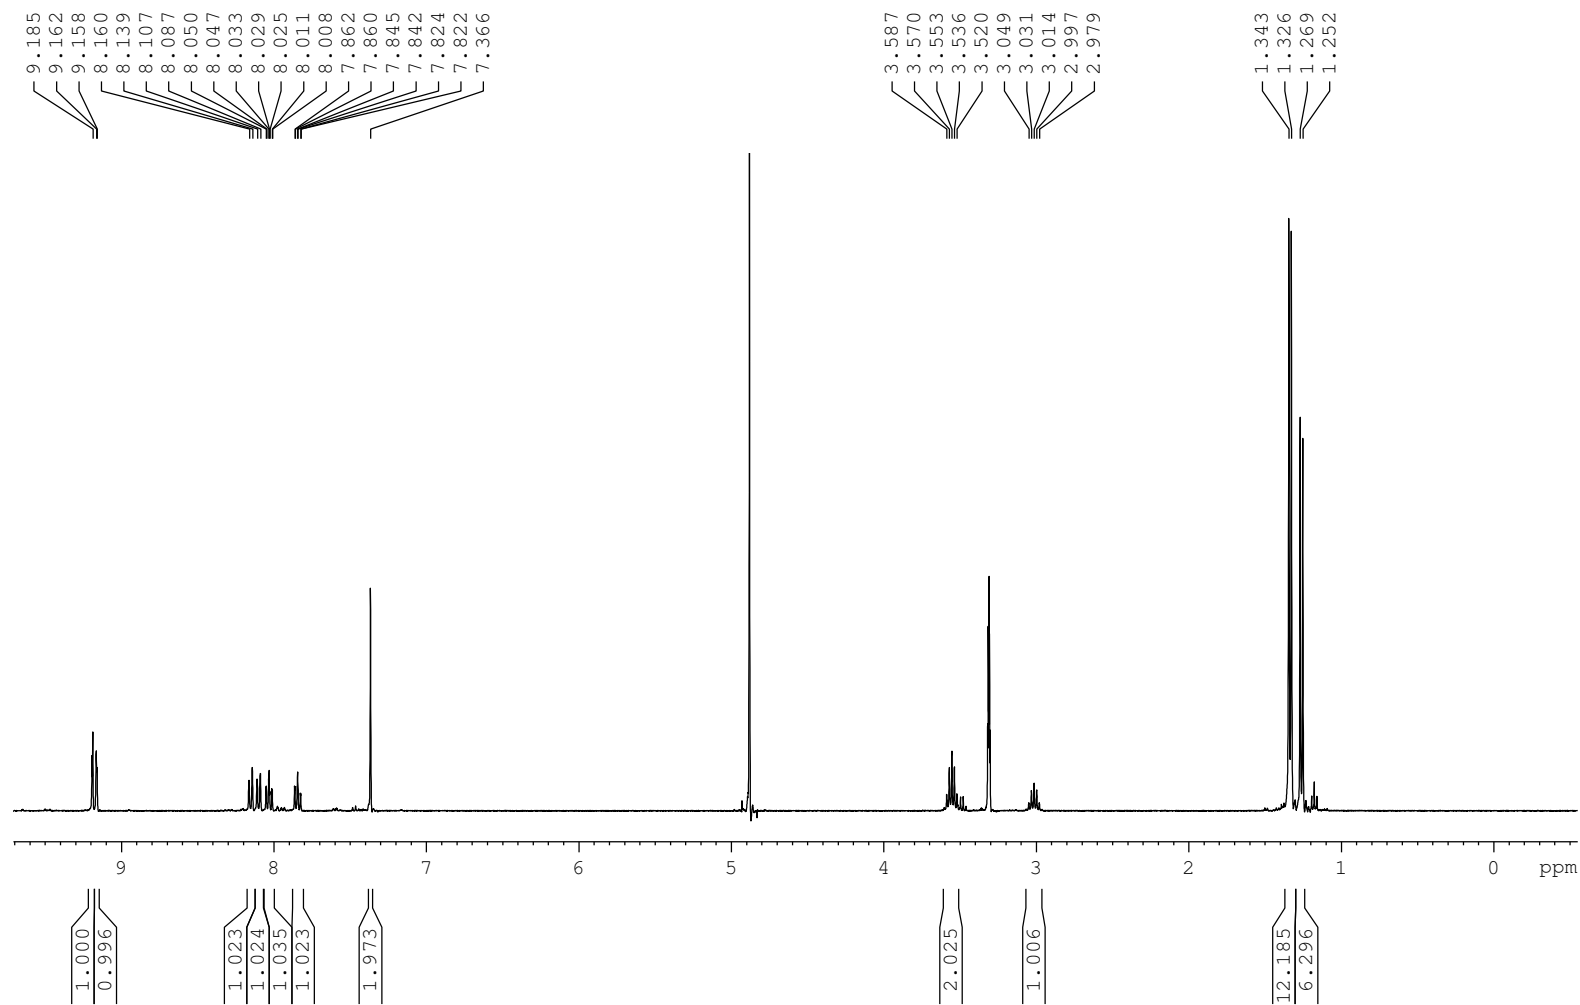



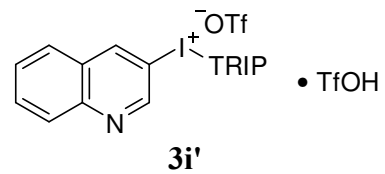

100 MHz  
MeOD

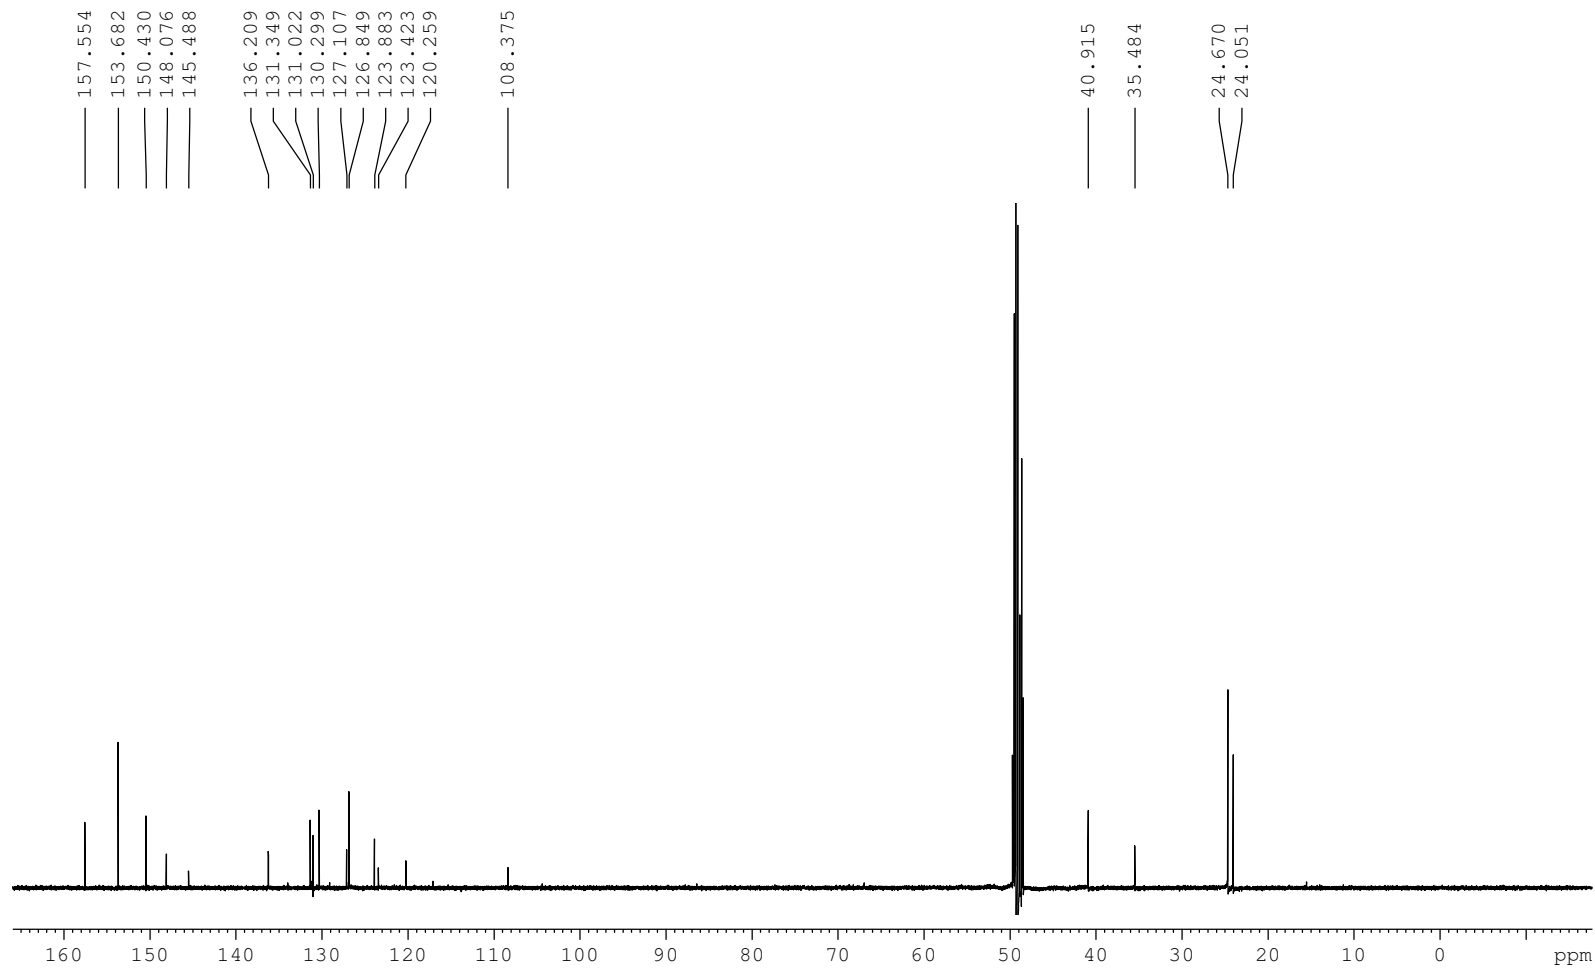

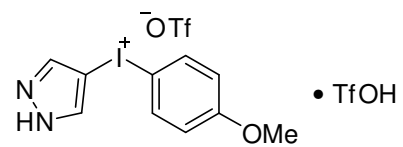

3j'

400 MHz  
MeOD

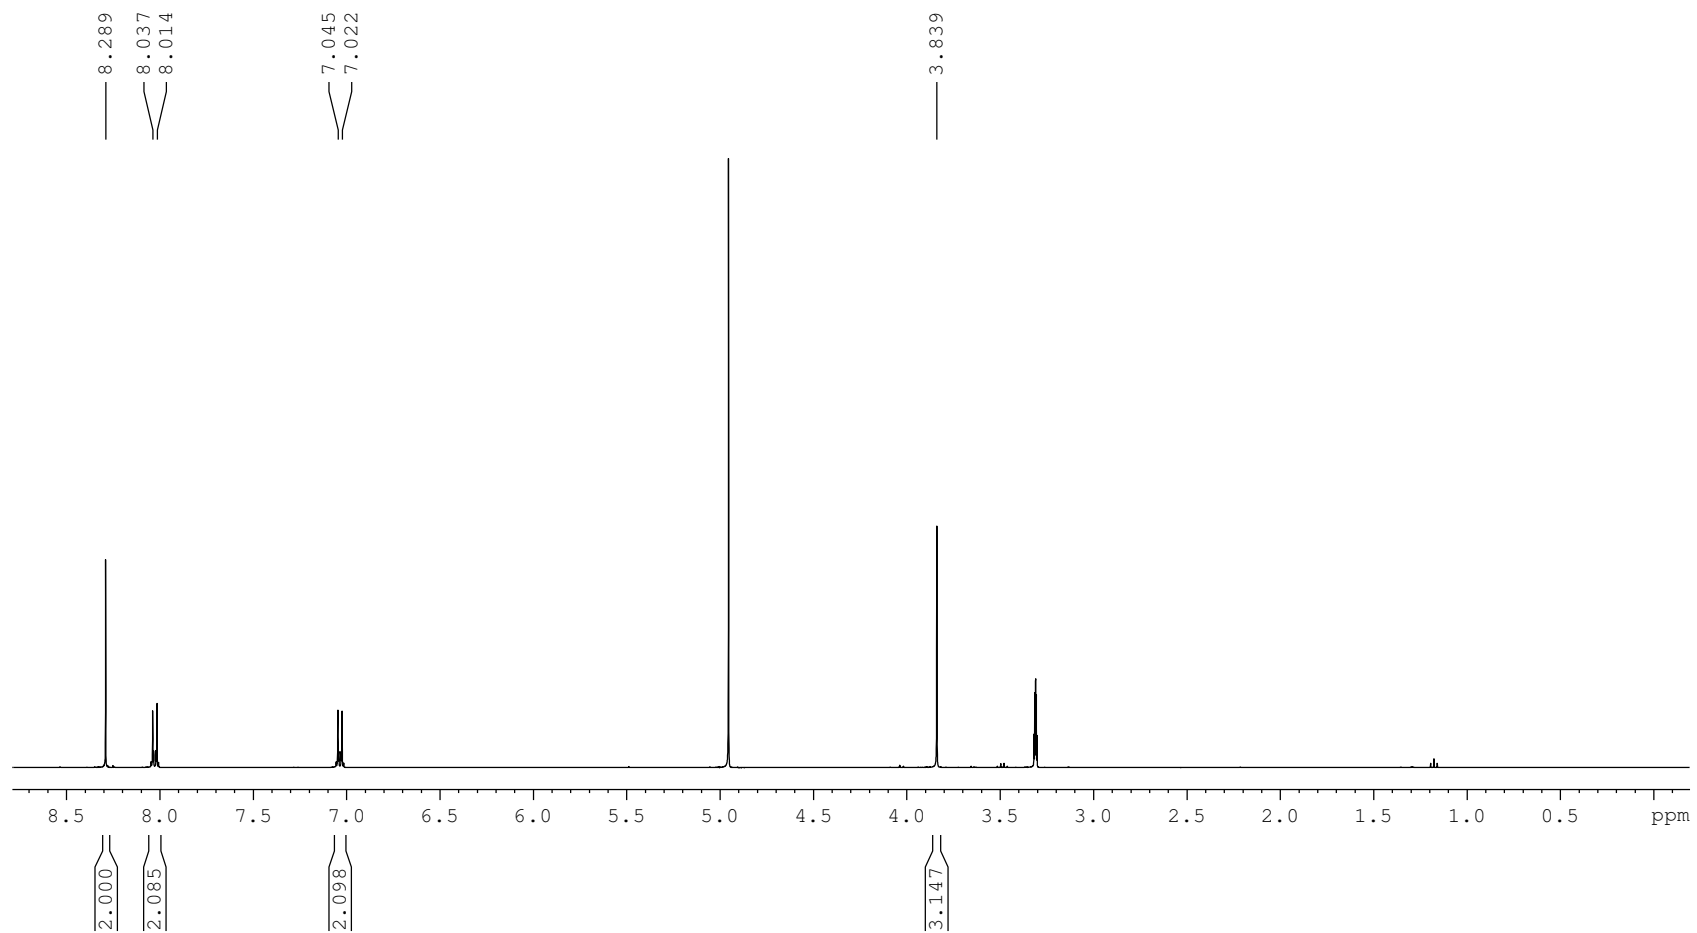

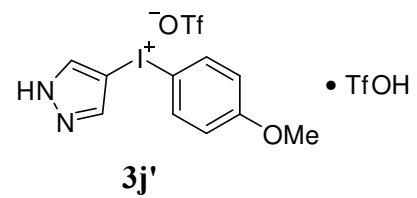

100 MHz  
MeOD

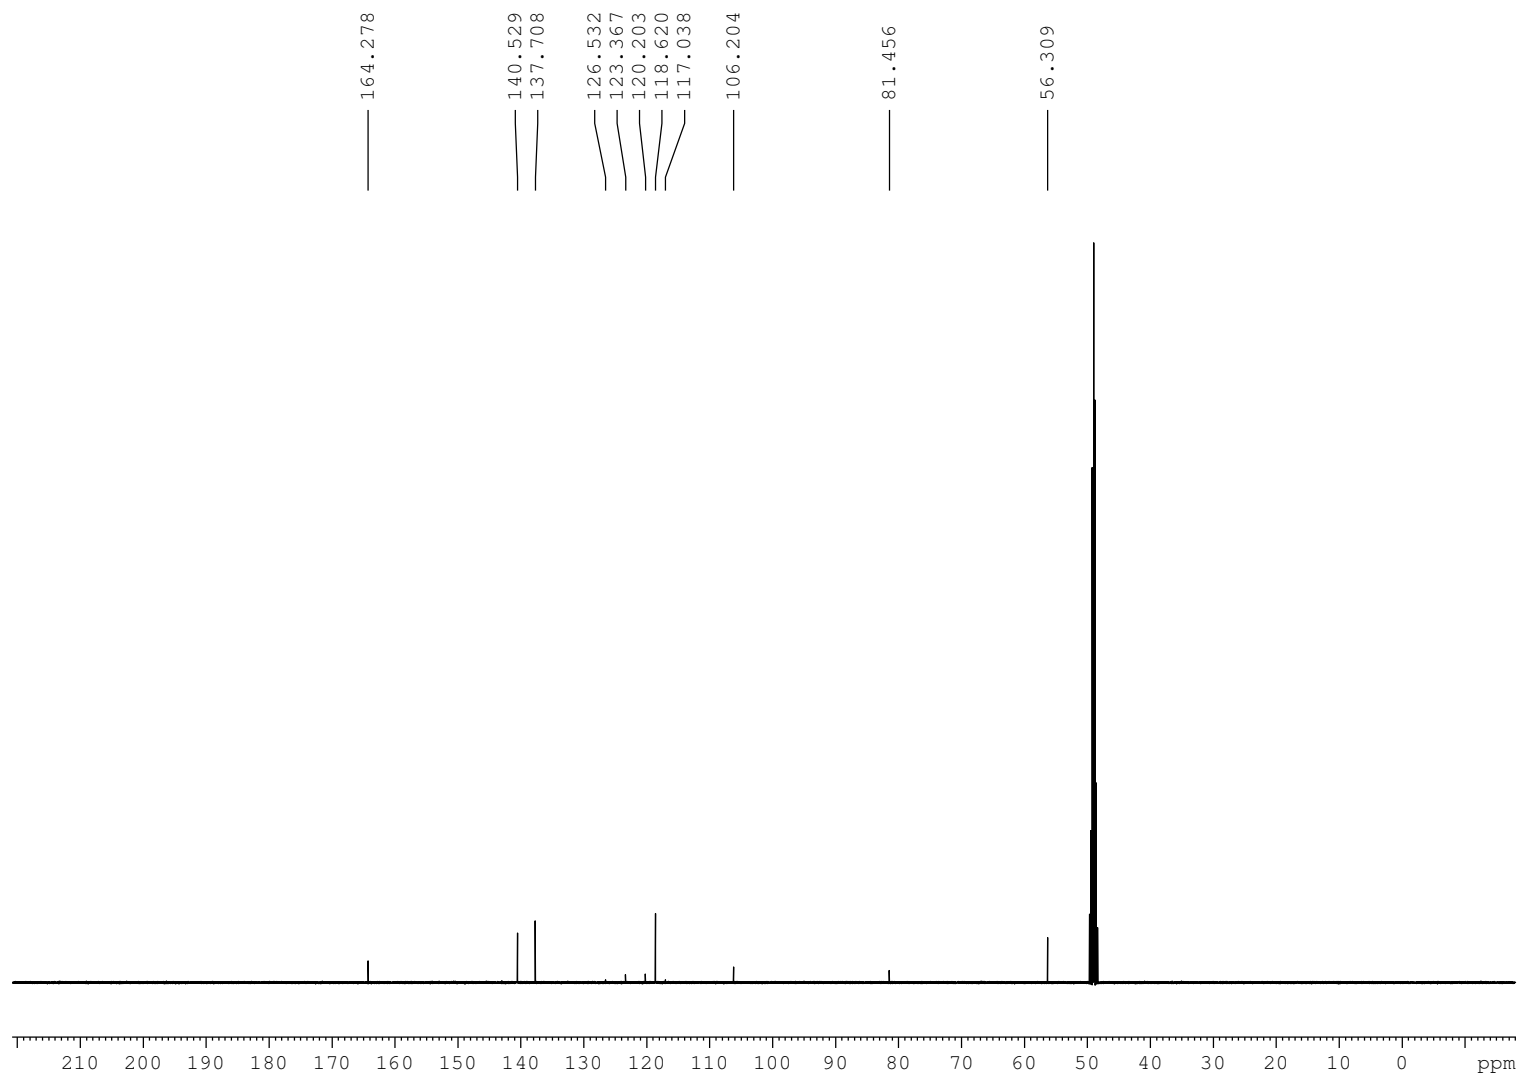

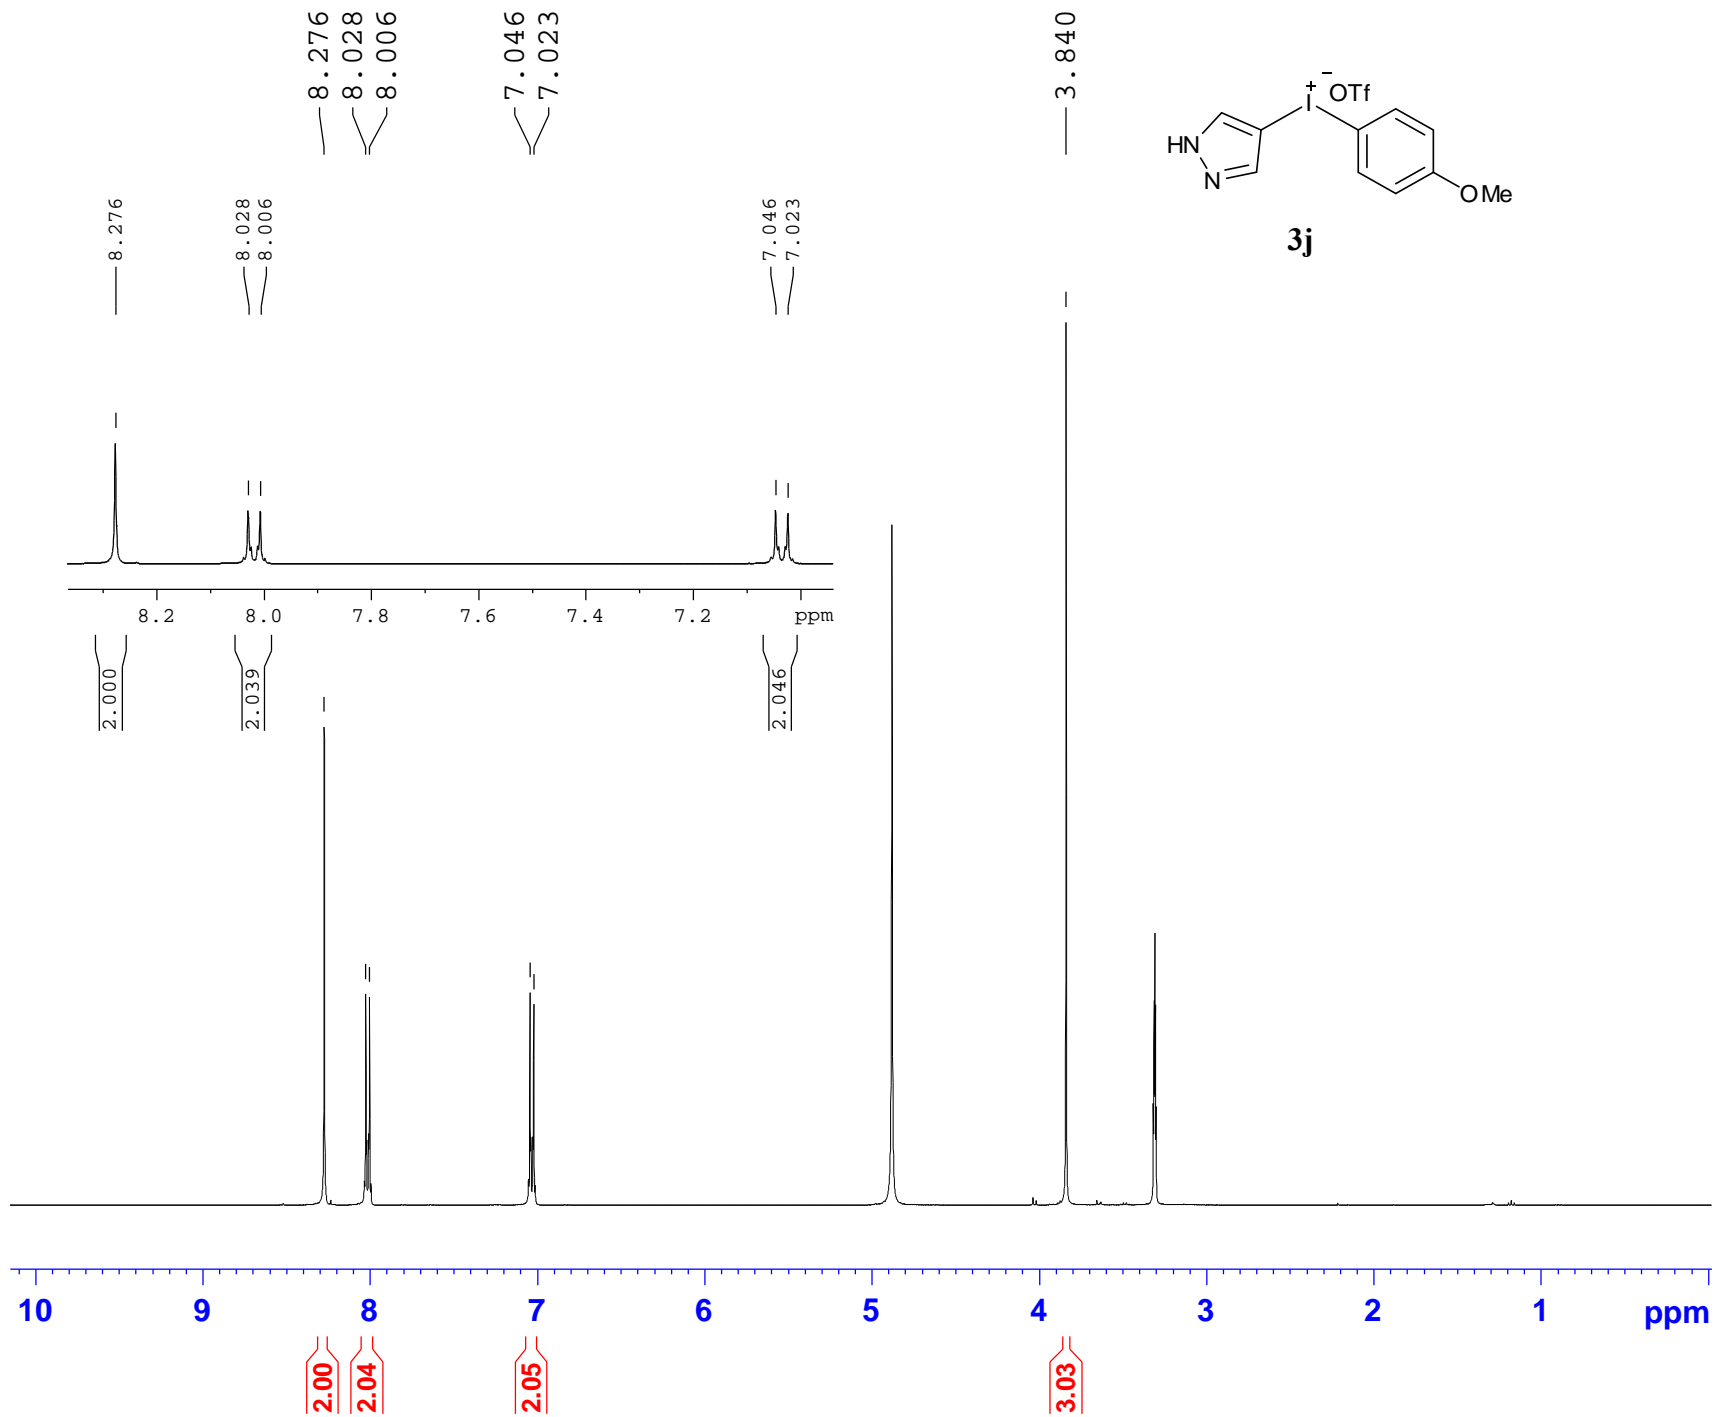

400 MHz  
MeOD

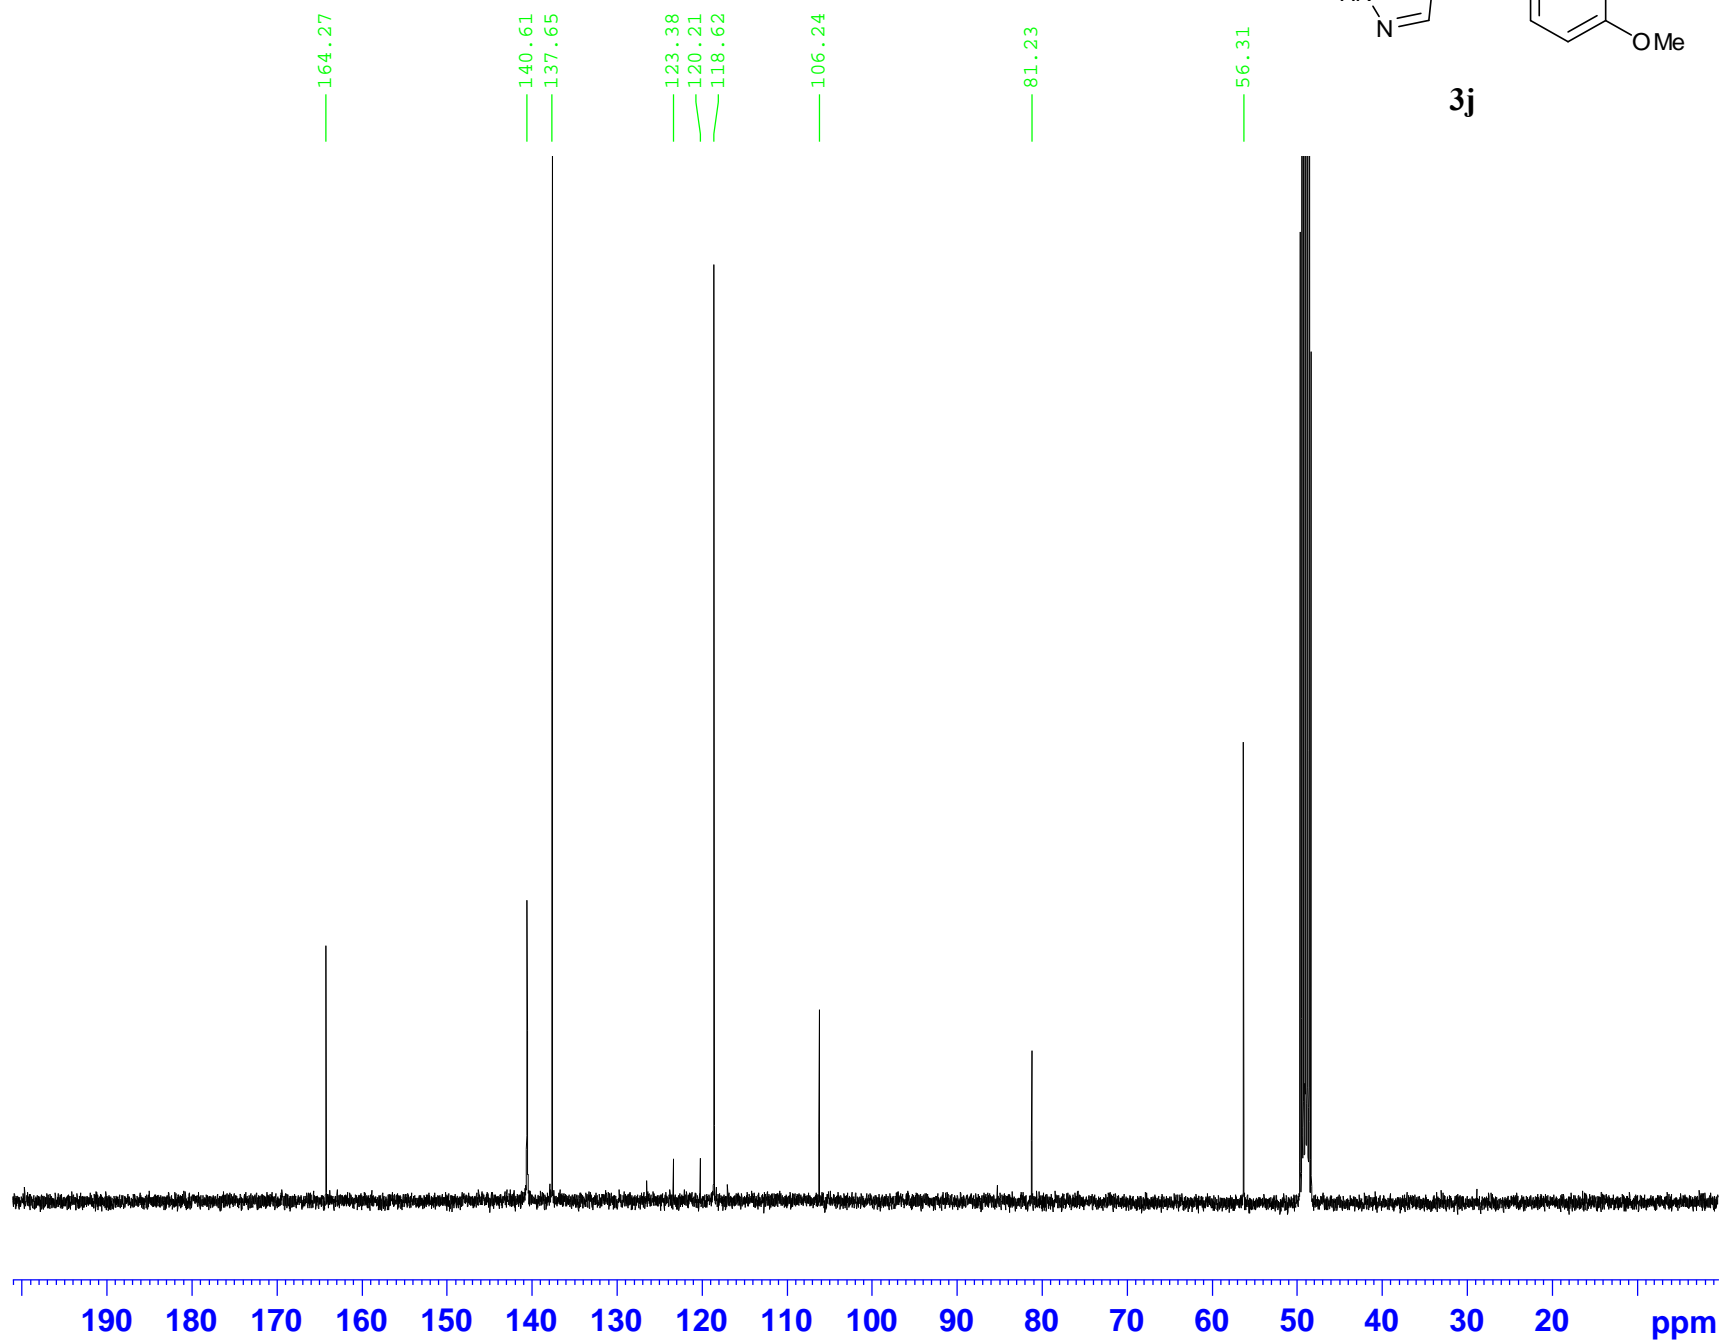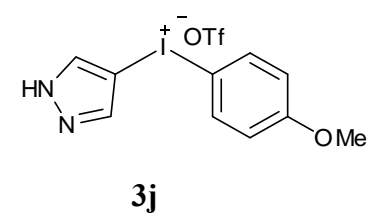

100 MHz  
MeOD

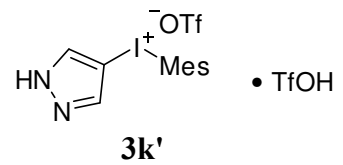

400 MHz  
MeOD

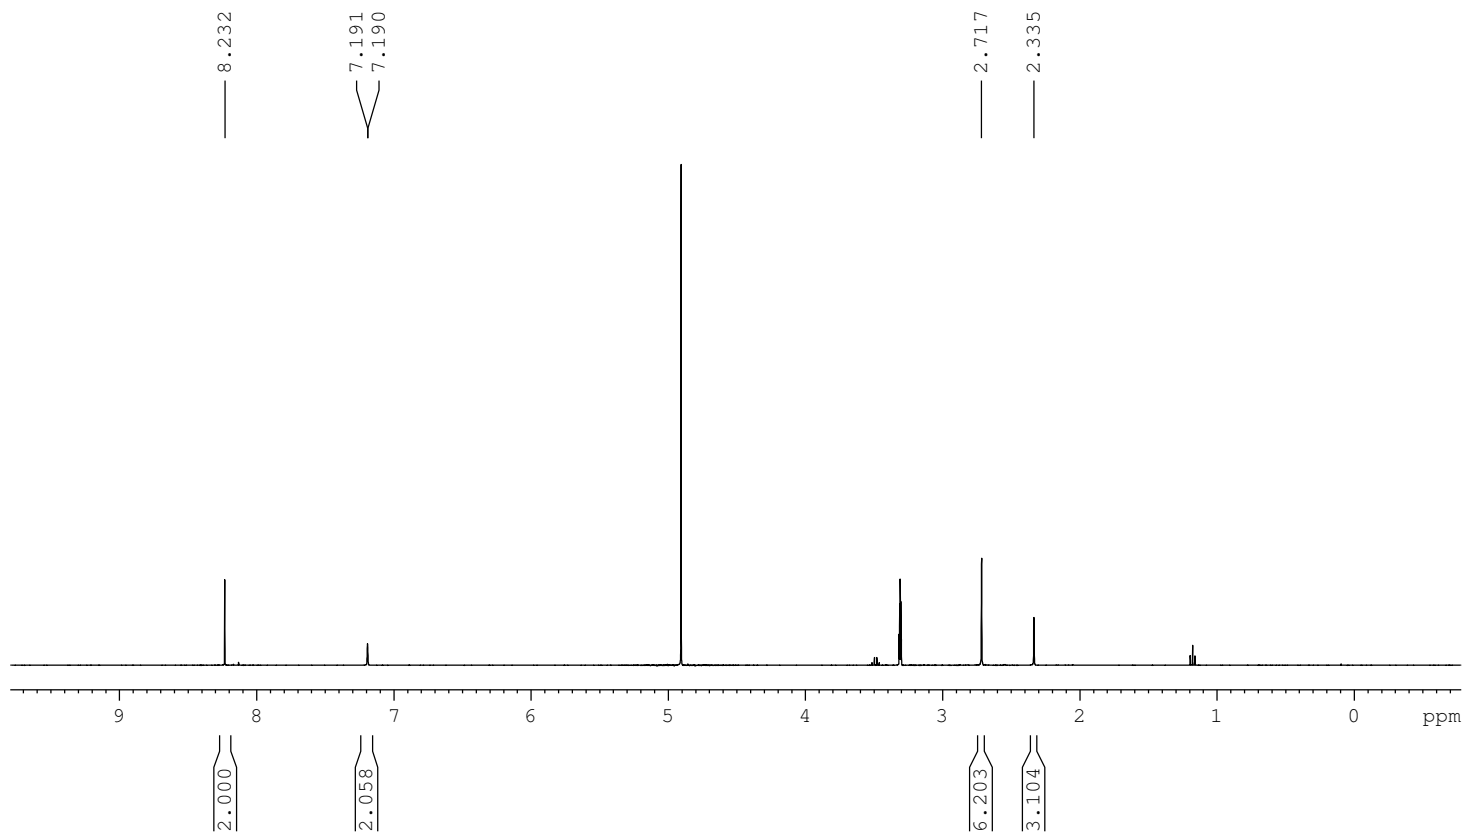

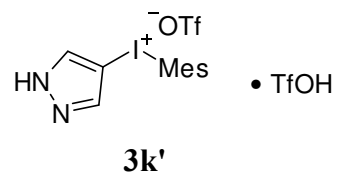

100 MHz  
MeOD

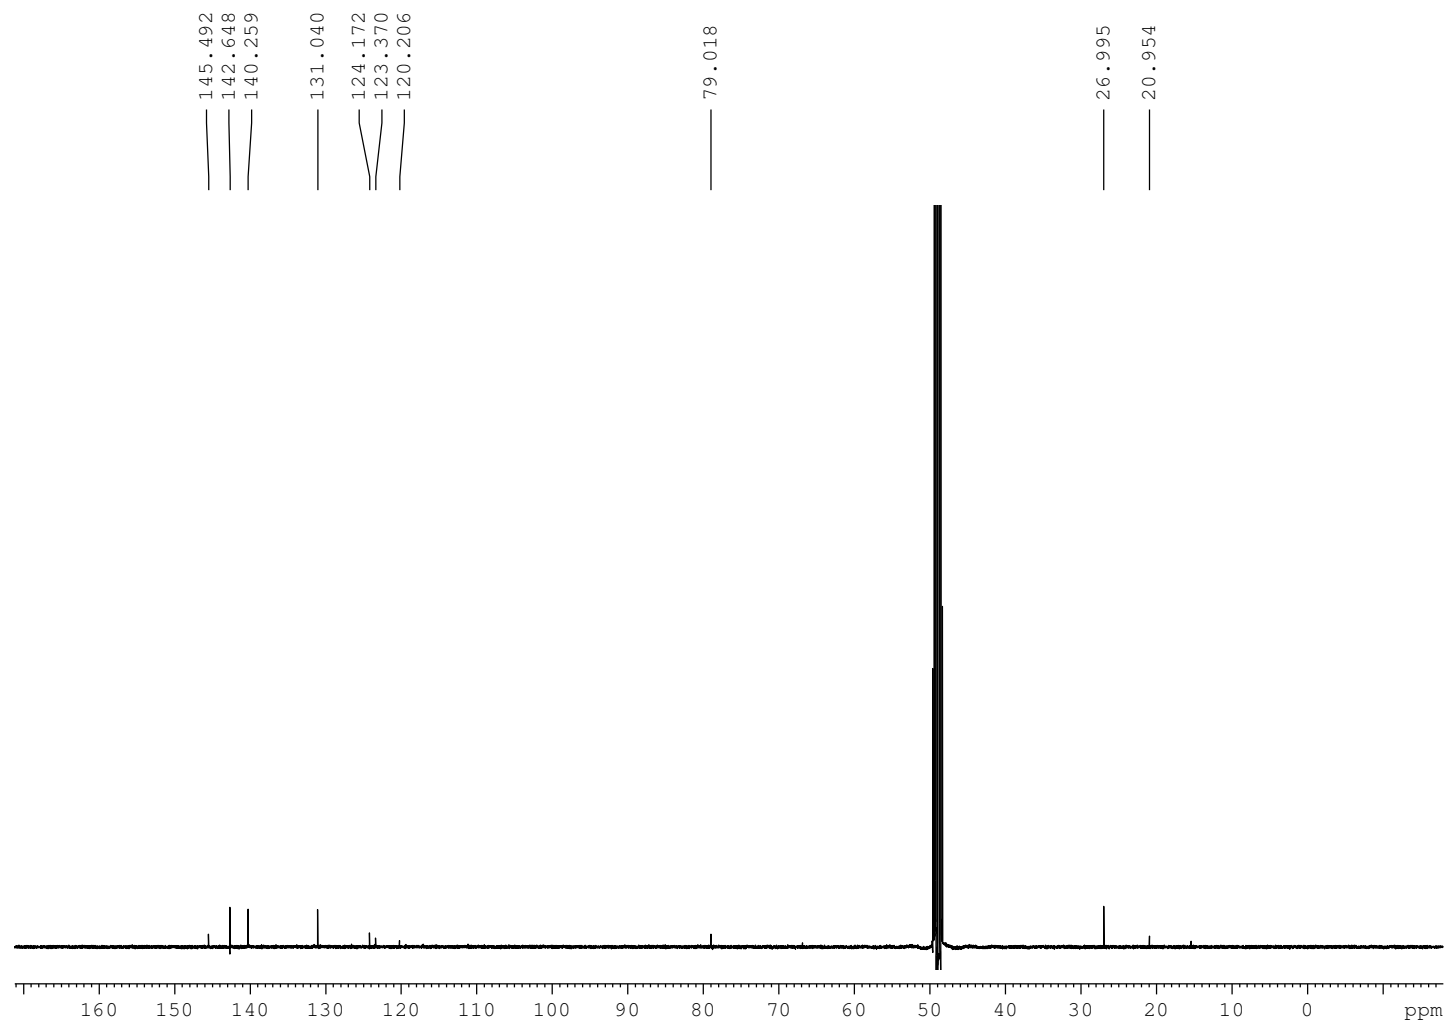

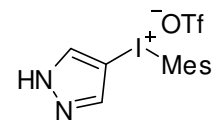

**3k**

400 MHz  
MeOD

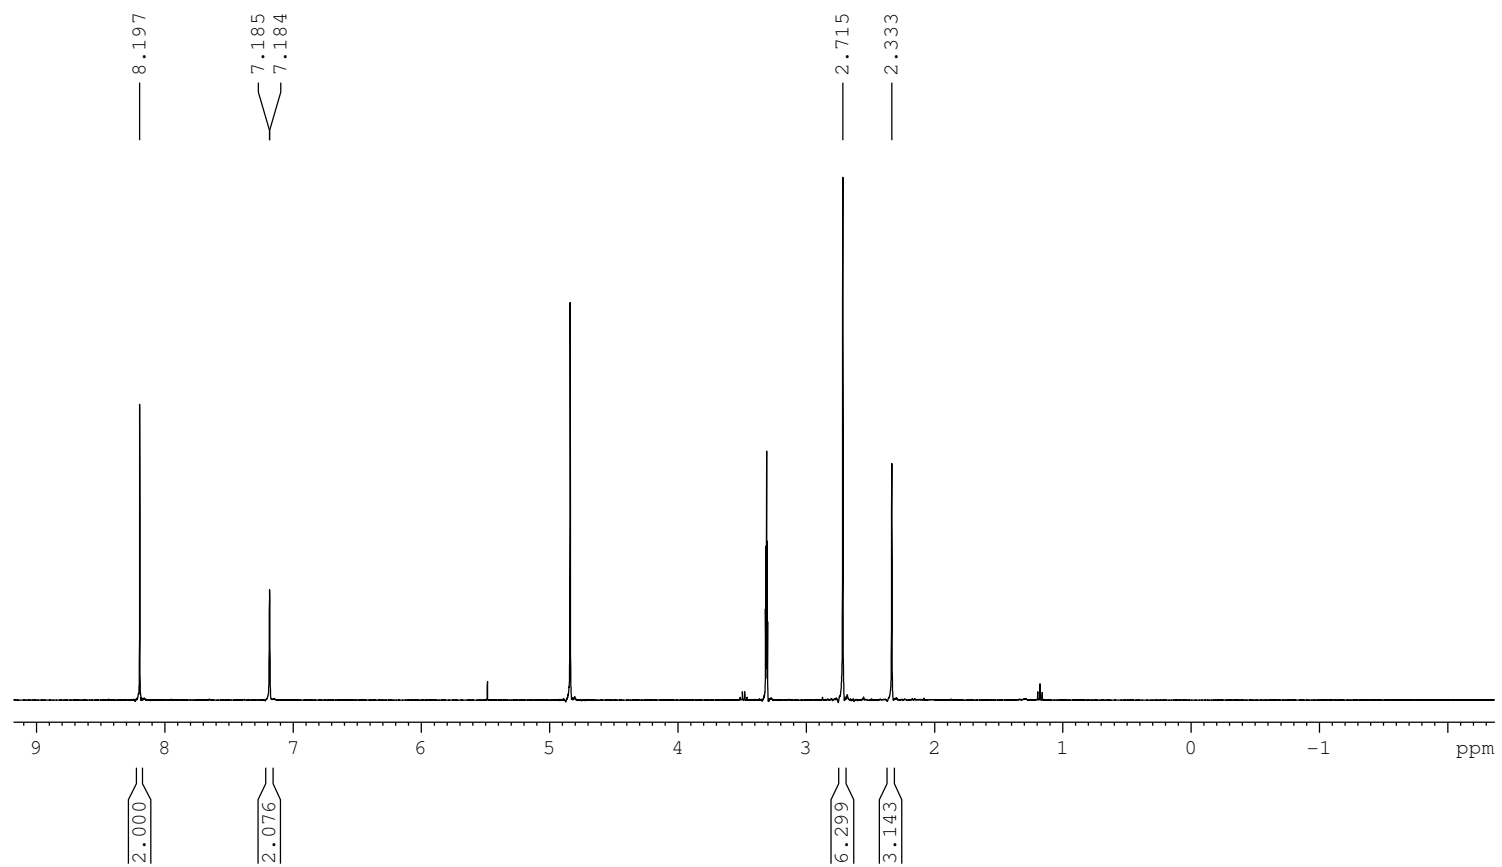



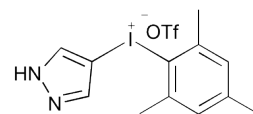

**3k**

100 MHz  
MeOD

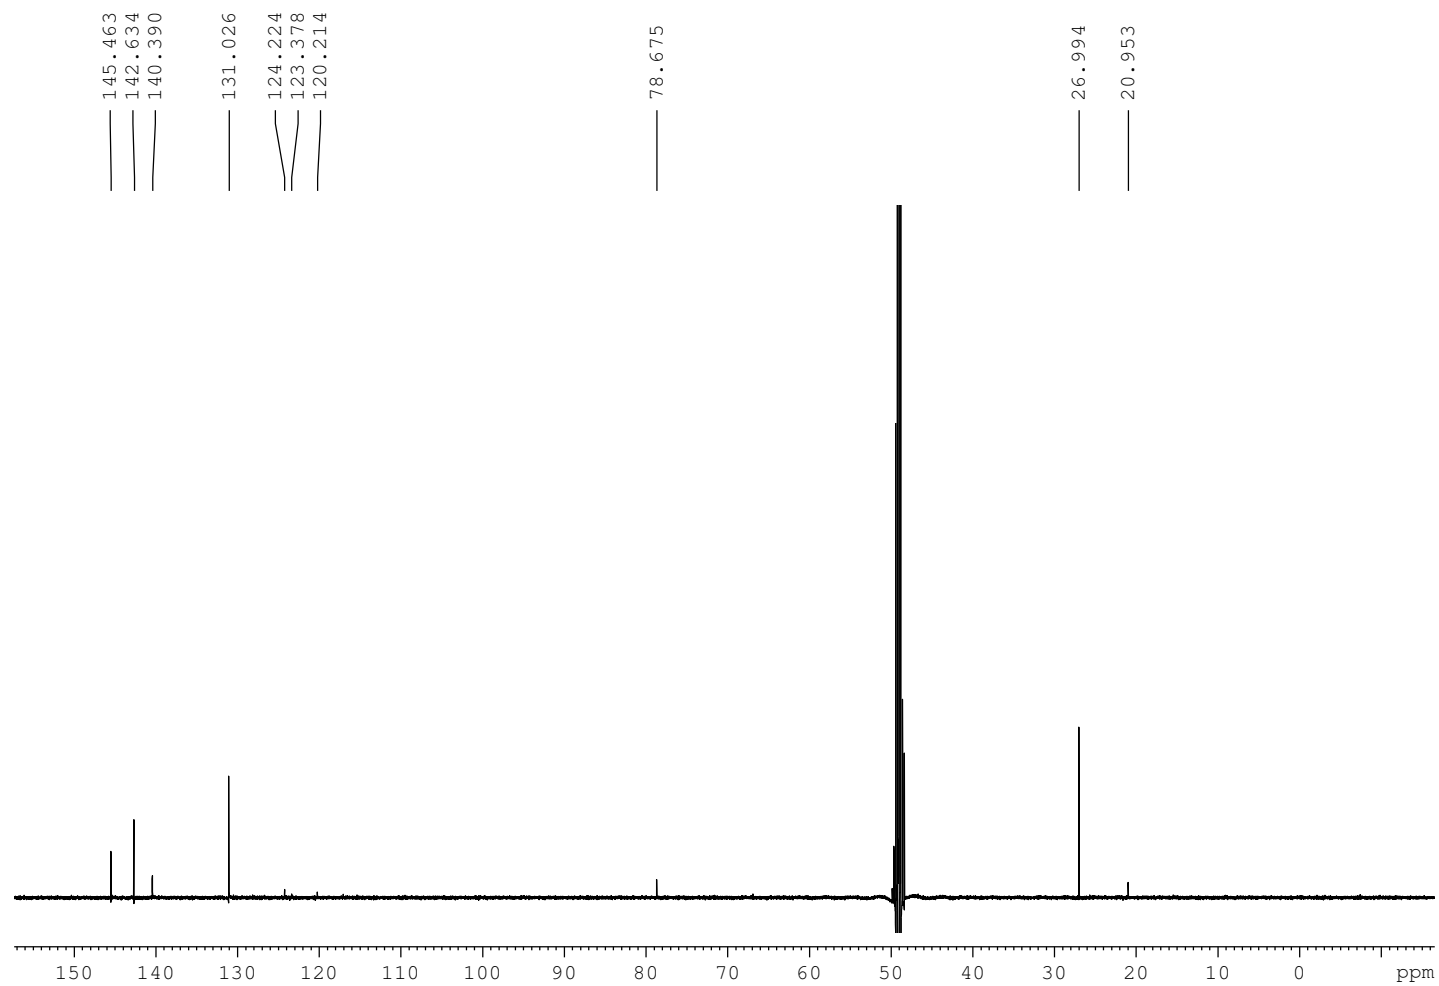

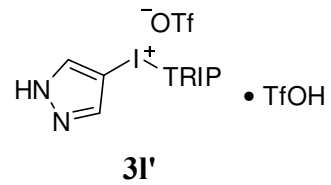

400 MHz  
MeOD

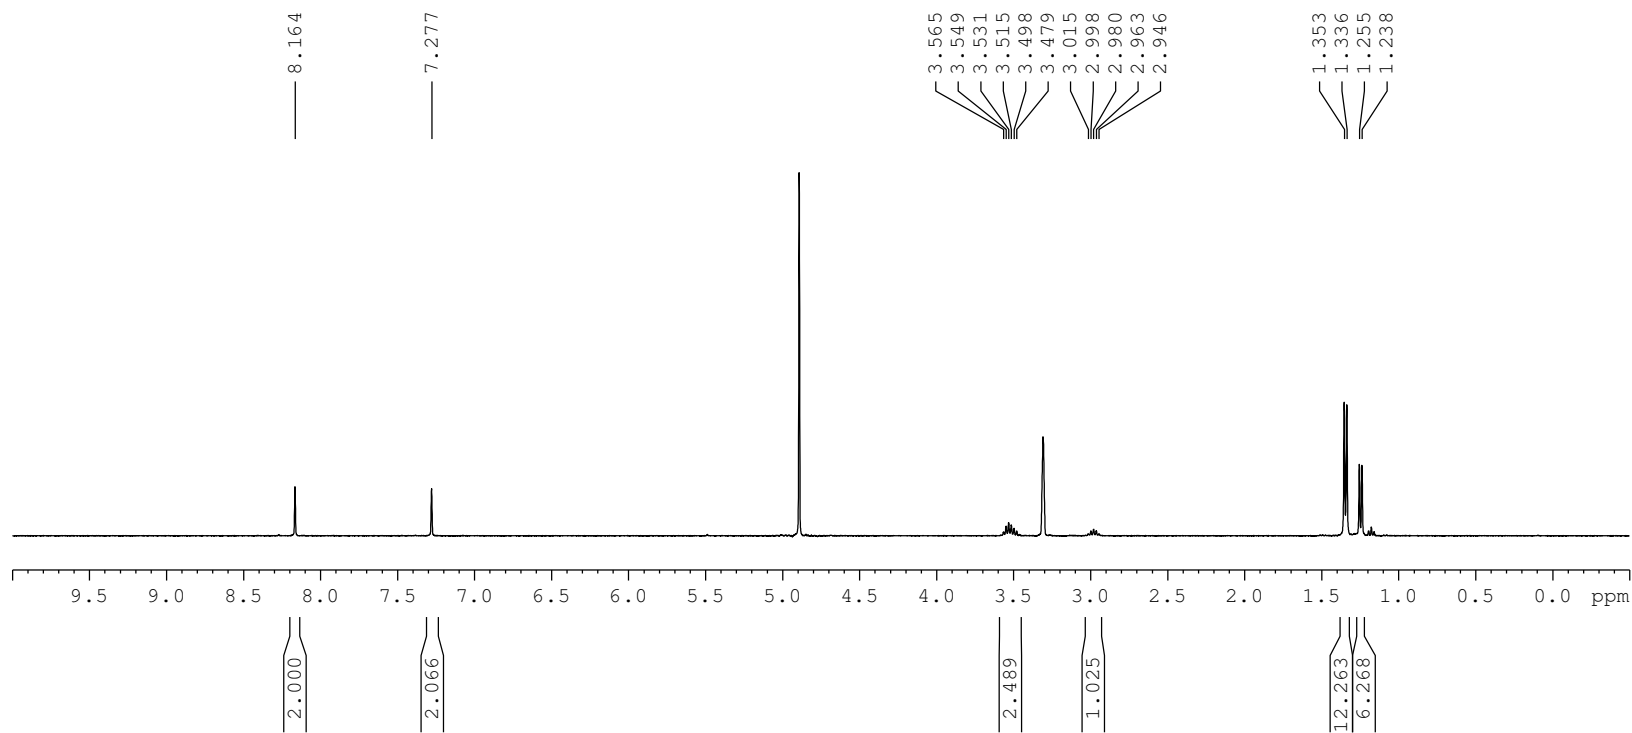

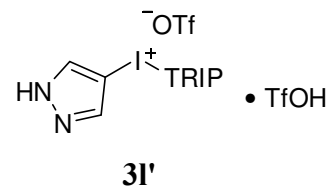

100 MHz  
MeOD

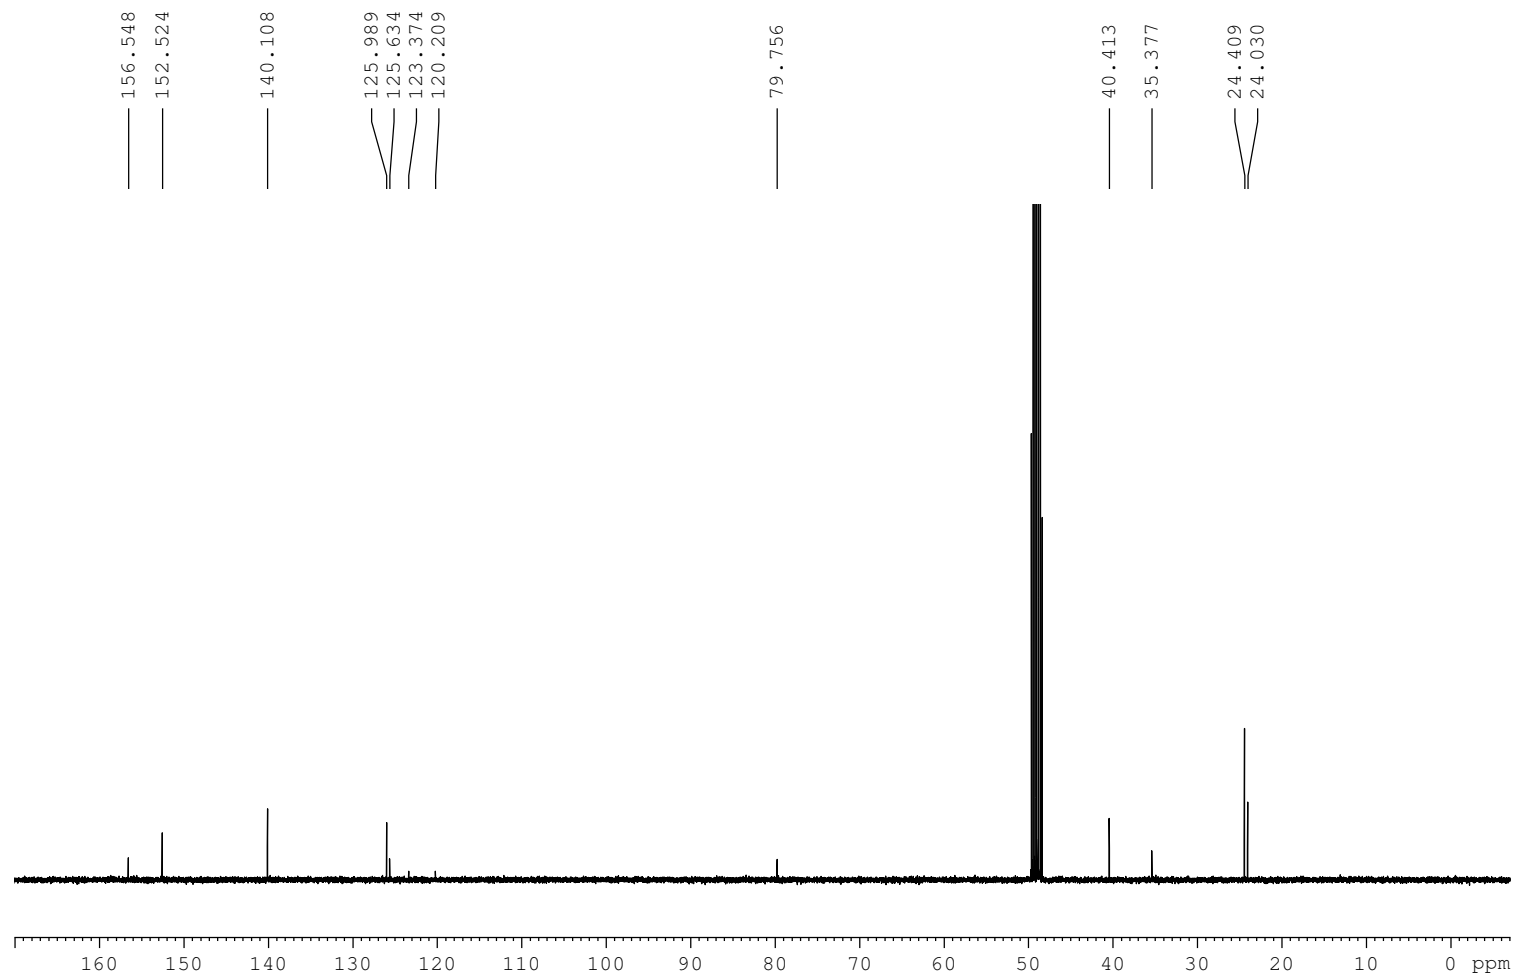

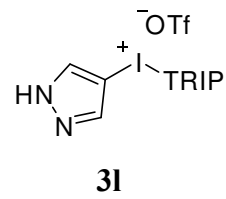

400 MHz  
MeOD

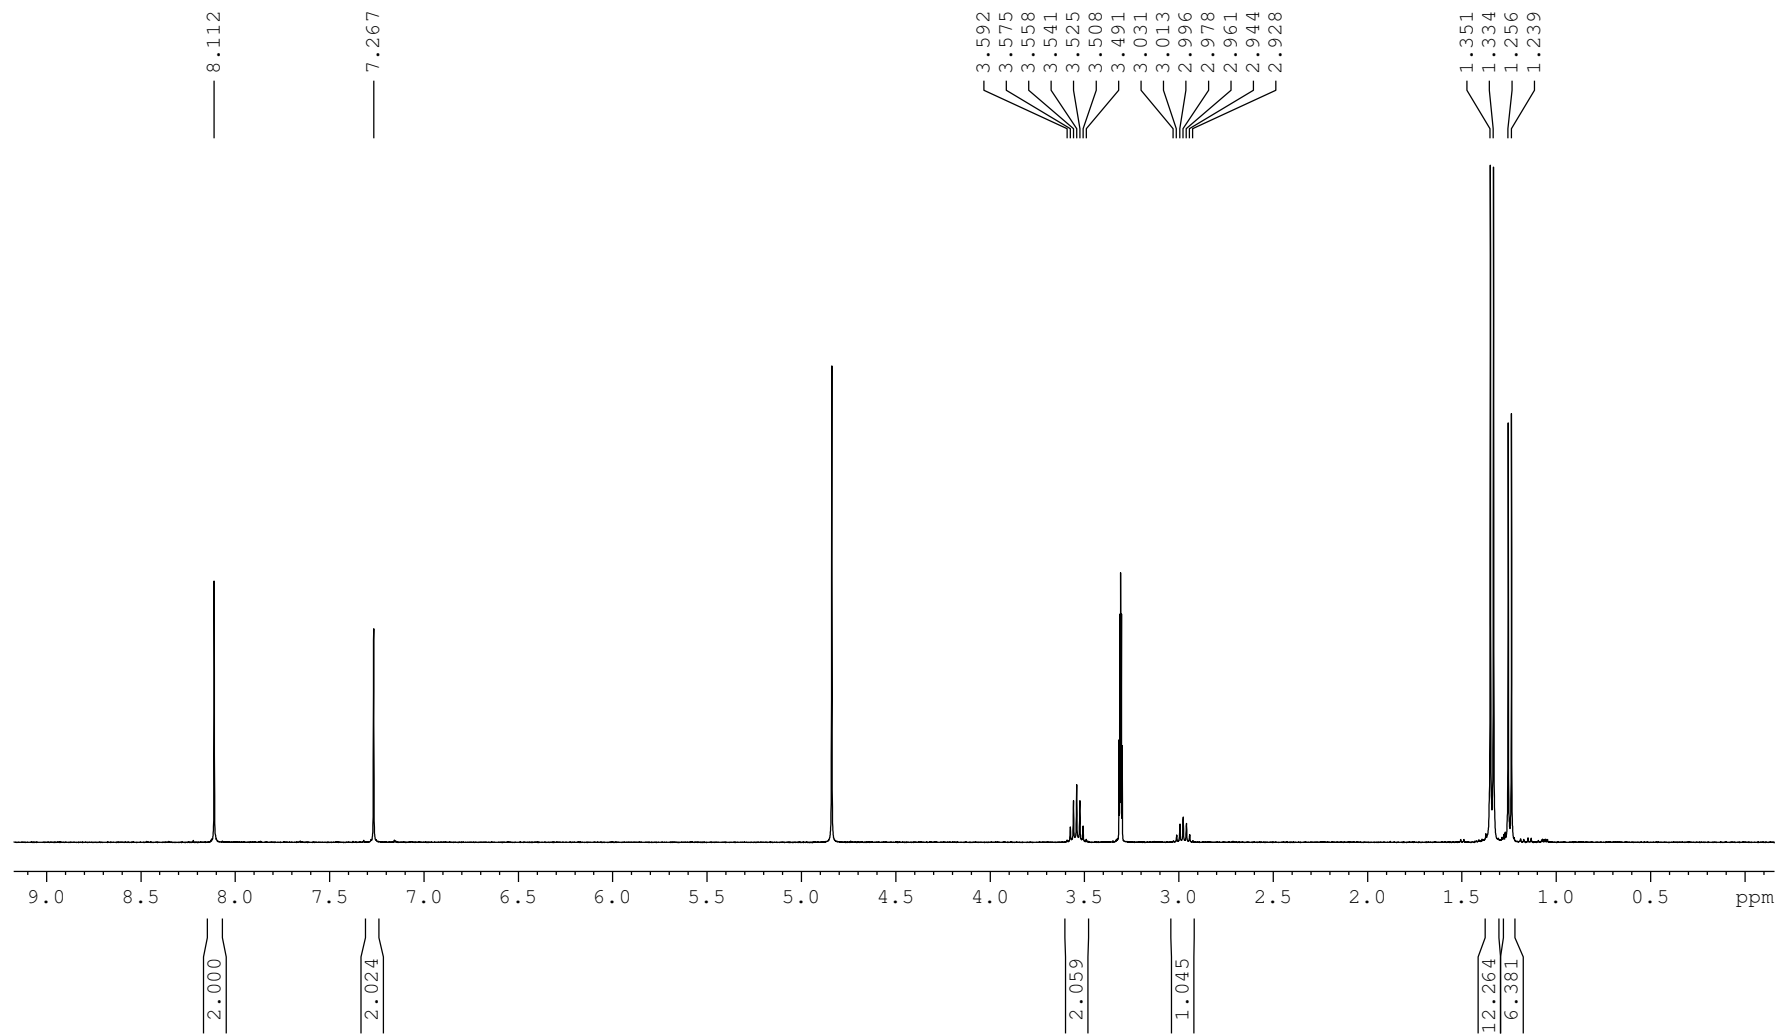

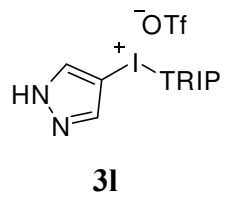

100 MHz  
MeOD

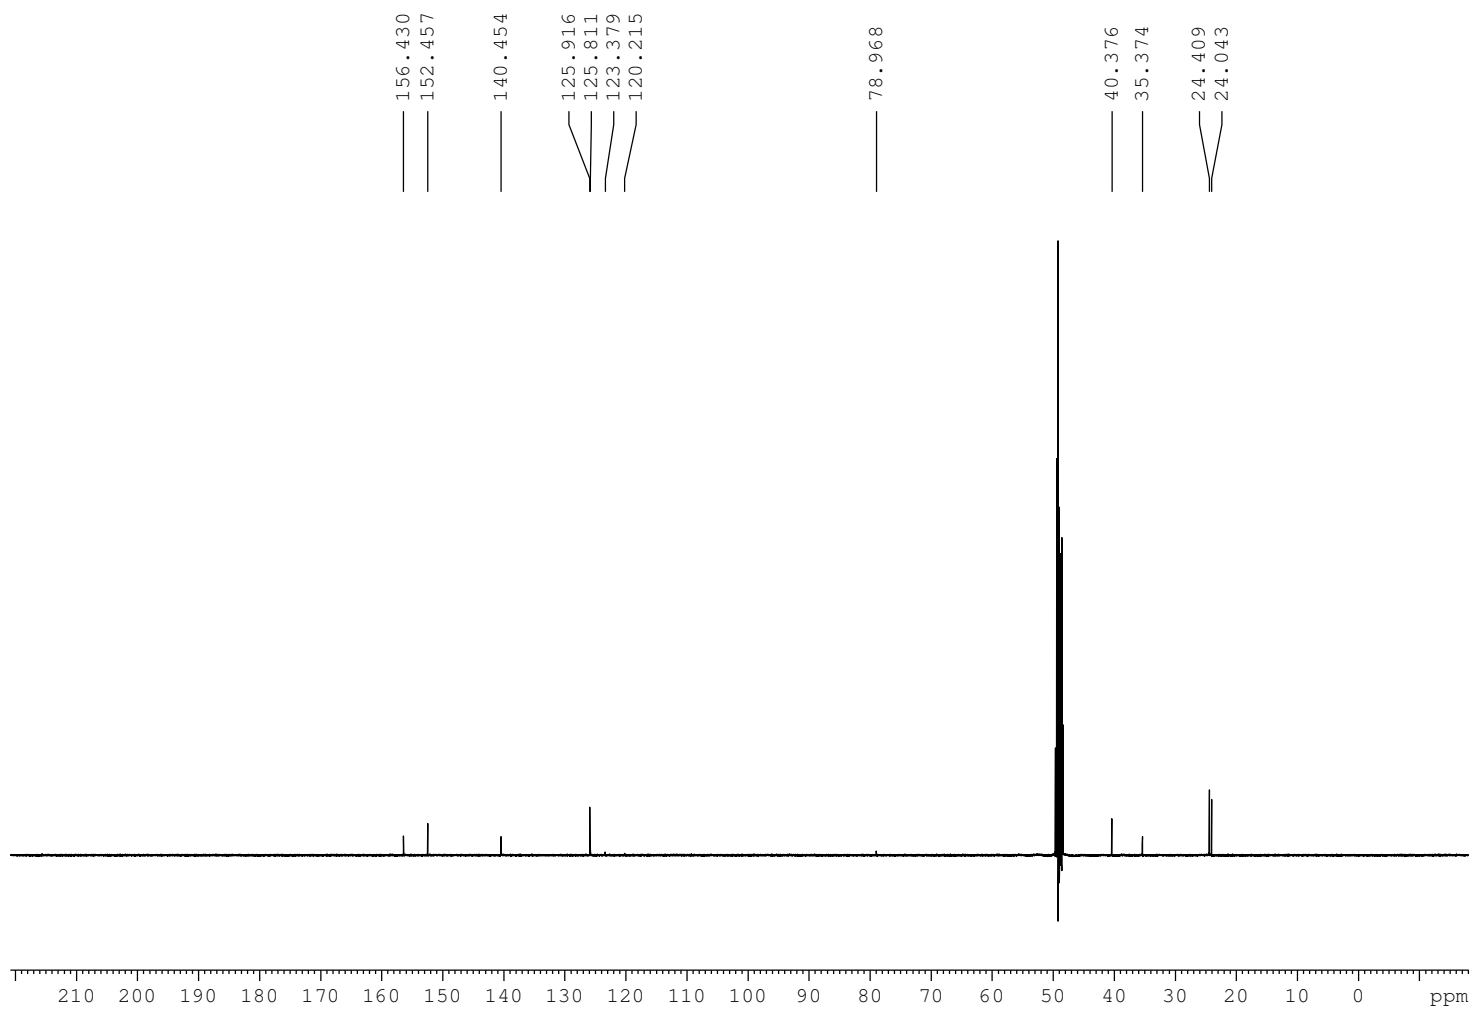

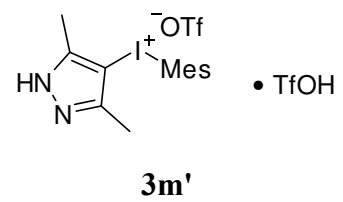

400 MHz  
MeOD

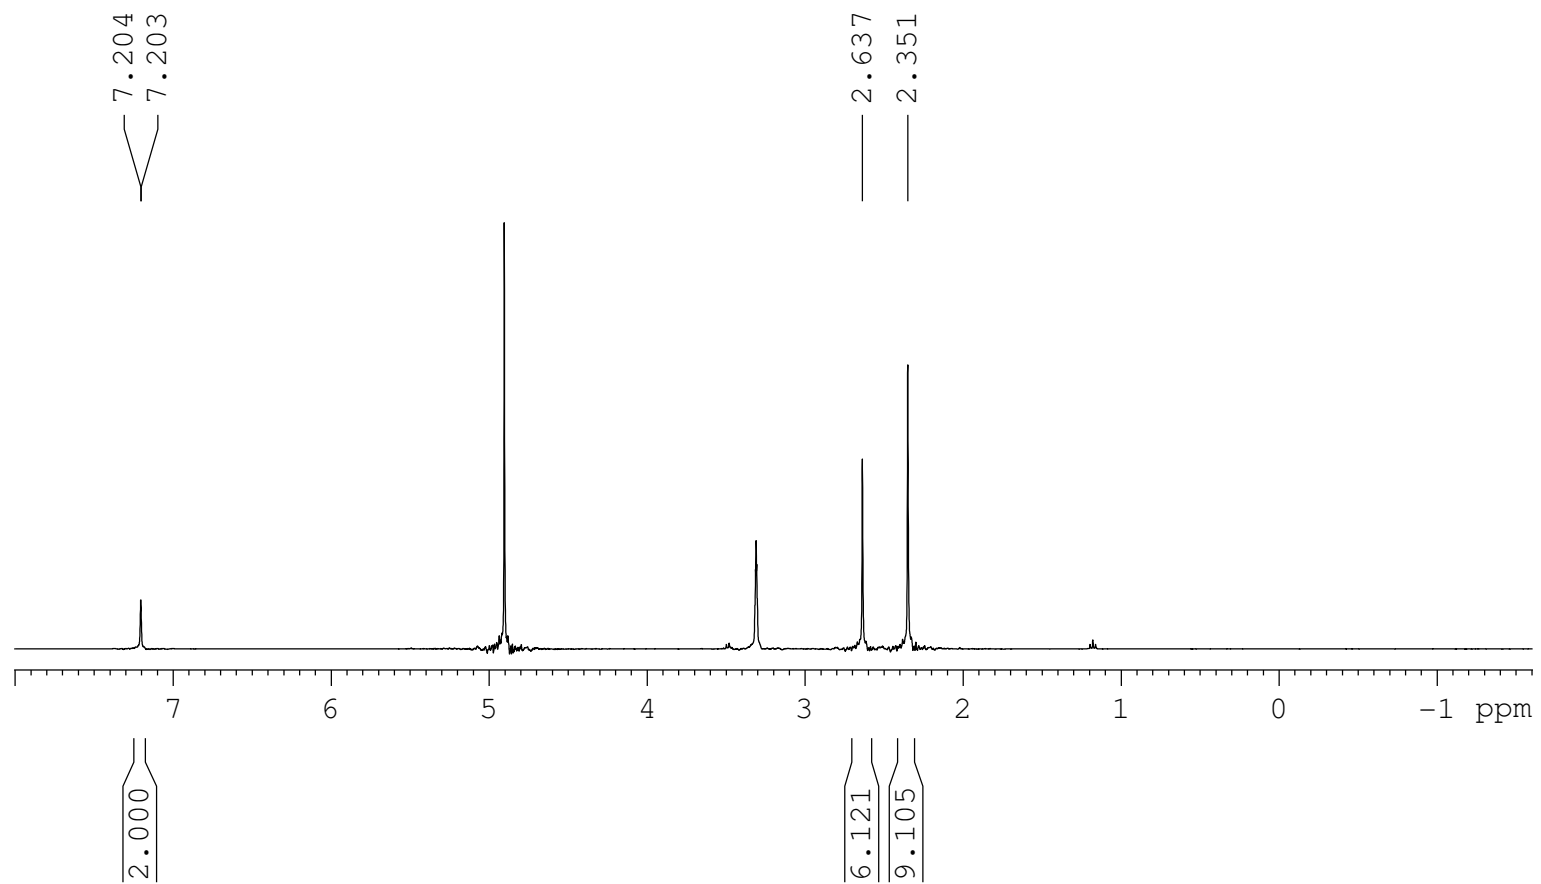

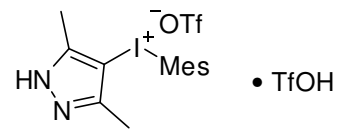

3m'

100 MHz  
MeOD

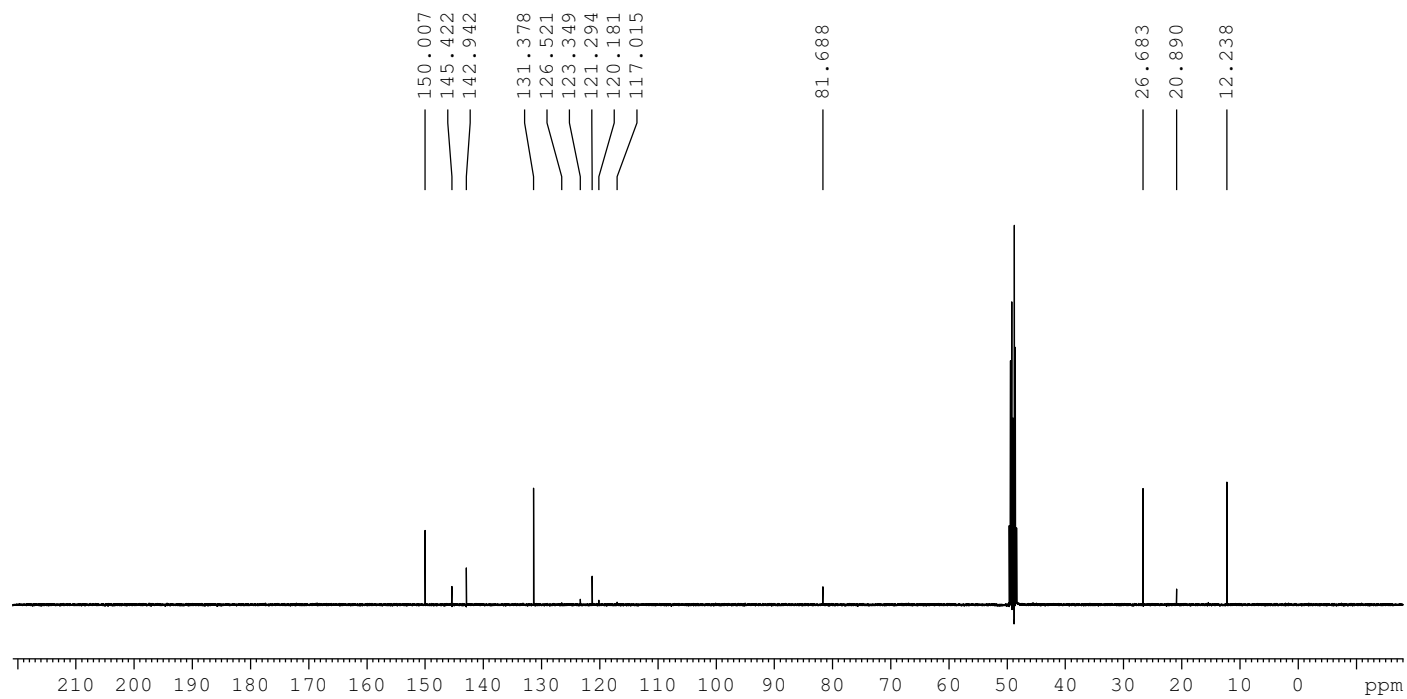

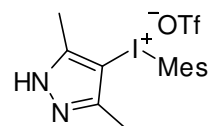

**3m**

400 MHz  
MeOD

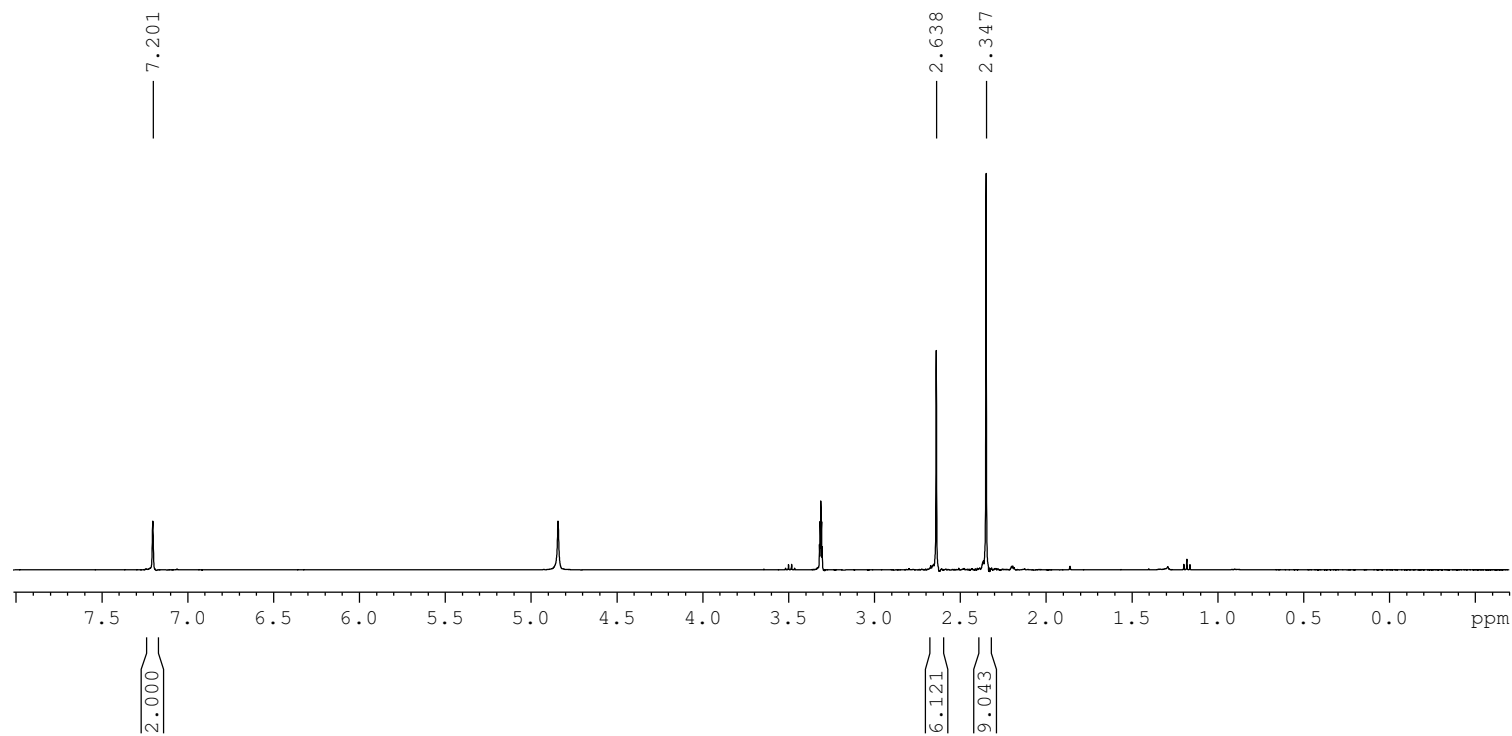



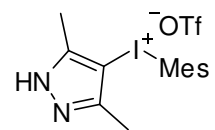

**3m**

400 MHz  
MeOD

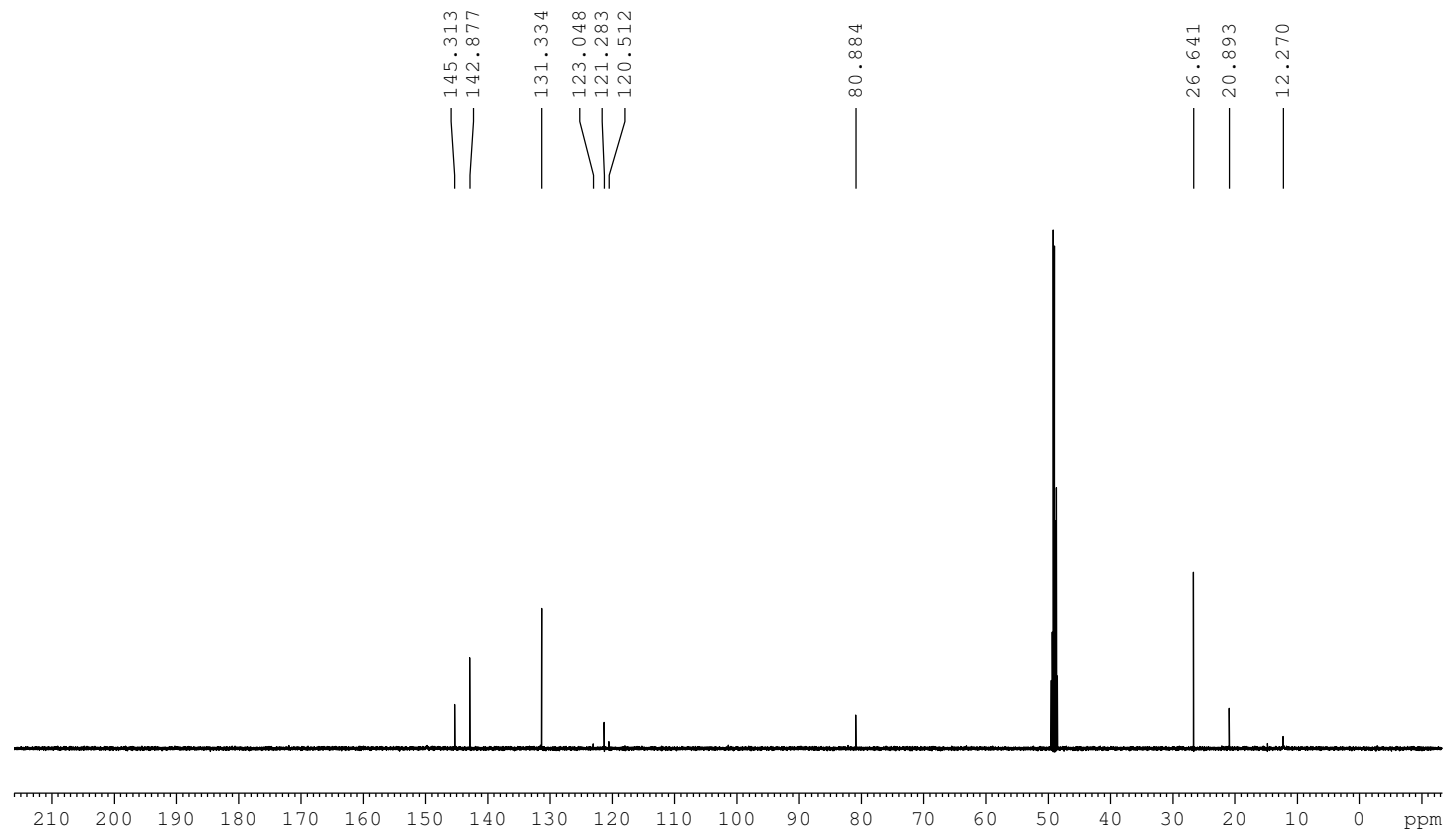

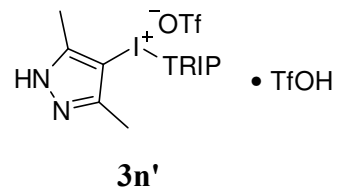

400 MHz  
MeOD

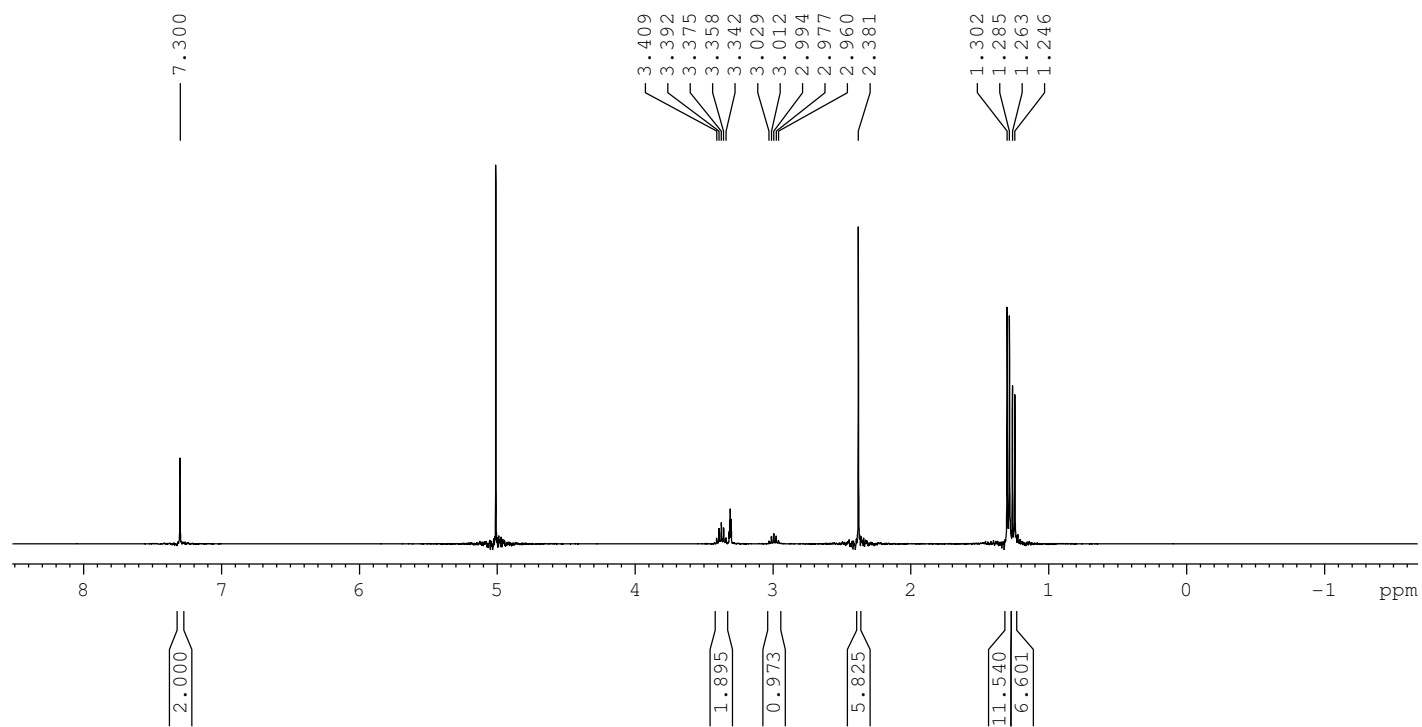

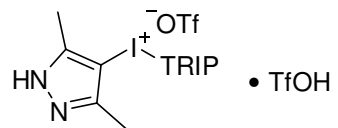

**3n'**

100 MHz  
MeOD

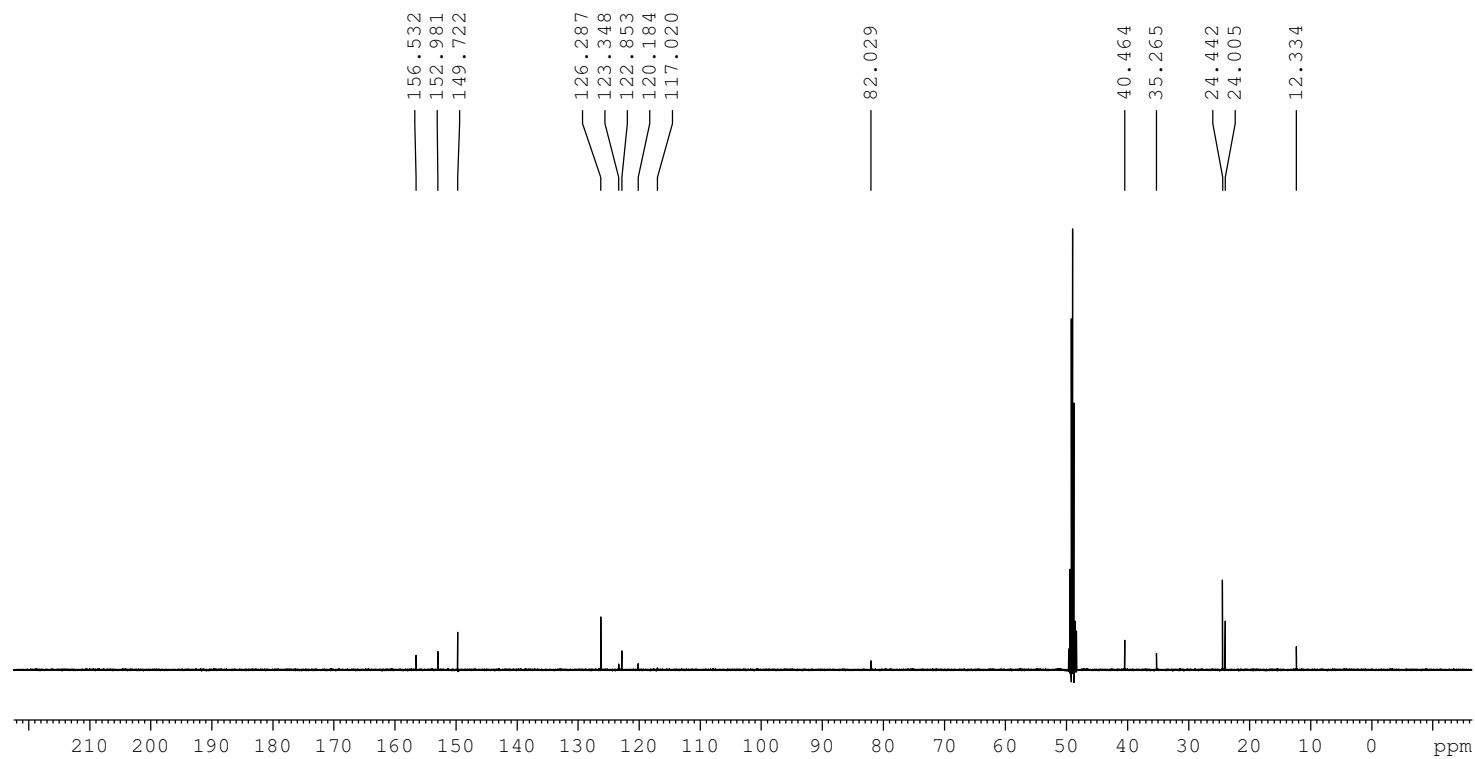

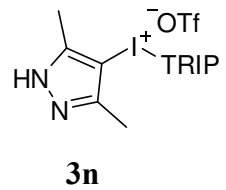

400 MHz  
MeOD

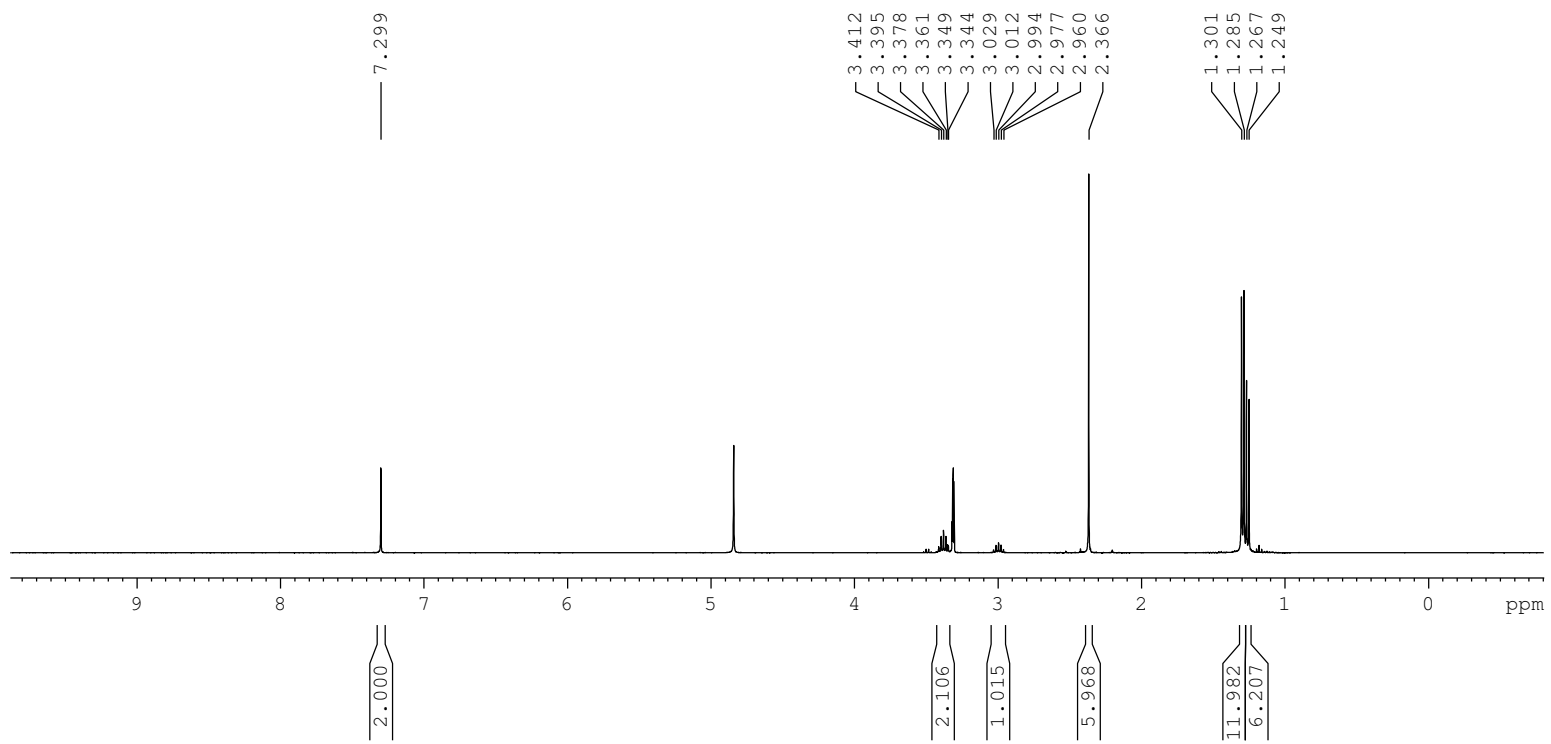

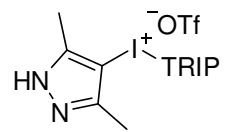

**3n**

100 MHz  
MeOD

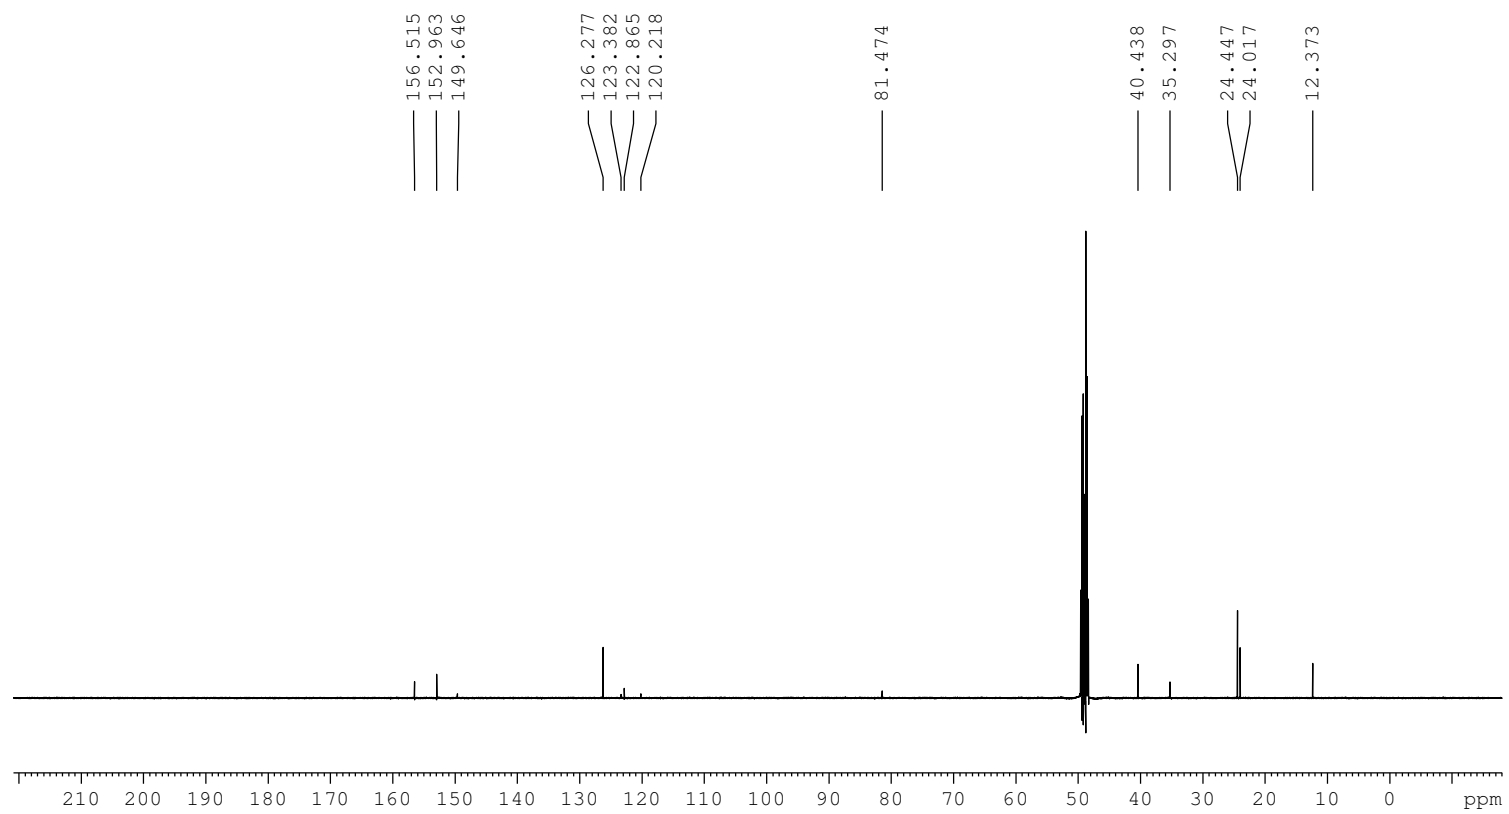

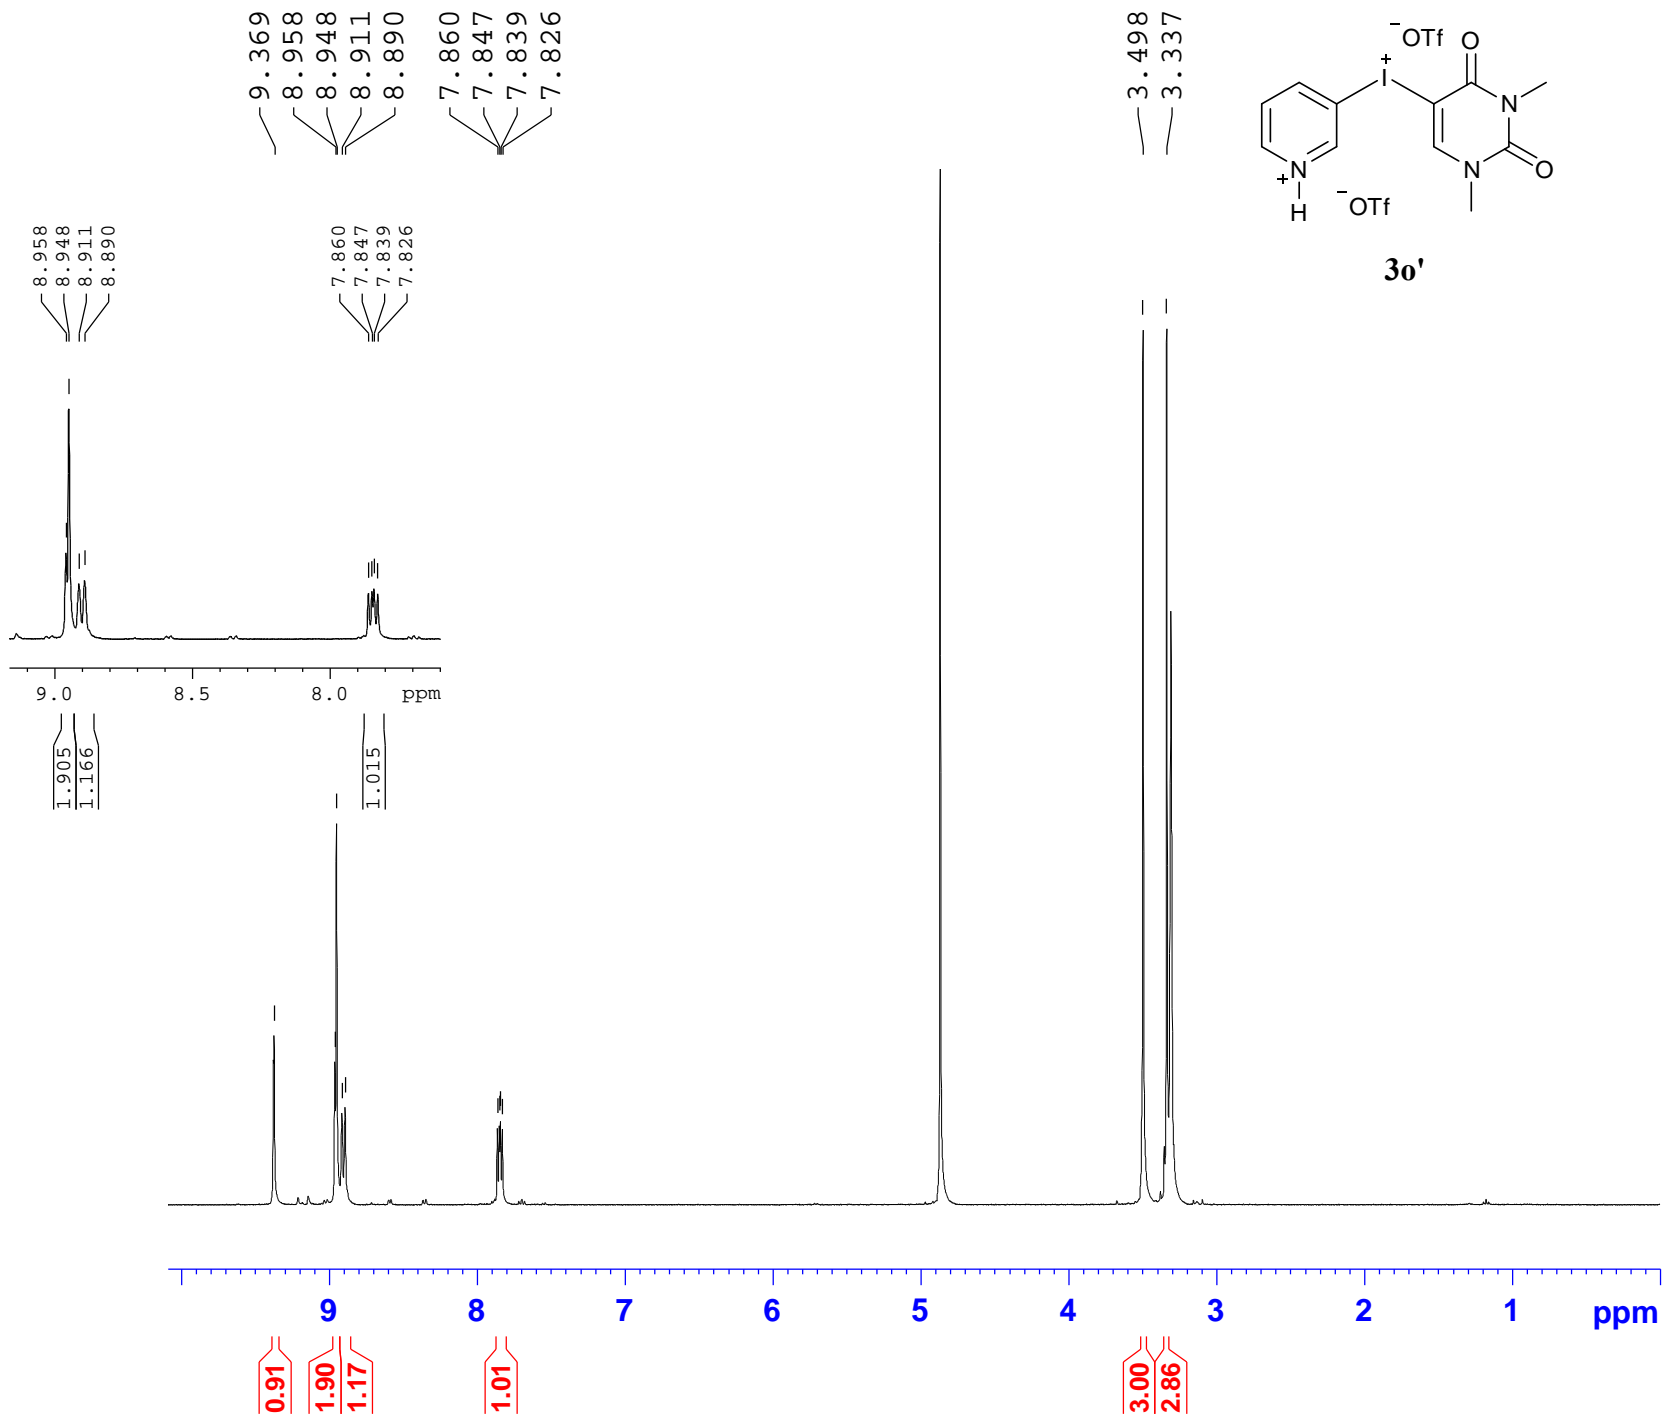

400 MHz  
MeOD

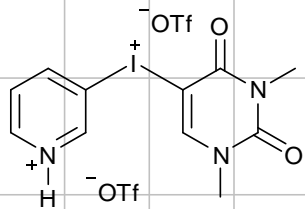

30'

400 MHz  
MeOD

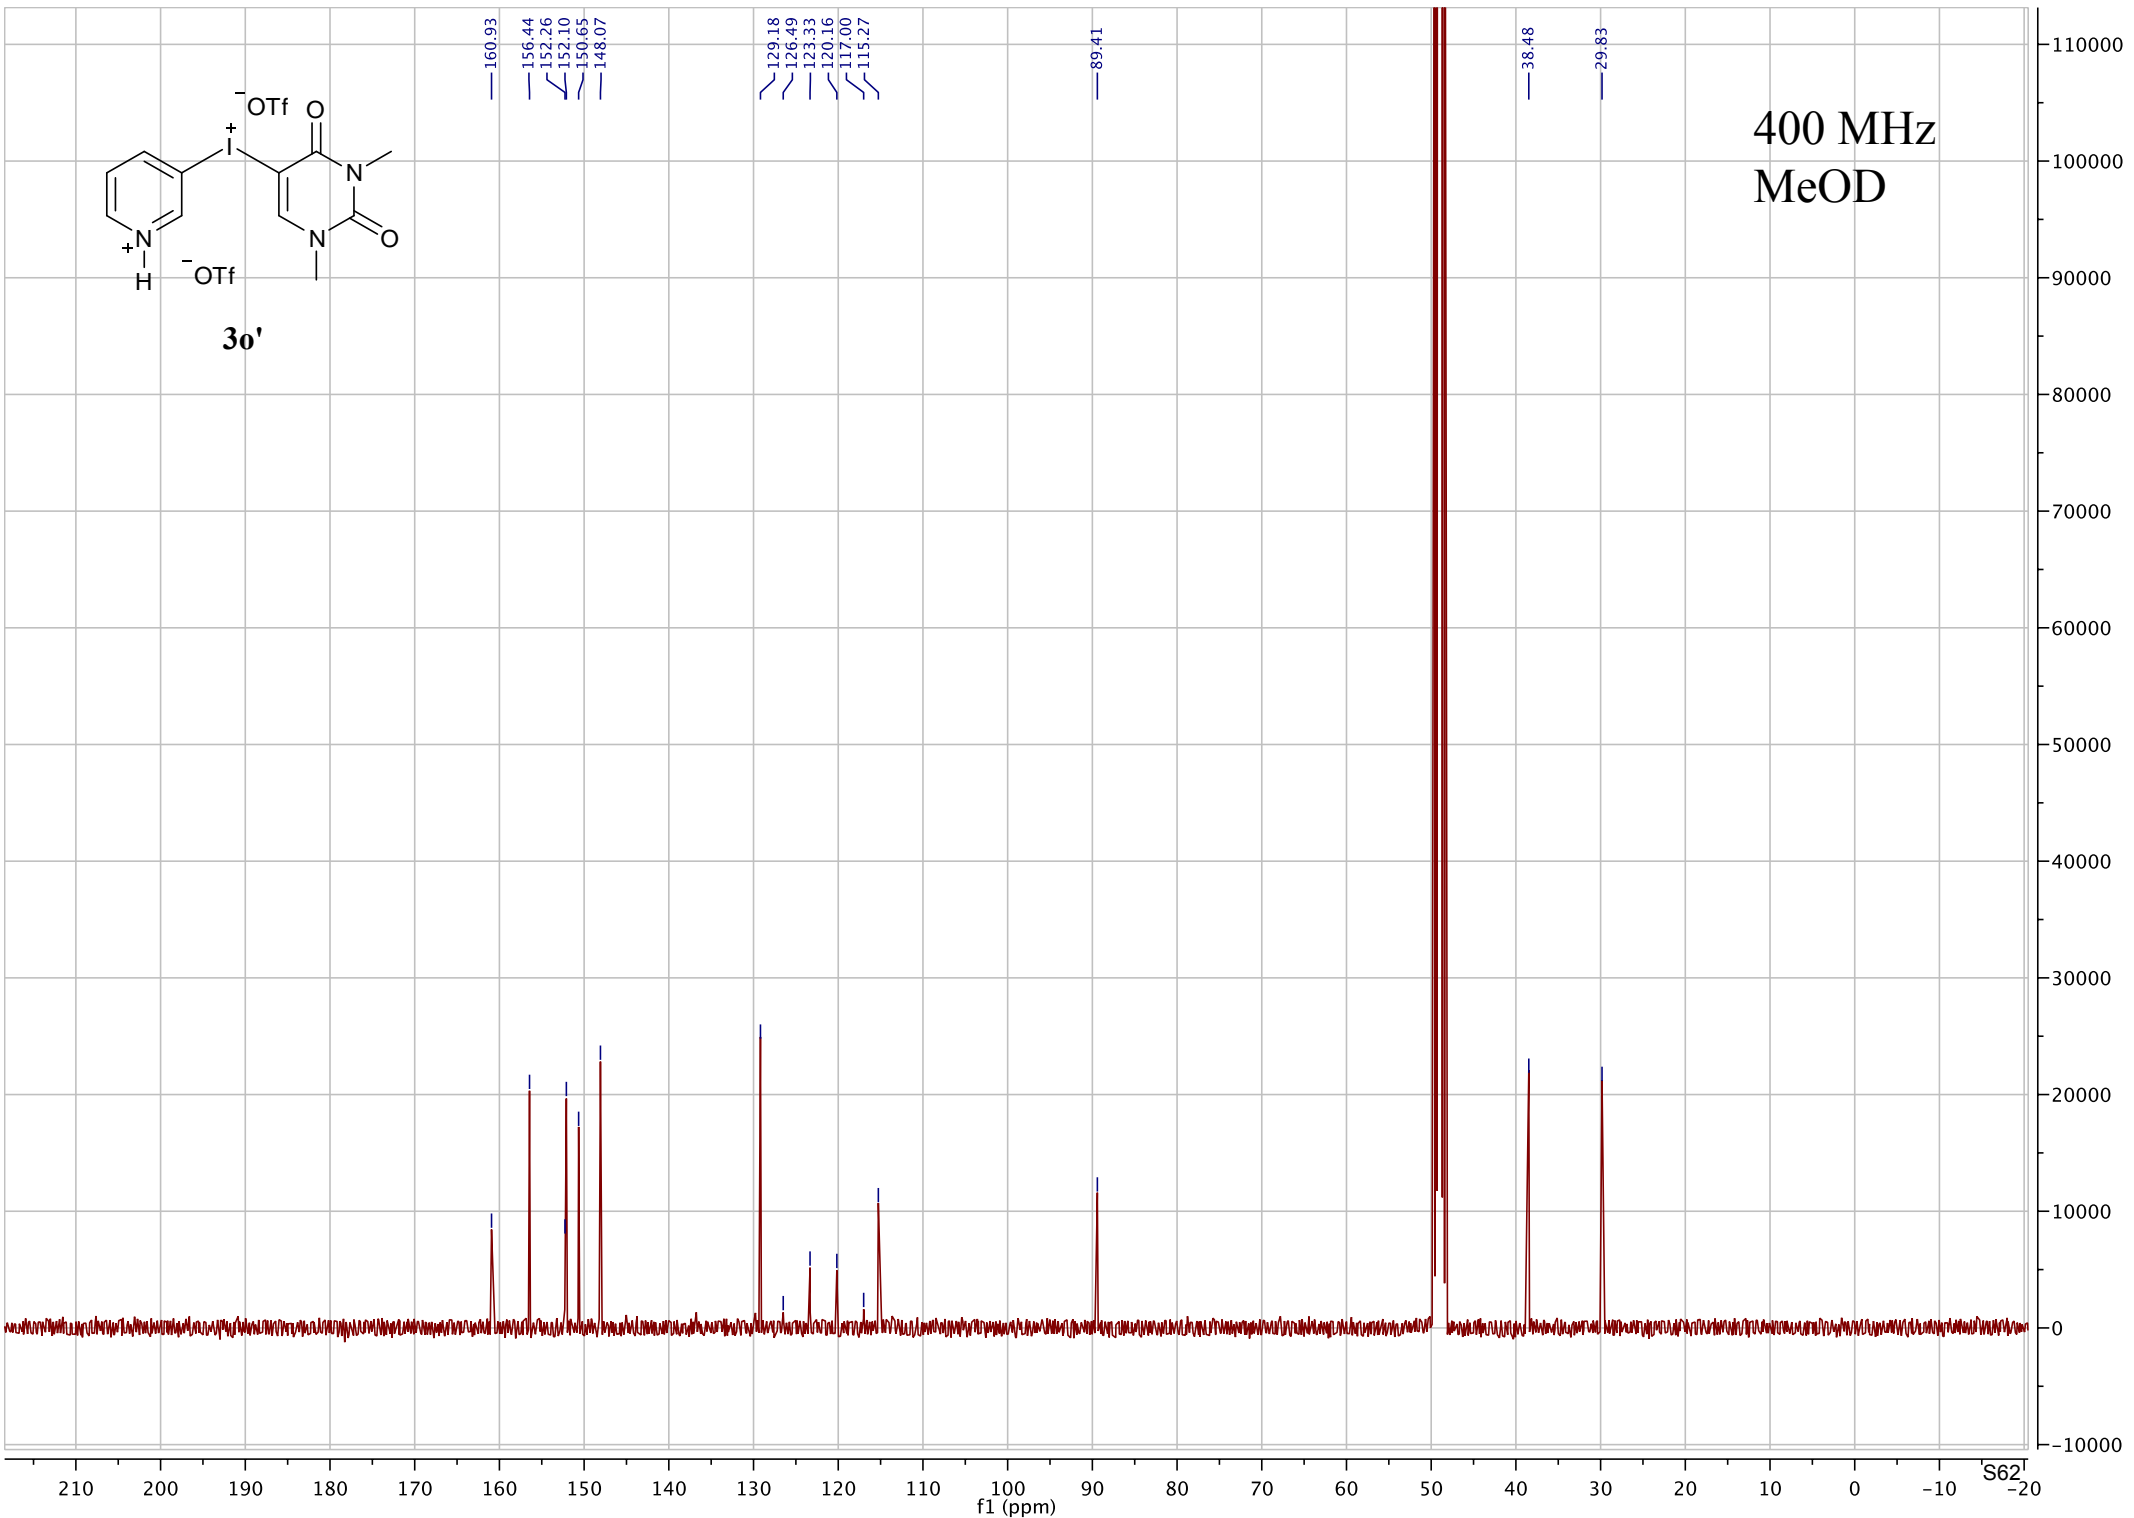

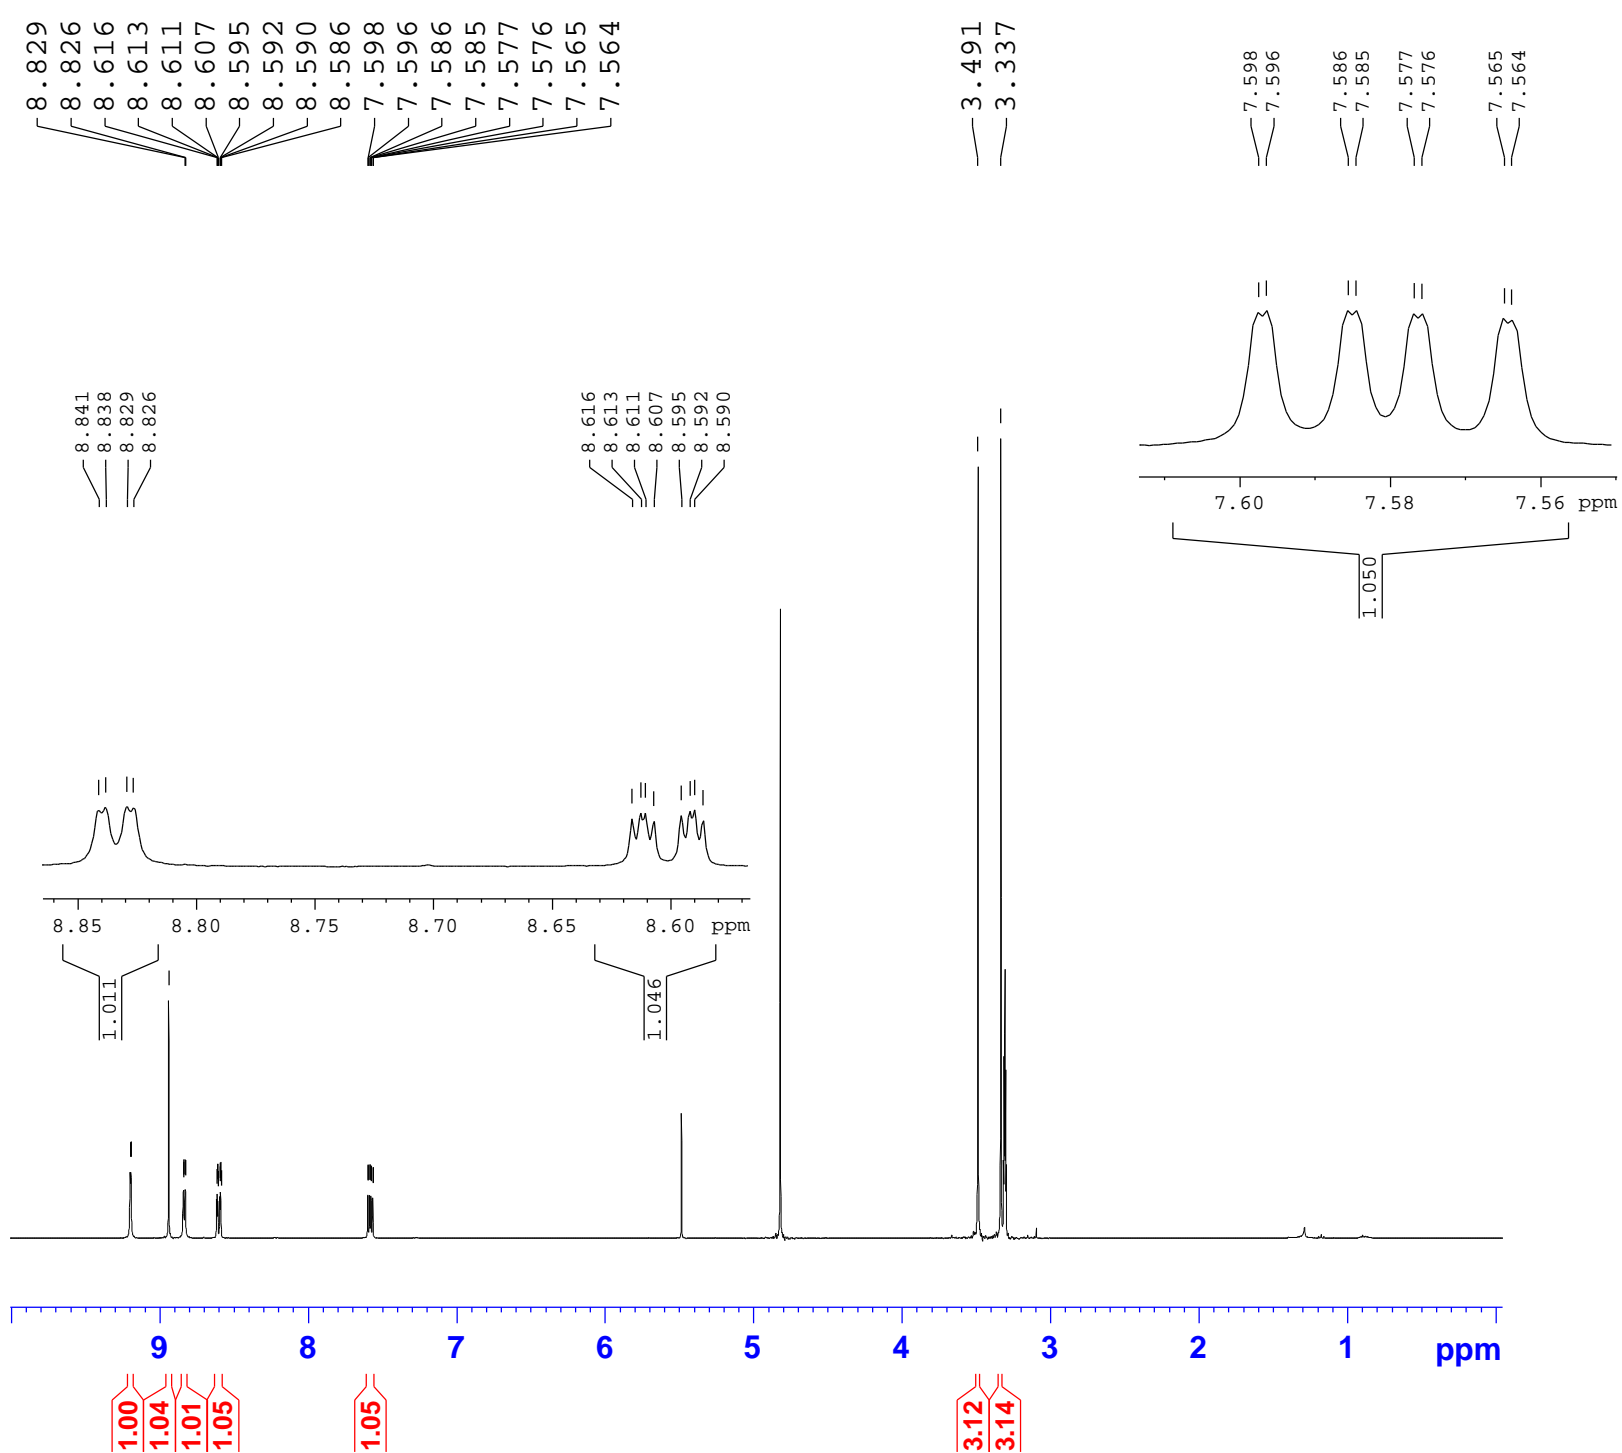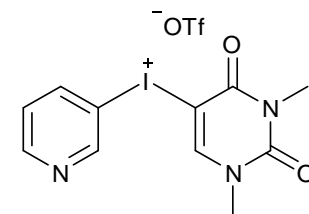

30

400 MHz  
MeOD



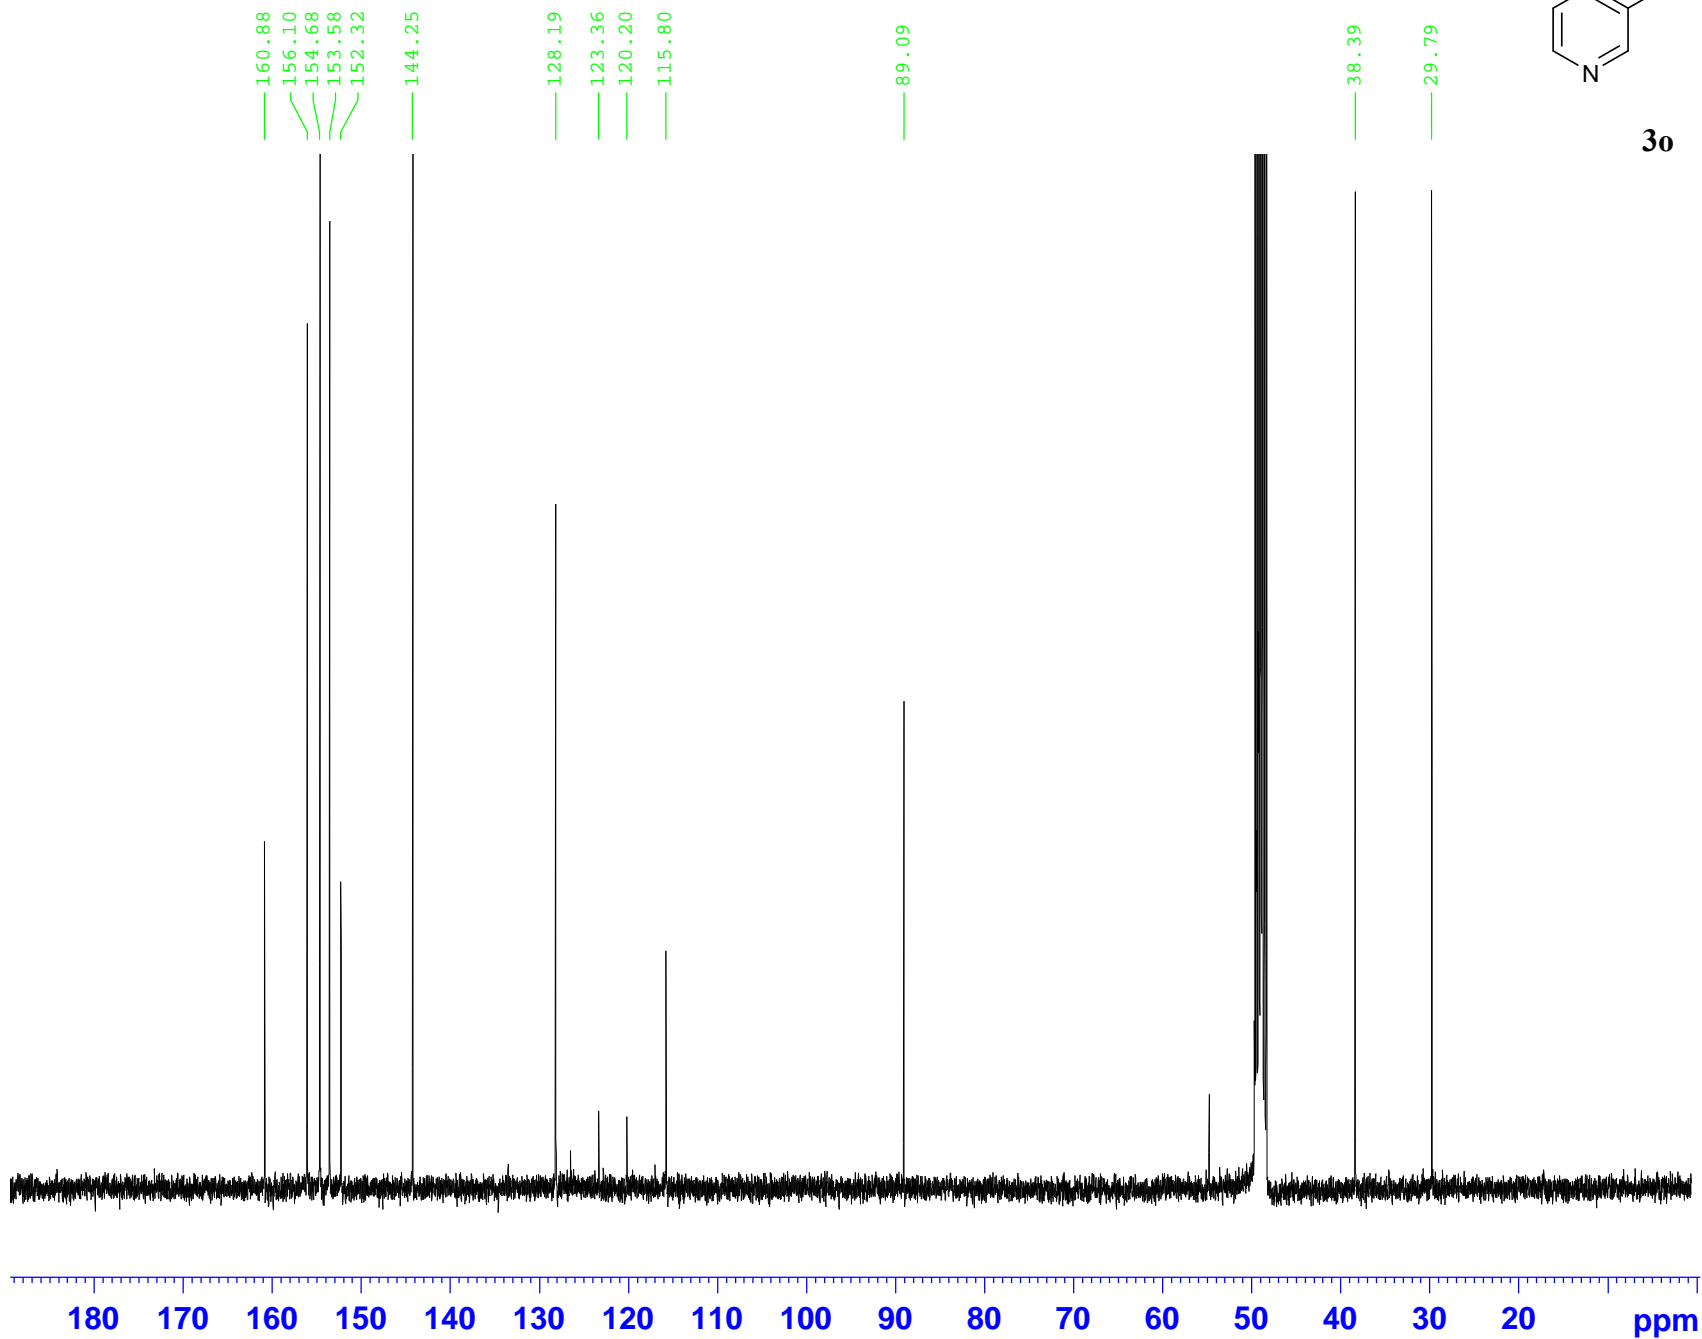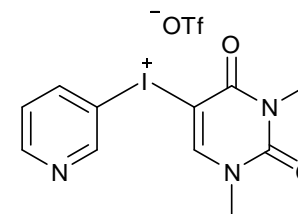

30

100 MHz  
MeOD

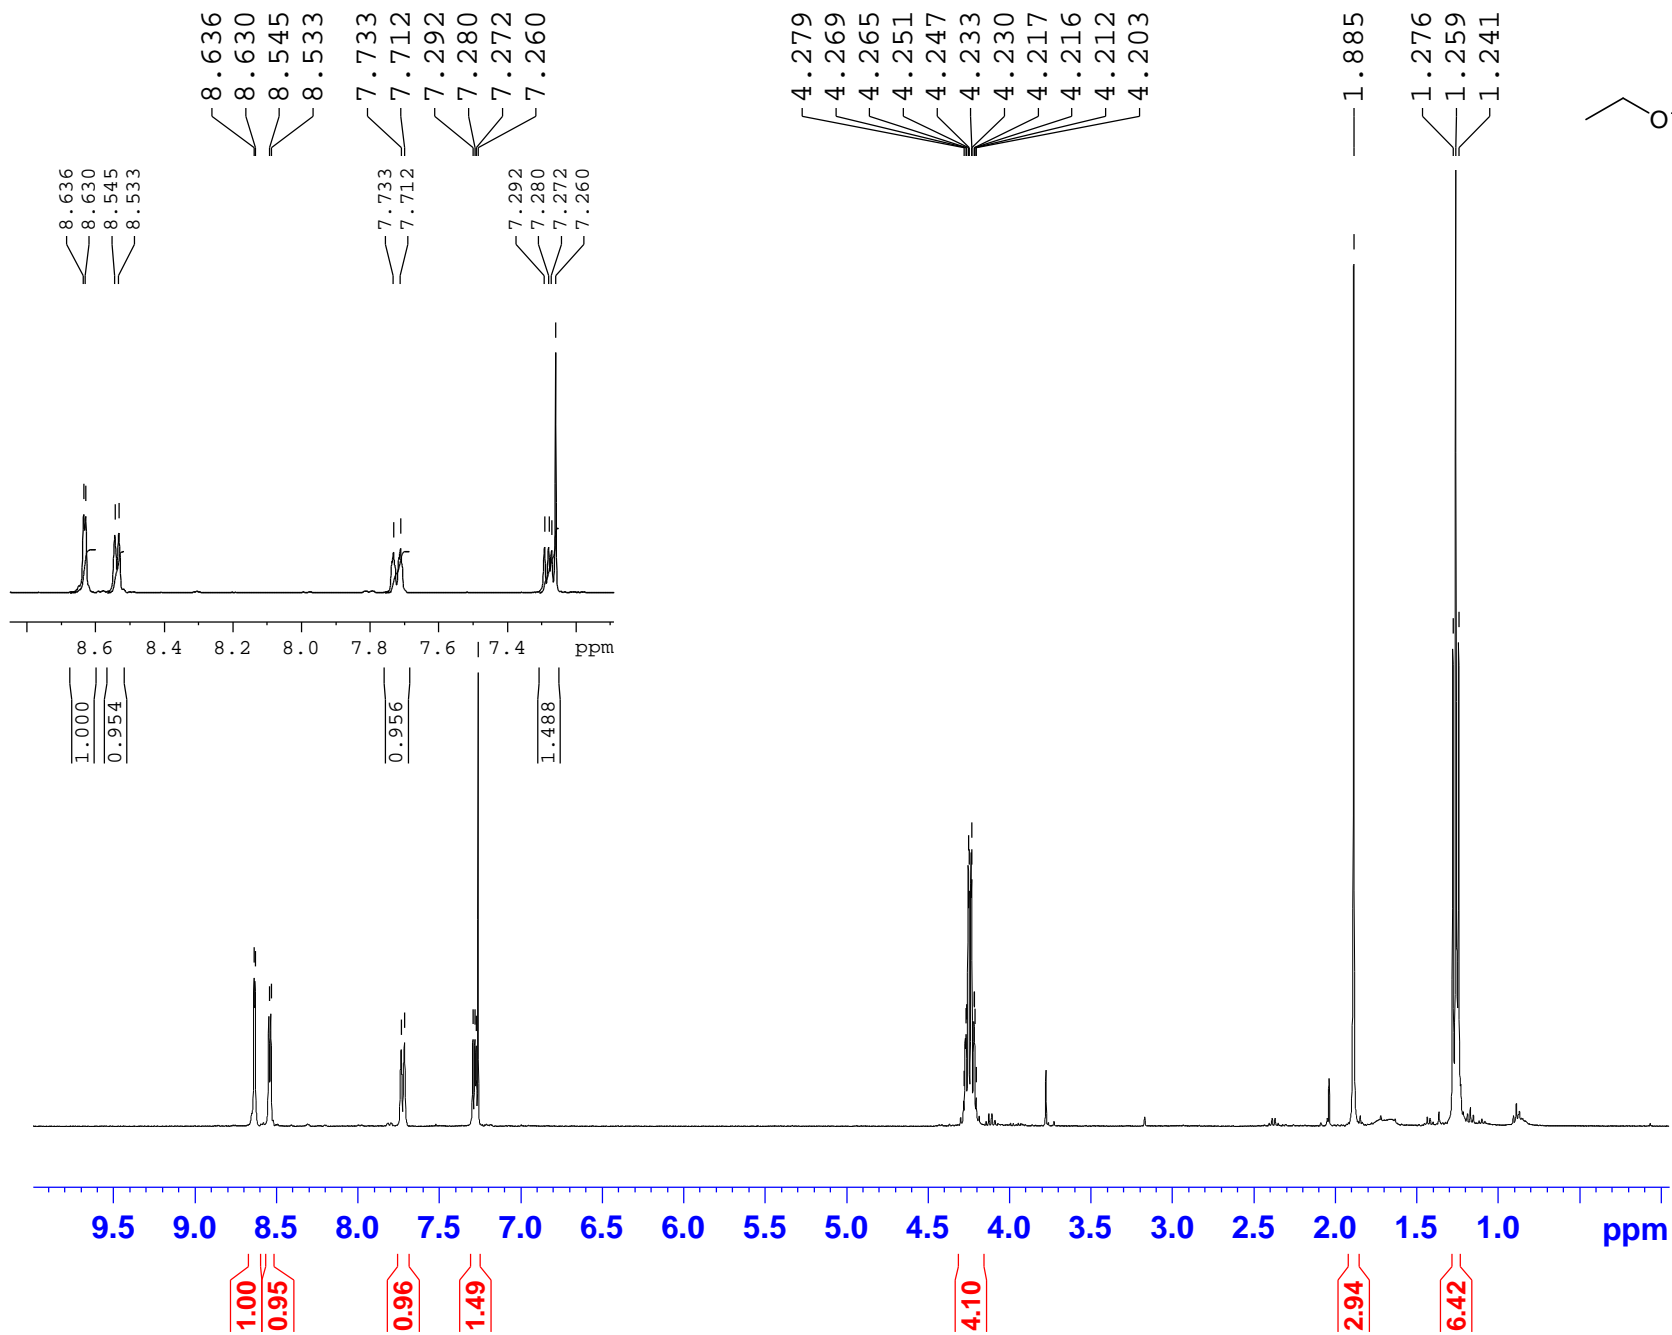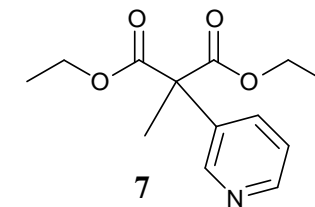

400 MHz  
MeOD

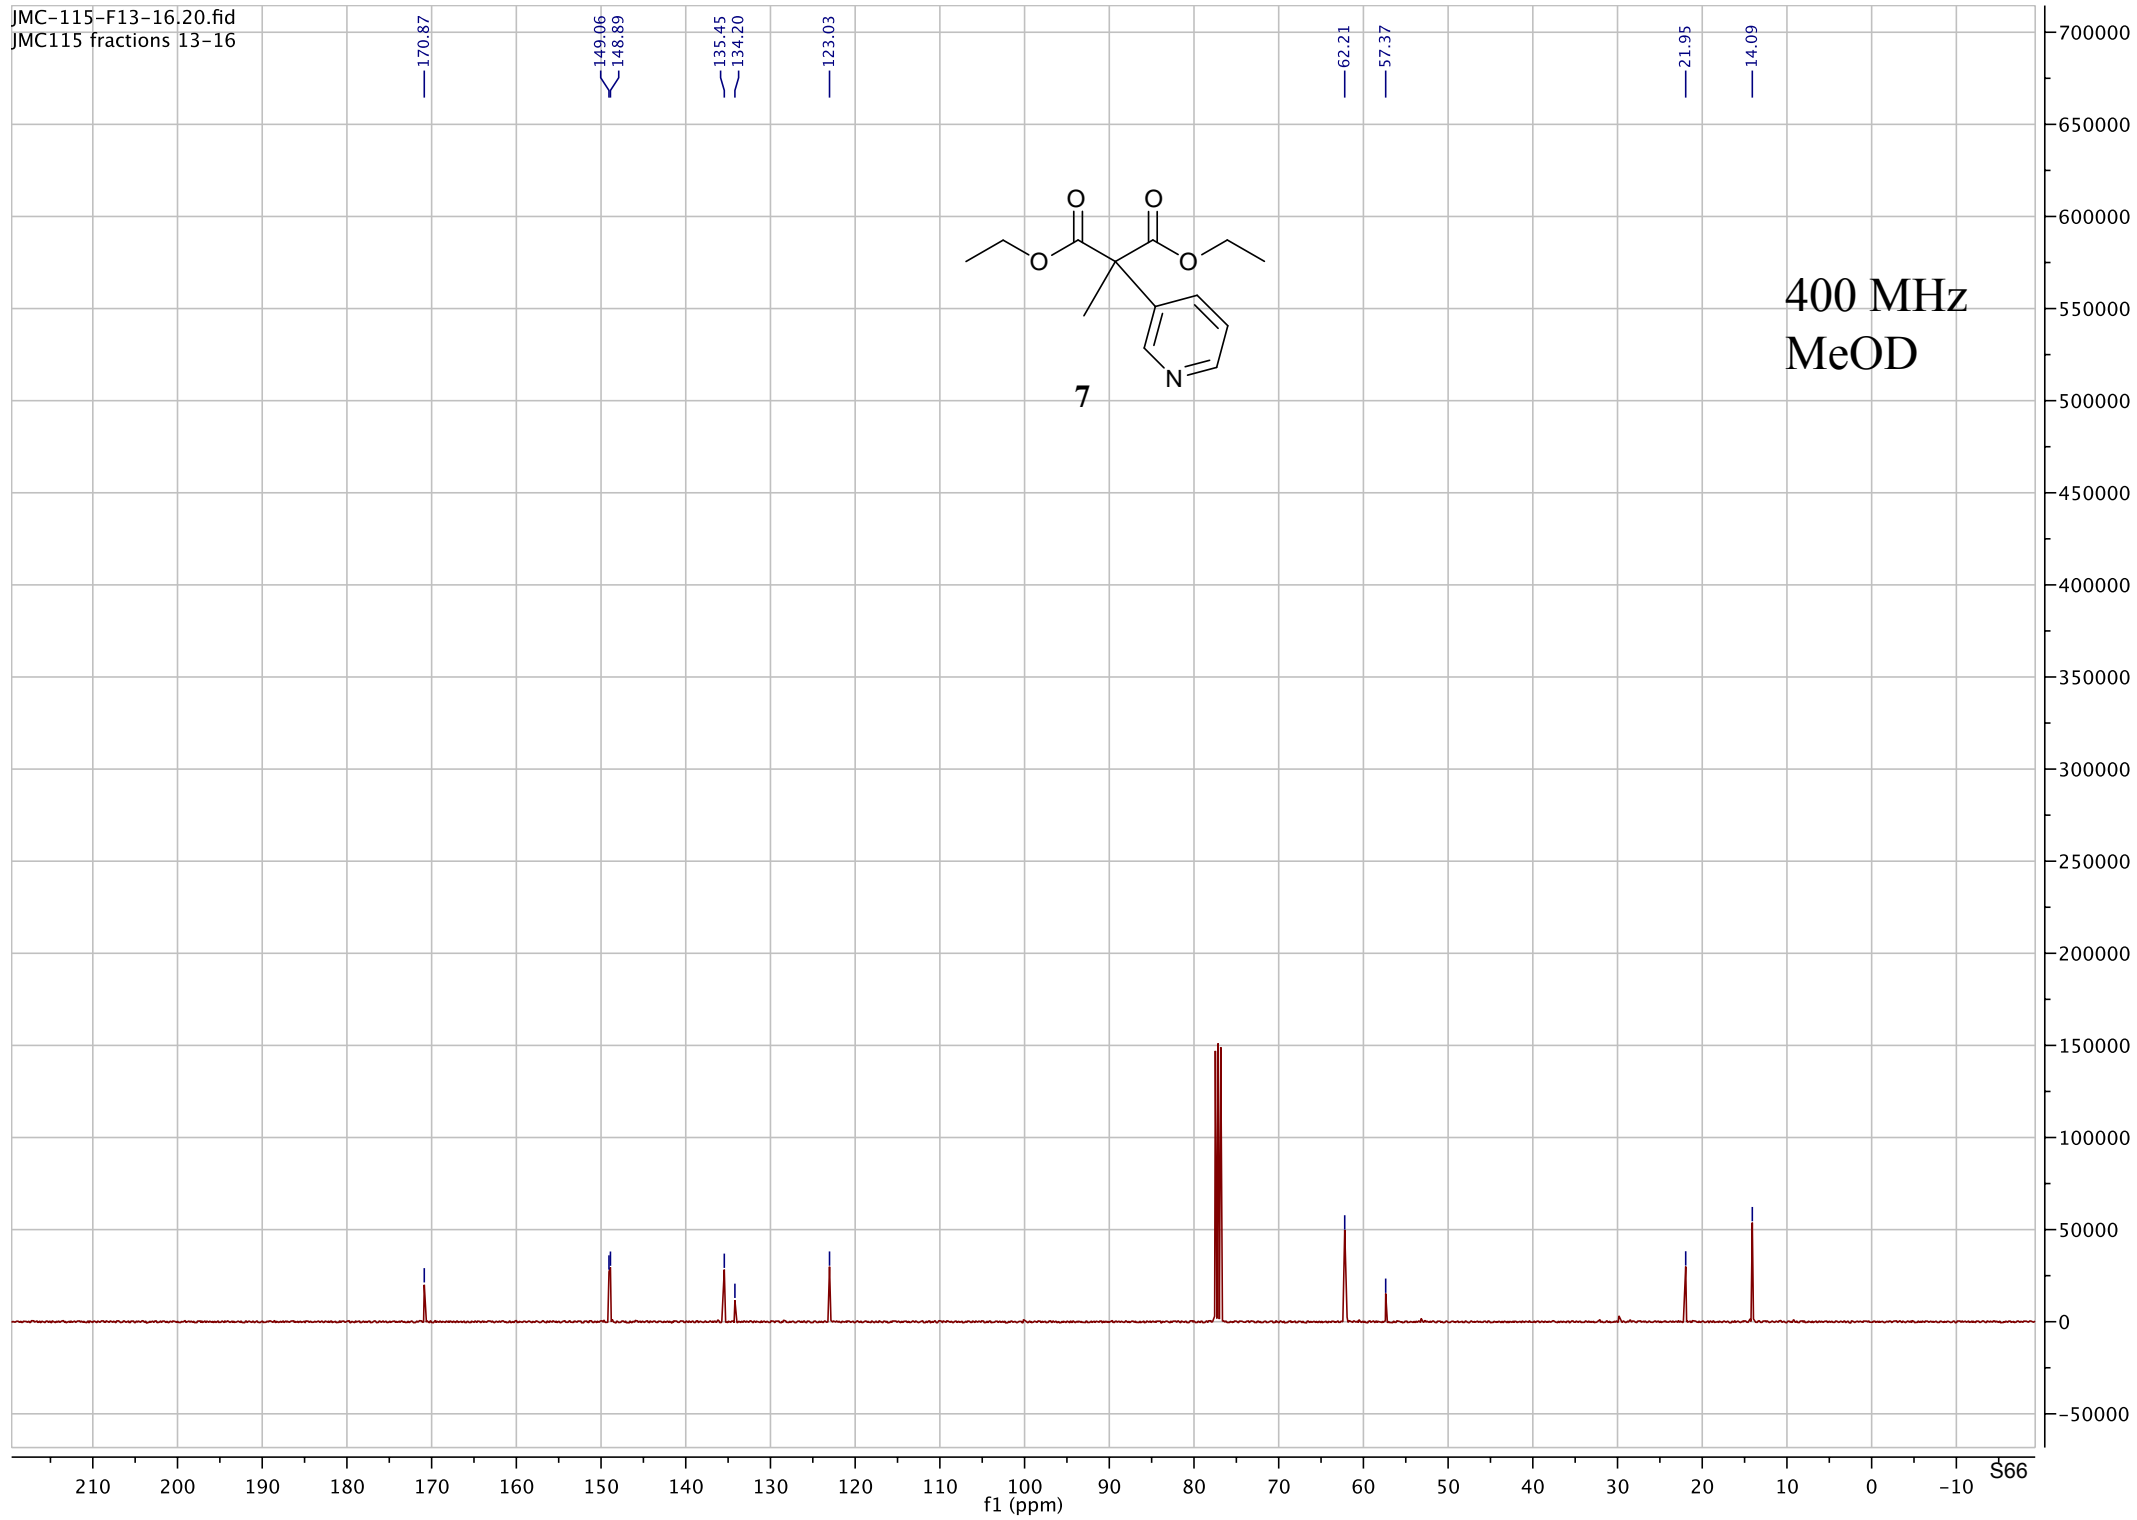

Supplement: open0003-0019-sd1.pdf [file open0003-0019-sd1.pdf]
